An equity-focused comparison of the COVID-19 vaccine rollout plans across six Canadian provinces

### Investigators:

\*Mercedes Sobers<sup>1,2</sup>, \*Vajini Atukorale<sup>1</sup>, Dane Mauer-Vakil<sup>3,4</sup>, Kainat Bashir<sup>3</sup>, Mariame Ouedraogo<sup>1</sup>, Christoffer Dharma<sup>1</sup>, +Anushka Ataullahjan<sup>1,5</sup>, +Shaza A. Fadel<sup>1</sup>, +Sara Allin<sup>1,3</sup>

### Affiliations:

1. Dalla Lana School of Public Health, University of Toronto, Toronto, Ontario, Canada
2. Office of Health Equity, Centre for Addiction and Mental Health, Toronto, Ontario, Canada
3. Institute of Health Policy, Management & Evaluation, University of Toronto, Toronto, Ontario, Canada
4. School of Public Health Sciences, University of Waterloo, Waterloo, Ontario, Canada
5. School of Health Studies, Faculty of Health Sciences Western University, London, Canada

\*Co-first authorship. These authors contributed equally to this work.

+ These authors contributed equally as supervisors to the lead authors and as co-senior responsible authors.

**Corresponding author:** Mercedes Sobers, [mercedes.sobers@utoronto.ca](mailto:mercedes.sobers@utoronto.ca)

**Declarations:** We declare no conflict of interest.

22     **Funding statement:** This research was made possible through the financial support and  
23     mentorship provided by the DLSPH Implementation Science Trainee Cluster Program at the  
24     University of Toronto Dalla Lana School of Public Health.

## Abstract

**Objectives:** This study examined how six Canadian provinces (Alberta, British Columbia, Manitoba, Nova Scotia, Ontario, Quebec) adapted guidelines from the National Advisory Committee on Immunization to prioritize COVID-19 vaccines equitably for five key populations at high risk: Black communities; First Nations, Inuit, and Métis populations; non-medical essential workers; individuals experiencing homelessness; and individuals with disabilities. The objective was to compare timelines, justifications, and contextual factors that influenced provincial prioritization for early vaccine access.

**Methods:** A mixed-methods approach was used to investigate how provinces operationalized equity in their vaccine rollout plans. Environmental scans (December 2020 – May 2021) gathered data on prioritization and distribution from provincial reports and media articles. Key informant interviews (December 2021 – April 2022) with provincial experts provided context on decision-making and justifications for prioritizing key populations. Data analysis employed the “Reach” component of the RE-AIM framework, with qualitative analysis of interviews following an interpretive descriptive approach.

**Results:** Provinces used age-, risk-, and health status-based approaches to select priority populations. While all provinces consulted the National Advisory Committee on Immunization guidelines and various ethical frameworks to guide their decisions, deviations occurred due to local contexts. First Nations, Inuit, and Métis populations were prioritized earliest in all provinces, while Black communities received the least prioritization. Key subgroups, such as

48 urban First Nations, Inuit, and Métis, unsheltered homeless individuals, and homebound  
49 disabled persons, were often overlooked. Factors that emerged as key drivers of priority  
50 population selection were data availability, population size, and geography.

51  
52 **Conclusions:** This study fills gaps in the literature by highlighting key contextual factors unique  
53 to each province that drove provincial justifications for their prioritization decisions. We  
54 provide several examples of the importance of data availability and early community-led  
55 partnerships when designing a successful mass vaccination rollout.

## Introduction

The COVID-19 pandemic took a significant health and economic toll globally with its high infectivity and mutation rate. Its morbidity and mortality burdens were on a scale unobserved since the 1918 Spanish influenza<sup>1</sup>. Although regulators around the world authorised COVID-19 vaccines for emergency use in record time for their respective countries, nations still had to acquire sufficient vaccine doses and then plan how to efficiently and equitably distribute the vaccine to all communities in order of risk<sup>2</sup>. All countries, regardless of income status, were forced to grapple with the limitations of their existing public health infrastructure and the state of their partnerships with communities in need.

In Canada, the collective federal, provincial, and territorial pandemic response goal was to “minimize serious illness and overall deaths while minimizing societal disruption” caused by COVID-19<sup>3</sup>. Although Health Canada approved the first COVID-19 vaccines for emergency distribution in December 2020, there was a global shortage of vaccines early in the rollout<sup>4</sup>. By the end of January 2021, the Canadian government secured about 1 million vaccine doses for a population of about 38 million, with shortages persisting until early April 2021<sup>4–6</sup>. Furthermore, the first two approved mRNA-based vaccines, manufactured by Moderna and Pfizer-BioNTech, had stringent cold storage requirements of -20°C and -80°C, respectively<sup>7–9</sup>. Vaccine supply chains in Canada were not adequately prepared to transport these vaccines efficiently to remote areas where the need was often the most critical<sup>10–12</sup>. Moreover, most approved vaccines required a minimum of two doses to be considered protected, necessitating additional planning around when to prioritize populations for their primary dose series, and how to follow

up with transient populations to ensure full coverage<sup>2</sup>. Given these on-the-ground realities, Canadian jurisdictions had to make difficult decisions regarding which populations to prioritize for vaccine distribution until more doses could be acquired.

Amidst such a challenging scenario characterized by high demand and limited vaccine supply, concerns regarding the fair distribution of vaccines inevitably surfaced within Canada and worldwide<sup>13–16</sup>. Drawing from lessons learned from past pandemics such as H1N1<sup>17</sup> Canada recognized the need for early, equitable access to COVID-19 vaccines within its own borders<sup>18</sup>. This was further energized by a societal and global consensus, led by international technical advisory groups on immunization (e.g. the United Kingdom’s Joint Committee on Vaccination and Immunization and France’s Haute Autorité de Santé), that equitable distribution was not only ethically imperative but also pivotal for limiting the spread of the COVID-19 virus<sup>19,20</sup>.

Canada’s national immunization technical advisory group, the National Advisory Committee on Immunization (NACI), was tasked with developing federal guidelines to ensure equitable COVID-19 vaccine distribution<sup>21</sup>. Provinces and territories were then responsible for implementing and adapting these recommendations to their local contexts<sup>22</sup>. Using the Ethics, Equity, Feasibility, and Acceptability (EEFA) framework, NACI defined equity as the “absence of avoidable, unfair, or remediable differences among groups, whether those groups are defined socially, economically, demographically, or geographically or by other means of stratification”<sup>21</sup>. These guidelines suggest that equity considerations, in addition to the standard age-based rollout, were essential to mitigating the negative impacts of the pandemic. Therefore, NACI

recommended phased prioritization of key populations who were grouped into four major categories: (1) those at high risk of severe illness and death from COVID-19 due to poorer health; (2) those at high risk of exposure and transmission due to the nature of their occupation or workplace; (3) those who maintain essential services; and (4) those who work or live in conditions that put them at high risk of infection with disproportionate consequences<sup>21,23</sup>. NACI recommended priority populations and dosing intervals by summarizing the best available evidence of existing risk data at the time, updating its guidelines throughout the vaccine rollout as more evidence became available<sup>24,25</sup>.

Our research group selected five key populations that were highlighted by NACI in the early stages of the rollout (late 2020 / early 2021) as experiencing a significantly higher risk of negative outcomes or barriers to vaccination than the general population<sup>25-27</sup>. These populations were Black communities; First Nations, Inuit, and Métis populations; non-medical essential workers; individuals experiencing homelessness; and individuals with disabilities<sup>25-27</sup>. We applied an equity lens to examine the variability in when and how Canadian jurisdictions chose to prioritize these populations across provinces. We also investigated how provinces considered contextual factors such as population size and distribution; current COVID-19 prevalence rates among specific populations<sup>28,29</sup>; and geographic and occupational risk exposures<sup>29</sup> that can significantly influence vaccine uptake.

This paper uses an implementation science approach to examine how six Canadian provinces considered and adapted NACI guidance regarding the equitable prioritization of COVID-19

vaccines for the above study populations during the primary dose series phase of the rollout (December 2021 to April 2022). Specifically, we:

1. Compared justification and timelines for prioritization used by the provinces for prioritization of the key populations.
2. Identified contextual factors that influenced how provinces selected priority populations for early COVID-19 vaccine access.

This paper is one of three publications conducted by our research team as part of a larger research project<sup>30,31</sup>.

## Materials and Methods

Comprehensive environmental scans and key informant interviews informed our understanding of each province's vaccine rollout plan, including any ethical frameworks used, the order of prioritization (timelines), and justifications provided for and the context around provincial decisions regarding prioritization of our five study populations. To ensure transparent and comprehensive reporting, we adhered to the COnsolidated criteria for REporting Qualitative research (COREQ) checklist, guiding the documentation of our study Methods and Results<sup>32</sup>. For a detailed reference, please consult S1 Appendix for the COREQ checklist. Approval for the research was obtained from the University of Toronto (UofT) ethics committee (REB protocol #28098).



## Researcher Characteristics

The research team, consisting of graduate students and research mentors from the UofT, was established through the Dalla Lana School of Public Health (DLSPH) Implementation Science Trainee Cluster Program at the UofT. The student researchers consisted of six doctoral students (four females: KB, MO, MS, VA; two males: CD, DMV) specializing in epidemiology, health services research, or public health sciences. They were guided by three female mentors (AA, SA, SF) with experience in implementation science, population health and immunity, health systems and policies, health system performance, and health equity. Representing diverse ethnicities and lived experiences, this multidisciplinary team brought a wealth of expertise to the study, including in implementation science, health equity research, infectious disease outbreak investigations, and vaccine science and policy. All team members had prior experience in qualitative research, including conducting structured or semi-structured interviews and interview-based questionnaires with various stakeholders such as key informants, community leaders/members, or patients. Additionally, several team members specialized in community-based, participatory action research, particularly among marginalized or vulnerable populations.

## Study Population and Context

We analysed prioritization plans for five key populations: Black communities, First Nations, Inuit, and Métis populations (FNIM), non-medical essential workers, individuals experiencing homelessness, and individuals with disabilities across six Canadian provinces (Alberta, British Columbia, Nova Scotia, Manitoba, Ontario, and Quebec). Our five population groups were selected because they were prioritized by NACI as being at substantial risk of transmission and

outbreaks, severe illness, and/or barriers to vaccine uptake<sup>21</sup>. We narrowed our study to the above six provinces after a preliminary environmental scan our team conducted of all Canadian jurisdictions. We concluded that these provinces had the most publicly available data on published prioritization plans and implementation timelines. Additionally, they provided a representative snapshot of the diversity of Canadian jurisdictions, in terms of population size and constitution, resources, and geography.

We also investigated how subgroups within our five populations of interest were prioritized, as our pilot scans indicated that there were differences in the extent to which these groups were prioritized across provinces. First, we defined Black communities as including people of African or Caribbean ancestry who live in Canada. Second, we examined prioritization for on- and off-reserve, urban, and remote FNIM populations. For essential workers, we narrowed our focus to only examining workers in non-healthcare settings because our preliminary scans indicated that essential workers in health-related settings (e.g. healthcare workers, staff in congregate settings, etc.) were prioritized first across all provinces. Additionally, we were interested in how provinces defined essential workers in their rollout plans as part of our analysis. This provided further context for how and why prioritization decisions were made for this diverse group. For individuals experiencing homelessness, we considered both those who lived in shelters (or individuals in second-stage housing) as well as those with precarious living conditions (e.g. not living in shelters, living on the streets, experiencing unstable housing, etc.). Finally, among individuals with disabilities, we focused on individuals facing significant barriers to vaccination due to either developmental (e.g., severe developmental delays, individuals in institutionalized

care) or physical challenges (e.g., homebound individuals). Overall, we wanted to keep in mind our key study objective of studying populations at high risk of negative outcomes and/or barriers to vaccine access.

## Data Collection

We used a two-step, mixed-methods approach to assess provincial efforts to reach priority populations. We first conducted environmental scans of the six provinces between December 1st, 2020, and May 31st, 2021, followed by key informant (KI) interviews between December 1st, 2021, and April 30th, 2022. The study period began when emergency vaccines were approved in Canada (Dec 2020) and ended just before all provinces reached their general population vaccination phase (around June 2021), as it was assumed that all high-risk populations requiring early prioritization would have been reached by that point. This period was selected to capture initial provincial decisions that were made about which populations to prioritize and strategies that were implemented for the primary dose series (first and second doses), in response to significant vaccine shortages and delays at the beginning of the rollout.

## Environmental Scans

For environmental scans, we reviewed provincial reports, statements, and scientific or media articles, released between December 2020 and May 2021, related to vaccine prioritization plans for our five key populations. We intentionally focused on provincial government-led efforts to reach priority populations, excluding community or grassroots initiatives that addressed gaps in provincial-led outreach, such as those facilitated by organizations like the Health Association of

African Canadians in Nova Scotia<sup>33,34</sup>, unless provinces intentionally collaborated with these community groups as part of their pre-determined strategy to prioritize and engage with communities (e.g. Black churches in Nova Scotia<sup>35</sup>). For the Environmental Scan Data Collection Tool used, please consult S2 Appendix.

The extracted data was used to generate a single summary for each province detailing their COVID-19 vaccine prioritization plans for our priority populations. For each key population, the summaries detailed the extent to which they were prioritized (if it all), along with the timeline and methodologies employed for vaccine implementation. Additionally, the summaries included justifications listed on provincial websites that would indicate how decision-makers rationalized their choices.

Environmental scans were conducted in two stages. Preliminary scans were conducted before KI interviews, and the initial findings were shared with KIs for validation, correction, and additional information. After incorporating feedback from the KIs (see below), a final environmental scan summary was compiled, incorporating any new data released since the initial scan and contextual information or corrections provided by KIs.

## Key Informant Interviews

To contextualize and validate our environmental scan findings, we conducted KI interviews with public health experts involved in the vaccine rollout across provinces between December 2021 and April 2022. The research team invited a total of 89 KIs from the six study provinces. KI

interviews were carried out until reaching saturation, comprising 31 interviews with 41 participants. Generally, interviews were conducted with individual KIs, unless they specifically requested a group interview. Of the 31 interviews conducted, 25 were individual sessions and six took place in groups of 2 to 4 individuals. To ensure comprehensive representation for each province, we conducted a minimum of 4 interviews per province. Two KIs later decided to withdraw their interviews from the study over concerns of being identified.

KIs chosen for our study held diverse roles in public health, including medical officers of health, vaccine task force leads, physicians, members of pandemic response teams, medical anthropologists, public health experts, and representatives from NACI. Of the 31 interviews, 27 (87%) represented academic, government, or research institutions, while 13% were affiliated with community organizations. Notably, approximately 90% of participants had prior experience with communicable disease control and vaccine delivery programs before the COVID-19 pandemic.

KIs were selected through a comprehensive review of publicly available information on key decision makers and stakeholders involved in COVID-19 vaccine rollout committees, working groups, advisory panels, task forces, as well as through the social networks of the team. Two members of the research team (MO and CD) sent invitation emails to selected individuals in stages, with up to two follow-up emails when necessary. A group of informants received the initial invitation; if there were no responses, additional potential informants from the respective province were contacted. Interested informants received an information sheet

detailing the study's objectives along with a consent form. Participation incentives were not provided. Those who accepted the invitation were scheduled for an online interview using Zoom.

Prior to the interviews, participants were asked to review our environmental scan summary of the COVID-19 vaccine rollout plan for their respective province. During the interview, KIs were asked to verify the accuracy of the findings from the environmental scan. They were also given the opportunity to offer any corrections or supplementary information during the interview or afterward via email. At the end of each interview, KIs were asked to recommend any potential informants that they believed could contribute to the issues discussed in the study. Those referred were then contacted by either the study team or directly by the referring KI, similar to a snowball sampling method of recruiting participants<sup>36</sup>.

Interviews were semi-structured, following an interview guide but allowing interviewers to ask probing questions for more information if needed (Refer to S3 Appendix for the Interview Guide). The interview guide was pilot tested by research team members. Interviews were scheduled for 1.5 hours each and generally took the full time. KI interviews were primarily conducted by two members of the research team (MS and VA) with support from two team members (KB and CD) on two separate occasions due to scheduling conflicts. Researchers conducted interviews from private rooms with KIs to ensure confidentiality. All interviews were conducted over Zoom and were audio recorded after expressly seeking participant consent. Preliminary transcription was completed by the Zoom platform. Transcripts were further

reviewed by all student research members. Within two weeks of each interview, KIs received the cleaned transcript for review and were given the opportunity to respond via email with any concerns they had regarding the accuracy of captured information.

## Data Analysis

Our analysis was guided by the “Reach” component of the RE-AIM implementation science framework<sup>37</sup>. Using this framework, we were able to implement a content analysis approach of extracting data on the prioritization of populations and the strategies employed to promote COVID-19 vaccine uptake. The “Reach” component of RE-AIM framework assesses the extent to which an intervention or program effectively reaches its intended target population and achieves broad reach among the individuals or groups it aims to impact<sup>38</sup>. Although the RE-AIM framework has four other components (effectiveness, adoption, implementation, and maintenance), we determined that “Reach” was the only component that would sufficiently address our project goals during our study time period, which was very early on in the rollout. We conceptualized our study around September 2020, prior to the first COVID-19 vaccines being licensed (December 2020). NACI guidelines on reaching priority populations and provincial vaccine rollout plans were just starting to get published. We concluded that it would be premature to utilize the full RE-AIM framework since it would likely take several months, if not a few years, to determine the effectiveness of these policy plans, how well they were adopted and implemented, and whether they were successful enough to incorporate into regular policy practices over time.

Guided by “Reach”, we focused on the first two of four indicator questions (Table 1) to determine the following for each province: (a) if and when each of the five key populations was prioritized and (b) how provinces justified their prioritization decisions to the general public. Obtaining answers to these study objectives drove how we structured our environmental scans as well as the themes analysed from the KI interviews.

**Table 1. Data analysis guiding questions.**

|   |                                                                                                                                                                                               |
|---|-----------------------------------------------------------------------------------------------------------------------------------------------------------------------------------------------|
| 1 | Was this population prioritized? If so, when?                                                                                                                                                 |
| 2 | Were there clear communication and justification for the choice of this population?                                                                                                           |
| 3 | What strategies or interventions, if any, were used to reach or engage with the prioritized population?                                                                                       |
| 4 | What strategies or interventions, if any, were used to overcome potential challenges to access the vaccine for those populations, including strategies to improve trust and reduce hesitancy? |

To analyse KI interview data, we first employed an interpretive descriptive qualitative approach<sup>39</sup>. Transcripts were managed using NVivo 12 software and independently analysed by members of the research team (KB, MO, CD and DMV) through inductive thematic analysis. This inductive approach allowed for a deep exploration of the context surrounding vaccination strategies and implementation, facilitating the identification of patterns, categories, or themes not previously considered<sup>39,40</sup>, thereby enhancing the study's rigor by ensuring the findings were grounded in the data<sup>39</sup>.



Coding followed Creswell's approach<sup>41,42</sup>, wherein each transcript was initially read, and key ideas or responses relevant to the study objectives were independently highlighted by two team members. These ideas were then assigned a "code," with operational definitions ensuring consistent application across the data. Similar codes were grouped to form broader themes, serving as the main units of analysis<sup>41</sup>. Summaries were then developed for each theme by reviewing all coded data, a process completed by two team members (KB and MO), with revisions and consensus on themes achieved through regular meetings and discussions among team members. Any discrepancies in coding, categorization, or definitions were discussed, with consensus sought throughout the analysis process.

## Results

Objective 1: Compare justification and timelines used by the provinces for prioritization of key populations

Overall provincial approaches to population prioritization and ethical frameworks used in designing vaccine rollout plans

Table 2 summarizes each province's overall public health approach in determining priority populations and any ethical frameworks identified. KIs confirmed that all provinces consulted NACI guidelines, including NACI's EEFA framework, to guide their decisions regarding priority populations, vaccine delivery, and storage. According to our environmental scans and KI interviews, provinces utilised a combination of age-, risk-, and health status-based approaches to select priority populations, in accordance with NACI guidelines. How provinces defined risk varied depending on their local contexts, ranging from protecting those at risk of developing

severe illness, minimizing transmission in workplaces or in remote regions, or maintaining the function of critical provincial services.

**Table 2. Overall public health approach to population prioritization, frameworks used to guide decisions, and level of adherence to NACI recommendations.**

| Province:               | Selection of priority populations based on:                                                                                                                                                                                                                          | Main frameworks, including any ethical frameworks, identified:                                                                                                                                                                    | Deviations from NACI:                                                                                                                                                                                                                                                                  |
|-------------------------|----------------------------------------------------------------------------------------------------------------------------------------------------------------------------------------------------------------------------------------------------------------------|-----------------------------------------------------------------------------------------------------------------------------------------------------------------------------------------------------------------------------------|----------------------------------------------------------------------------------------------------------------------------------------------------------------------------------------------------------------------------------------------------------------------------------------|
| <b>Alberta</b>          | Risk- then age-based prioritization<br><br><b>AIM:</b> protect those at highest risk of poor outcomes; prevent transmission, particularly in remote regions                                                                                                          | NACI's EEFA framework*, with province-specific modifications.<br><br>Policy document titled <i>Appropriate Prioritization of Access to Health Services</i> (developed in Dec 2015) used as formal ethical framework <sup>43</sup> | Did not prioritize Black communities directly in policy rollout plan<br><br><b>"Hot spot" strategy</b> employed for regional prioritization                                                                                                                                            |
| <b>British Columbia</b> | Age- and health status-based approach<br><br><b>AIM:</b> protect those at risk of developing severe illness; maintain the workforce for critical services                                                                                                            | NACI's EEFA framework, with province-specific modifications<br><br>British Columbia Centre for Disease Control's (BCCDC) COVID-19 Ethical Decision-Making Framework <sup>44</sup>                                                 | Did not prioritize Black communities directly in policy rollout plan<br><br><b>"Hot spot" strategy</b> employed for regional prioritization                                                                                                                                            |
| <b>Manitoba</b>         | Risk-based (workplace exposures, living arrangement) followed by age-based prioritization and sustaining healthcare services<br><br><b>AIM:</b> prevent workplace exposures and sustain healthcare services, then protect those at risk of developing severe illness | NACI's EEFA framework, with province-specific modifications<br><br>Manitoba's Vaccine Immunization Task Force's 'full immunization fast' policy <sup>45</sup>                                                                     | Did not employ a phased approach to the vaccine rollout<br><br>Did not prioritize Black communities directly in policy rollout plan<br><br>MFNPRCT* recommended First Nations children (5-11 yrs) to receive second dose within 21 days of first dose (NACI recommended 8-wk interval) |

|                    |                                                                                                                                                                                                                 |                                                                                                                                                                                                                                                                                                    | <b>“Hot spot” strategy</b> employed for regional prioritization                                                                                                                                                                                                                                                                                                                                                                                                                                                                                |
|--------------------|-----------------------------------------------------------------------------------------------------------------------------------------------------------------------------------------------------------------|----------------------------------------------------------------------------------------------------------------------------------------------------------------------------------------------------------------------------------------------------------------------------------------------------|------------------------------------------------------------------------------------------------------------------------------------------------------------------------------------------------------------------------------------------------------------------------------------------------------------------------------------------------------------------------------------------------------------------------------------------------------------------------------------------------------------------------------------------------|
| <b>Nova Scotia</b> | <p>Primarily age-based prioritization followed by risk of exposure due to difficulties adhering to public health protocols</p> <p><b>AIM:</b> prevent morbidity and mortality; sustain healthcare services.</p> | NACI’s EEFA framework, with province-specific modifications.                                                                                                                                                                                                                                       | <p>Did not prioritize certain NACI-recommended priority groups because of strict adherence to age-based rollout policy:</p> <ul style="list-style-type: none"> <li>• Individuals at risk of severe illness due to medical factors (e.g. pregnancy, disabilities, and other underlying medical health conditions)</li> <li>• Certain NACI-recommended essential workers (e.g. teachers, grocery store employees)</li> <li>• Prioritized single-dose vaccines (e.g. Janssen) for populations predicted to be challenging to follow up</li> </ul> |
| <b>Ontario</b>     | <p>Risk- and age-based prioritization</p> <p><b>AIM:</b> protect those at risk of developing severe illness</p>                                                                                                 | <p>NACI’s EEFA framework, with province-specific modifications</p> <p>Ontario COVID-19 Vaccine Distribution Task Force’s Ethical Framework<sup>49</sup> (published in Dec 2020), which was adapted from NACI’s EEFA framework</p>                                                                  | <b>“Hot spot” strategy</b> employed for regional prioritization                                                                                                                                                                                                                                                                                                                                                                                                                                                                                |
| <b>Quebec</b>      | <p>Age- then risk-based prioritization</p> <p><b>AIM:</b> protect those at risk of developing severe illness</p>                                                                                                | <p>Provincial rollout plan was primarily informed by the <a href="#">Erickson and De Wals</a> framework<sup>47</sup> (developed in 2005), which was used to guide NACI’s EEFA framework</p> <p>Quebec’s Immunization Committee (Comité sur l’Immunisation du Québec, CIQ) also consulted other</p> | <p>Did not prioritize Black communities directly in policy rollout plan</p> <p>Delayed delivery of second dose for 16 weeks (NACI recommended 21-and 28-day intervals for Pfizer and Moderna, respectively) to maximize first-dose delivery to priority groups 1-6<sup>48</sup>. Based</p>                                                                                                                                                                                                                                                     |

|  |  |                                                                                                                     |                                                                        |
|--|--|---------------------------------------------------------------------------------------------------------------------|------------------------------------------------------------------------|
|  |  | expert groups, including Canada's NACI guidelines (EEFA framework), WHO, CDC (U.S.), JCVI (U.K.), and HAS (France)* | on success, this strategy was later adopted by NACI <sup>49,50</sup> . |
|--|--|---------------------------------------------------------------------------------------------------------------------|------------------------------------------------------------------------|

\* EEFA = Ethics, Equity, Feasibility, and Accessibility Framework; NACI = National Advisory Committee on Immunization; ON-MOH = Ontario Ministry of Health; MFNPRCT = Manitoba First Nations Pandemic Response Coordination Team; WHO = World Health Organization; CDC = Centers for Disease Control and Prevention; JCVI = Joint Committee on Vaccination and Immunization; HAS = Haute Autorité de santé

Table 2 also summarizes notable ways in which provinces deviated from NACI guidelines based on their local contexts. First, four provinces (Alberta, British Columbia, Manitoba, and Quebec) did not directly prioritize Black communities in their vaccine rollout policies, despite being specifically mentioned by NACI as a racialized group at higher risk of developing severe outcomes due to systemic barriers to accessing healthcare<sup>27</sup>. Justifications provided by provinces for this choice are discussed in the next section. Second, multiple provinces (Alberta, British Columbia, Manitoba, and Ontario) employed a “hot spot” strategy for regional prioritization to reach key demographics that could not be easily captured through other strategies, a method that was not mentioned by NACI. Third, Quebec and Manitoba deviated from NACI-recommended dosing intervals due to provincial considerations regarding how to balance prioritizing those most at risk with reaching the most people amidst early vaccine shortages<sup>48</sup>. Quebec’s strategy was later adopted by NACI in March 2021 because of increasing scientific evidence of the usefulness of this strategy, particularly during the early vaccine shortages from January to March 2021<sup>49,50</sup>. Fourth, Nova Scotia made an early decision to strictly adhere to a primarily age-based rollout<sup>51–53</sup>, with very few notable exceptions that will

be discussed later. While age-based prioritization was consistent with NACI recommendations, Nova Scotia deviated from NACI by intentionally not prioritizing certain populations recommended in NACI's equity matrix<sup>21</sup>. This included individuals with underlying medical conditions, individuals with disabilities, as well as certain groups of essential workers<sup>25,27,52,54</sup>. Provincial justifications for this decision will be discussed later. Finally, many provinces employed a phased vaccine rollout strategy, as was consistent with NACI guidelines<sup>27</sup>, while Quebec used a similar rank-based system of prioritization (Fig 1). However, Manitoba used what it referred to as a "full immunization fast" policy rather than a phased approach<sup>45</sup>, where eligibility was based on vaccine availability. Eligibility was communicated to the public through regular COVID-19 Vaccine Bulletins and news releases.

# **Fig 1. Timeline of prioritization of five key populations across six provinces.**

\*, \*\*, \*\*\*: Detailed list of essential worker categories is listed in Table 4.

Abbreviations: FN = First Nations; FNIM = First Nations, Inuit, and Métis; intellect. = intellectual; dev. = developmental; CLdS = Community Living disABILITY Services

Justifications and timelines provided by the provinces for prioritization of key populations: According to our environmental scans and KIs, prioritization of our study populations varied between provinces. For this section, Fig 1 provides detailed timelines for prioritization by province and study population. Table 3 provides a summary of justifications provided by provinces for their prioritization choices.

380 **Table 3. Justification provided by provinces for their choice of prioritization of key populations.**

| <b>Justification provided</b>                                                              | <b>Black communities</b> | <b>FNIM populations</b>                                                                                                      | <b>Non-medical essential workers</b>              | <b>Individuals experiencing homelessness</b>                                                                       | <b>Individuals with disabilities</b> |
|--------------------------------------------------------------------------------------------|--------------------------|------------------------------------------------------------------------------------------------------------------------------|---------------------------------------------------|--------------------------------------------------------------------------------------------------------------------|--------------------------------------|
| High risk of transmission or severe illness due to social, economic, or structural factors | NS, ON                   | AB, MB, NS, ON, QC                                                                                                           | AB, BC, QC                                        | AB, BC, ON, QC                                                                                                     |                                      |
| High risk of severe illness due to underlying medical conditions                           |                          | MB, QC                                                                                                                       |                                                   | QC                                                                                                                 | AB, BC, MB, ON, QC                   |
| Hard to reach / remote or isolated communities                                             |                          | AB, BC, MB, ON, QC                                                                                                           |                                                   | AB, BC                                                                                                             | ON                                   |
| High risk of outbreaks due to living in congregate settings                                |                          |                                                                                                                              | BC, MB, NS                                        | AB, BC, MB, NS, ON, QC                                                                                             | BC                                   |
| Historical evidence of inequities or injustices that impact vaccine confidence/uptake      | NS, ON                   | AB, MB, ON, QC                                                                                                               |                                                   |                                                                                                                    |                                      |
| Work in critical non-medical essential services <u>and</u> unable to work from home        |                          |                                                                                                                              | BC, NS, ON, QC                                    |                                                                                                                    |                                      |
| “Hot spot” community (N/A for NS and QC)                                                   | ON                       |                                                                                                                              | BC, MB, ON                                        |                                                                                                                    |                                      |
| Real-time risk data                                                                        | ON                       | AB, MB                                                                                                                       |                                                   |                                                                                                                    | AB                                   |
| Other justification(s)                                                                     |                          | Instill community trust in provincial vaccination plan (MB)<br><br>Difficulty applying isolation measures; reduced access to | Consistently travel into and out of province (NS) | Cannot maintain public health safety protocols (QC)<br><br>Difficulty following up with transient populations (AB) |                                      |

381

|                 |                |                                         |  |  |    |
|-----------------|----------------|-----------------------------------------|--|--|----|
|                 |                | specialized healthcare<br>services (QC) |  |  |    |
| Not prioritized | AB, BC, MB, QC |                                         |  |  | NS |

382

AB = Alberta; BC = British Columbia; MB = Manitoba; NS = Nova Scotia; ON = Ontario; QC = Quebec

### *Black communities:*

Black communities were the least prioritized of our five study populations, despite real-time news reports from multiple provinces showing that these communities had been disproportionately impacted by COVID-19<sup>55–58</sup>. A common justification provided by KIs for these provinces was that race-based data was not widely collected in Canada<sup>59</sup>, which limited crucial real-time evidence gathering on high-risk communities and regions.

Of the six provinces, only Nova Scotia and Ontario clearly prioritized Black communities in published policy plans. They were one of very few exceptions to Nova Scotia’s strict age-based prioritization strategy. Both the scans and our KIs stated that the provincial government’s generations-long partnership building with African Nova Scotian communities was critical to successful outreach<sup>60</sup>. Early discussions with African Nova Scotian community leaders highlighted the need for immediate and extensive prioritization of Black communities due to a history of racism and the resulting lack of community trust in healthcare systems<sup>35,61</sup>.

Although race-based data was not routinely collected in Ontario during the study period, the province prioritized Black populations living in “hot spot” communities (determined by postal code) for vaccination. Black scientists and medical experts working directly with the provincial government and the City of Toronto strongly supported this decision by sharing real-time data indicating that these “hot spot” communities were experiencing the highest rates transmission, hospitalization, and death due to COVID-19<sup>58,62,63</sup>. They further stated that vaccine hesitancy was highest among Black people of African and Caribbean origins, data consistent with NACI



findings<sup>27,58</sup>. However, KIs for Ontario were unclear whether Black populations living in non-“hot spot” regions were prioritized for vaccination, highlighting this as a potential gap in prioritization. One KI noted the following:

*“It is not just Black people in low socio-economic circumstances or hotspot communities who are at risk. Black people in middle income suburbs are also at risk because of the systemic racism that weathers the black body and creates patterns of chronic conditions amongst Black people across Canada.”*

*- Key Informant from Ontario (ID 827)*

While the scans did not reveal justifications through published policy documents, KIs for the other four study provinces provided insights into why Black communities were not listed in their rollout plans. KIs for Alberta stated that race-based data was not available to justify a clear need for prioritization. KIs from British Columbia stated that the province’s Black populations comprised only approximately 1% of the overall population<sup>64</sup>. KIs for Quebec asserted that not all Black communities required early prioritization and considered them to be too heterogeneous in terms of risk to capture by race alone.

According to KIs, these provinces used an intersectional approach to attempt to reach Black communities. Alberta prioritized groups that had higher risks of severe outcomes due to age or underlying medical conditions, as well those experiencing a higher risk of transmission exposure (e.g. essential workers). Quebec targeted refugees, immigrants, and essential workers for vaccination because these groups demonstrated high rates of hospitalizations and deaths.

British Colombia prioritized geographic areas with higher percentages of immigrants and refugees. Finally, KIs for Manitoba did not provide a rationale for why they did not prioritize their Black populations, but they stressed that the provincial focused on racialized communities more generally as an attempt to reach their Black communities.

#### *First Nations, Inuit, and Métis (FNIM) populations:*

Environmental scans and KI interviews showed that, of our study populations, the FNIM were prioritized earliest in all provinces, which was consistent with NACI guidelines<sup>25-27</sup> (Fig 1). The most common justifications provided for prioritizing FNIM populations are listed in Table 3.

Provinces employed some interesting prioritization strategies to accelerate vaccination of FNIM populations, given their respective local contexts. A few provinces (British Columbia, Manitoba, Ontario) prioritized FNIM age groups that were 15-20 years lower, on average, than that of the general population at any given point in time. KIs cited published data showing that the life expectancy for FNIM was significantly lower (e.g. up to a 17-year difference in some studies) than that of the non-Indigenous population<sup>65,66</sup>. KIs for Manitoba shared that the province did not directly prioritize remote and isolated communities in their rollout policy, which deviated from NACI guidelines<sup>26</sup>, but instead attempted to capture them indirectly through community-based “hot spot” eligibility. In Nova Scotia, the government prioritized the Mi’kmaq First Nation people first in another exception to their age-based prioritization rule. KIs explained that the Mi’kmaq were the predominant Indigenous population in Nova Scotia. By targeting vaccination efforts towards this population, they hoped to reach both remote and urban communities early

in the rollout. They also confirmed that any individual who identified as FNIM but who was not Mi'kmaw would have to follow the standard age-based eligibility criteria implemented for the rest of the province.

### *Gaps in prioritization*

KIs for Alberta and Manitoba shared that excellent real-time scientific evidence existed for First Nations communities (and for the Métis peoples, in the case of Alberta), clearly demonstrating that that these communities experienced significant harms related to COVID-19. This data served as critical justification for prioritizing these populations. However, similar data-sharing agreements were not in place for the Inuit in Alberta, and for both the Métis and Inuit in Manitoba. KIs stated that, unfortunately, there was insufficient risk data regarding these populations for decisionmakers to justify early prioritization without it appearing as preferential treatment. As a result, these communities were not prioritized until several months into the rollout, after reviewing real-time data from other provinces, which impeded vaccination progress at a critical stage of the rollout (see “Limitations of Data Availability” section below).

NACI guidelines recommended prioritizing urban FNIM for vaccination, as “systemic barriers to accessing necessary supportive care for COVID-19 also exist in urban settings related to factors such as poverty, systemic racism, and homelessness”<sup>26</sup>. Yet, many provinces appeared to rely mainly on age-based prioritization of all FNIM adults to capture this community, rather than on directly prioritizing this important subgroup. KIs for these provinces justified their choice by stating that they deemed risk to be higher in more remote territories than in intermediate or

urban communities. Other reasons given for prioritizing remote over urban settings were: (1) the higher likelihood of severe health outcomes because of underlying medical conditions and poor housing conditions in remote settings; (2) a stronger risk of uncontrolled transmission or outbreaks because of challenges in enforcing isolation measures; and (3) reduced access to specialized healthcare services if infected. Urban FNIM in Ontario were later added to the rollout plan after strong advocacy from local FNIM community leaders<sup>67,68</sup> (see “Limitations of Data Availability” section).

#### *Essential workers in non-healthcare settings:*

All provinces prioritized essential workers in non-health related occupations in the second phase of the vaccine rollout (around April 2021) after healthcare workers, which was consistent with NACI guidelines<sup>26</sup> (Fig 1). KIs for the provinces frequently stated that this timeline was also necessary because of the severe, country-wide vaccine shortages between January and March 2021. The scarcity and delivery delays constrained provinces to prioritize vaccinating only their highest risk groups during those months<sup>69</sup>.

Essential workers, whether referred to as “critical workers” (Manitoba) or “priority front-line workers” (British Columbia), referred to a similar category of workers whose services could not be completed from home. Provinces adapted essential worker categories suggested by NACI to more accurately reflect critical services provided in their local contexts (Table 4). Provinces generally agreed with the NACI assertion that essential workers, who often worked in crowded conditions where public health safety protocols could not be maintained, had an increased risk

of COVID-19 exposure, and therefore should be prioritized<sup>27,70</sup>. Further justifications for prioritization are summarized in Table 3.

**Table 4. Provincial definitions of essential workers in non-health related occupations.**

| Province         | Type of non-medical essential worker:                                                                                                                                                                                                                                                                                                                                                                                                                                                                                                              |
|------------------|----------------------------------------------------------------------------------------------------------------------------------------------------------------------------------------------------------------------------------------------------------------------------------------------------------------------------------------------------------------------------------------------------------------------------------------------------------------------------------------------------------------------------------------------------|
| Alberta          | <b>Phase 2C (Apr 12, 2021):</b> healthcare professionals, educators and support staff, childcare and support personnel, staff working in congregate settings, shelter and correctional facility staff, meatpacking plant employees, caregivers of high-risk individuals, designated family/support persons of individuals in long-term care, and law enforcement officers (e.g. front-line policing, provincial sheriffs, firefighters, and border services staff) <sup>71</sup>                                                                   |
| British Columbia | <b>Phase 2 (Mar 15, 2021):</b> agri-food production workers (food processing plants, farms, nurseries, greenhouses, large industrial camps)<br><br><b>Phase 3 (Apr 2021):</b> first responders (police, firefighters, emergency transport), K-12 educational staff, childcare staff, grocery store workers, postal workers, bylaw and quarantine officers, manufacturing workers, wholesale/warehousing employees, staff living in congregate housing at places such as ski hills, correctional facilities staff, and cross-border transport staff |
| Manitoba         | <b>April 21, 2021:</b> police and firefighters aged 18+                                                                                                                                                                                                                                                                                                                                                                                                                                                                                            |

|             |                                                                                                                                                                                                                                                                                                                                                                                                                                                                                                                                                                                                                                                                                                                                                                                                                     |
|-------------|---------------------------------------------------------------------------------------------------------------------------------------------------------------------------------------------------------------------------------------------------------------------------------------------------------------------------------------------------------------------------------------------------------------------------------------------------------------------------------------------------------------------------------------------------------------------------------------------------------------------------------------------------------------------------------------------------------------------------------------------------------------------------------------------------------------------|
|             | <p><b>April 24:</b> community-based eligibility (<u>hot-spots</u>) available for essential workers aged 18+ working in childcare, school settings, food processing facilities, gas stations, grocery stores, food service, public health, and workplace safety roles</p> <p>Mid-June for second dose</p>                                                                                                                                                                                                                                                                                                                                                                                                                                                                                                            |
| Nova Scotia | <p><b>Phase 1:</b> workers in the Department of Community Services facilities (e.g. adult residential centres, regional rehabilitation centres, residential care facilities)</p> <p><b>Phase 2:</b> (a) workers in correctional facilities, shelters, and temporary workers' quarters; (b) workers involved in food security (e.g., large food-processing plant workers), frontline police officers; (c) migrant workers (e.g., truck drivers and rotational workers, excluding those travelling to and from New Brunswick).</p> <p><b>Not included in prioritization:</b> teachers, grocery store employees, migrant workers</p> <p><b>Certain essential workers removed from prioritization list in Apr 2021:</b> migrant workers (truck drivers, rotational workers) and agri-food processing plant workers.</p> |
| Ontario     | <p>Not initially prioritized in rollout strategy, but later included in late Phase 2:</p>                                                                                                                                                                                                                                                                                                                                                                                                                                                                                                                                                                                                                                                                                                                           |

|        |                                                                                                                                                                                                                                                                                                                                                                                                                                                                                                                                                                                                                                                                                                                                                                                                                                                                                                                    |
|--------|--------------------------------------------------------------------------------------------------------------------------------------------------------------------------------------------------------------------------------------------------------------------------------------------------------------------------------------------------------------------------------------------------------------------------------------------------------------------------------------------------------------------------------------------------------------------------------------------------------------------------------------------------------------------------------------------------------------------------------------------------------------------------------------------------------------------------------------------------------------------------------------------------------------------|
|        | <p><b>* Highest-risk group (April 29) – cannot work from home:</b> licensed childcare and educational workers who interact directly with children</p> <p><b>** Group 1 (May 6) – workers in critical essential services:</b> school staff and workers; individuals responding to critical events (e.g., police, firefighters, etc.); inspection workers in a variety of fields (food, border, buildings, etc.); funeral workers; food and agriculture workers, migrant workers</p> <p><b>*** Group 2 (May 11) – remaining essential workers:</b> essential (electricity, communications, etc.) and critical retail workers (grocery, postal services, passport services, financial services, etc.); courts and justice system workers; transportation, warehouse, and distribution workers; waste management workers; natural gas and mine workers; uranium processing workers; and veterinary service workers</p> |
| Quebec | <p><b>Priority Rank 9 (Apr 2021):</b> agri-food production workers, primary and secondary school and daycare staff, daycare workers, public safety workers (e.g., firefighters, police officers, correctional officers), people who work in slaughterhouses, temporary foreign farm workers, mining workers in remote areas, and workers in community organizations part of the <i>Programme de soutien aux organismes communautaires</i> (Support program for community organizations, PSOC)</p>                                                                                                                                                                                                                                                                                                                                                                                                                  |

|  |                                                                                  |
|--|----------------------------------------------------------------------------------|
|  | <b><i>Not included in prioritization:</i></b> grocery store workers and teachers |
|--|----------------------------------------------------------------------------------|

496

497 Provinces deviated from NACI guidelines in some notable ways due to local contextual factors.

498 Nova Scotia made another exception to its age-based prioritization strategy by prioritizing

499 essential workers who were not able to maintain public health guidelines effectively because of

500 the nature of their occupations<sup>52</sup>. However, certain NACI-recommended essential worker

501 categories were not included or were removed from prioritization (Table 4). According to KIs,

502 decisionmakers assessed that these subgroups would be vaccinated more efficiently through

503 age-based prioritization because of the province's small population size. In Quebec, grocery

504 store workers and teachers were not prioritized (Table 4). KIs explained that, due to limited

505 vaccine supply, Quebec prioritized older age groups followed by individuals at higher risk of

506 severe disease if infected. KIs indicated that decisionmakers found it difficult to justify

507 prioritizing occupations with younger average working ages, as they would likely have better

508 outcomes if infected over older individuals or those with underlying medical conditions.

509

510 *Individuals experiencing homelessness:*

511 As mentioned earlier, we were interested in how provinces prioritized shelter residents as well

512 as those with unstable housing situations. All provinces prioritized shelter residents in the

513 second phase of their vaccine rollout plans (Fig 1), consistent with NACI guidelines<sup>27</sup>, with

514 justifications provided in Table 3. Notably, Quebec did not initially prioritize individuals

515 experiencing homelessness, but later included them in their revised policy plan released in

516 March 2021. KIs reported that night curfews implemented across the province to curb



transmission led to the unintended consequence of outbreaks in congregate settings such as shelters. KIs for Nova Scotia confirmed that prioritization was based on age of shelter residents, as was consistent with the general provincial strategy.

### *Gaps in prioritization*

By contrast, individuals experiencing homelessness but not living in shelters were only prioritized in two provinces: Alberta and Ontario (Fig 1). KIs for Alberta confirmed that they intentionally defined individuals experiencing homelessness as ‘transient populations’ in their published policy plan to include both shelter and non-shelter residents. However, it remains unclear how well this was communicated to the public, as this definition was not explicitly stated in their rollout plan. Ontario explicitly mentioned prioritizing individuals living in encampments in Phase 2 (April 2021)<sup>70</sup>. KIs for other provinces did not provide rationales for overlooking this key subgroup, aside from admitting that it was a “hard-to-reach” population.

### *Individuals with disabilities:*

As mentioned earlier, we focused on individuals facing significant barriers to vaccination, which included those with developmental disabilities and those who were homebound with a disability. Of all our study populations, individuals with disabilities had the most variability in prioritization across provinces. Based on our findings, four provinces prioritized individuals with disabilities in their original vaccine rollout plans (Alberta, British Columbia, Manitoba, Ontario), adopting a tiered approach based on severity levels within this population (highest risk, high

risk, and at-risk)<sup>72–75</sup>. British Columbia followed NACI guidelines most closely by vaccinating those in institutionalized care in Phase 2, followed by those who were clinically extremely vulnerable due to their disability in Phase 3<sup>76</sup> (Fig 1). KIs for these provinces highlighted the importance of real-time risk data in informing their early prioritization strategy, revealing higher rates of hospitalizations, ICU admissions, death, and other severe outcomes among individuals with developmental delays or intellectual disabilities compared to the general population<sup>77,78</sup> (Table 3). In fact, despite being initially excluded from prioritization, Quebec later revised its rollout plan to include individuals with disabilities in April 2021 after reviewing real-time risk data<sup>79</sup> (see “Data Informed Prioritization Strategies” below).

Notably, Nova Scotia intentionally did not prioritize individuals with disabilities, despite evidence that Nova Scotia had a higher percentage of individuals living with a disability compared to other provinces<sup>54,80</sup>. KIs from Nova Scotia acknowledged the heightened risk experienced by those with disabilities but once again cited that the province assessed that its age-based rollout strategy would be more efficient at reaching this population than if they were to prioritize those with underlying medical conditions.

### *Gaps in prioritization*

Among provinces that prioritized individuals with disabilities, those who were homebound were often prioritized later, if at all, compared to those in institutionalized settings. Information on prioritization of homebound residents for vaccination was not easily available publicly, but KIs for all provinces, except Alberta, provided some useful insights. For instance, homebound

individuals in Manitoba began receiving prioritization in June 2021 through the Community Living Disability Services (CLDS), which provides services for individuals with both mental and physical disabilities in the province. It was, however, unclear if homebound individuals not eligible for CLDS received prioritization or transportation services. Ontario began offering services to assist homebound individuals (both at-home services as well as transporting them to vaccination sites) in Summer 2021, and Quebec included homebound individuals in their revised plan in April 2021. Although Nova Scotia did not specifically prioritize individuals with disabilities, KIs verified that government-initiated home vaccinations for individuals with mobility issues became available in April 2021. Finally, British Columbia offered transportation services for homebound individuals upon request, although no specific timeline was provided.

Objective 2: Identify contextual factors that influenced how provinces selected priority populations for early COVID-19 vaccine access.

The prioritization of vaccines varied across provinces due to contextual factors specific to each region. Factors such as population demographics and geography led to the realization that no single approach, including those recommended by NACI, could be uniformly applied across all provinces. Through KI interviews, three factors emerged as significant drivers for the selection of priority populations and the corresponding timelines for early COVID-19 vaccine distribution: Data Availability, Population Size, and Geography.

## Data Availability

Data availability often influenced whom provinces chose to prioritize and when. Provinces looked to data to determine how populations might be disproportionately negatively impacted by COVID-19 or how they experience barriers to vaccine uptake. However, presence or absence of data presented a dual role, either enabling the prioritization of key populations or preventing certain populations from receiving vaccine priority despite their high-risk level.

## Data-Informed Prioritization Strategies

The scarcity of vaccines and the severe health risks posed by COVID-19<sup>81</sup> led to public concerns and different groups requesting to be prioritized for vaccination<sup>82–85</sup>. KI interviews and our environmental scans revealed that decision makers faced immense pressure when prioritizing certain groups over others<sup>84–90</sup>. Data gave decision makers a seemingly objective and scientific tool for answering questions such as identifying individuals most likely to contract COVID-19, those facing barriers to vaccine accessibility, and those at higher risk of severe outcomes.

For instance, Ontario employed a data-driven approach by prioritizing individuals residing in geographical “hot spot” communities, identified through historic and ongoing infectious disease trends, as previously described<sup>98</sup>. The province aimed to lower the disproportionate impacts of COVID-19 on racialized urban populations, individuals living in multigenerational households, and essential workers in non-healthcare settings through this approach<sup>91,92</sup>.

Data-driven approaches also influenced the prioritization of First Nations groups across several provinces. In Manitoba, for example, a KI highlighted that previous publications on the disproportionate negative health impacts of the 2009 H1N1 Swine Flu pandemic on First Nations<sup>93,94</sup> were leveraged by the First Nations Health and Social Secretariat of Manitoba to successfully highlight the disproportionate risk this community faced for negative COVID-19 outcomes. This knowledge informed the province's decision to prioritize First Nations groups in early February, one of the earliest prioritized groups in Manitoba (Fig 1).

In Quebec, the decision to prioritize vaccination of individuals with disabilities evolved during the rollout as a result of real-time scientific evidence. This group was not listed in the province's initial rollout plan released in January 2021 because Quebec's Ministry of Health and Social Services concluded that there was insufficient evidence of an increased risk of COVID-19 infection for this population<sup>95-97</sup>. KIs from Quebec verified this sentiment, explaining that the Ministry initially found no evidence that vaccinating early would provide a noticeable benefit. However, real-time scientific data that severe outcomes among individuals with developmental delays or intellectual disabilities were higher compared to the general population proved instrumental in changing the province's stance on prioritization<sup>77,78</sup>. Quebec later revised its plan to prioritize both individuals with disabilities living in group homes in March 2021 and those living at home with families in April 2021<sup>98</sup>.

## Limitations of Data Availability

Data availability was, however, not equitable across all population groups in Canada. The quality and quantity of data varied across population groups, leading to inequities in identifying who required prioritization. Inconsistent data availability for Inuit and Métis populations in Canada meant that these groups were not always prioritized when First Nations were, despite knowledge that they experienced similarly high risk for barriers to vaccine access and negative health outcomes<sup>99</sup>. In Manitoba, while First Nations were prioritized as early as February 2021, Inuit and Métis populations were not, despite experiencing similar disproportionate health consequences during the pandemic<sup>99</sup>. Key informants from other provinces reported similar variations in prioritization for First Nation, Métis, and Inuit populations.

We had wonderful data demonstrating that First Nations people in Manitoba were experiencing more significant harms related to COVID and at a much younger age. We knew, for example, that First Nations people who died of COVID were dying, on average, 17 years earlier than non-First Nations people. That allowed us very early on to advocate to government to have a 20-year age differential when it came to eligibility for the vaccine.

-Key Informant from Manitoba (ID 698)

Key informants revealed that First Nations organizations in Manitoba had established data-sharing agreements and structures before the COVID-19 pandemic with the Manitoba government. These agreements facilitated data access for the province, through the lens of

First Nations Principles of ownership, control, access, and possession (OCAP). OCAP are a set of standards that ensure First Nations have authority over how their data is collected, used, and shared, emphasizing self-determination and data sovereignty. These pre-established agreements and structures allowed for data availability that facilitated vaccine prioritization for First Nation groups. However, similar processes were not in place for Métis data in Manitoba. Provincial representatives presented the lack of provincial data on Métis populations as a reason why Métis and Inuit populations were not prioritized at the same time as First Nations groups. After much advocacy from Métis groups, Métis and Inuit populations were eventually prioritized in May of 2021<sup>100</sup>.

... the province said there wasn't sufficient data to suggest that Métis and Inuit were experiencing significantly worse outcomes in terms of COVID infection and outcomes associated with COVID for them to be included in the prioritization. So, for Inuit, it was, "Well there's just so few." And then, Métis, it was, "Well we don't have data to really tell us that their outcomes are significantly worse than the general population." That was the nature of the discussions a year ago when all this started.

-Key Informant from Manitoba (ID 613)

An interviewee from Alberta explained that these disparities in health data availability for Métis populations stemmed from the Federal government's prioritization of data-sharing agreements with First Nations, as they fall under Federal jurisdiction through the Indian Act. Métis people

do not fall under federal jurisdiction, despite being section 35 recognized (one of the three indigenous peoples of Canada)<sup>101</sup>, resulting in Métis and Inuit people being left to navigate agreements with their provincial health authorities without support from the Federal government. In contrast, the Métis Nation of Alberta negotiated an information-sharing agreement with Alberta Health in 2010, so all FNIM populations were simultaneously prioritized for the COVID-19 vaccine.

Limited data availability on important FNIM subgroups also hindered the efficiency of the rollout and impacted the trust between FNIM populations and provincial governments. As mentioned earlier, urban FNIM were not explicitly prioritized in most provinces. KIs for Ontario shared that the urban FNIM population was a critical subgroup that was missed due to a lack of sufficient data on urban population size, risk, and the health inequities faced by this group. KIs emphasized that the majority of FNIM peoples in Canada now live in cities yet were significantly undercounted in the 2016 census (e.g. by a factor of 2 to 4 in a Toronto-based study)<sup>68,102</sup>. They explained that, since historic partnerships of trust with FNIM communities had not been established prior to the pandemic, urban FNIM were considered “hard-to-reach” populations for COVID-19 vaccination and were, therefore, not efficiently prioritized early on in the rollout. Once again, strong advocacy from FNIM community leaders was required to include them in the prioritization plan.



## Population Size

Population size influenced vaccine rollout and prioritization strategies at both the interprovincial and intraprovincial levels. Interprovincial population sizes refer to variations in population across Canadian provinces, while intraprovincial population size refers to the differences in size of population subgroups within a given province. These population sizes played a crucial role in determining which groups were deemed feasible to prioritize and shaped overall vaccine distribution strategies on a large scale.

## Interprovincial Population Dynamics and Vaccine Rollout

Provincial population sizes influenced the perceived logistical benefits of implementing prioritization strategies beyond age-based categories. All provinces prioritized their populations based on age, the most significant risk factor for adverse COVID-19 outcomes and aligned with NACI recommendations<sup>21</sup>. However, the differentiation among provinces was the additional layers of prioritizations for certain groups apart from age. Some provinces considered their population size too small to further specify and prioritize specific population groups. As discussed earlier, KIs from Nova Scotia, for instance, revealed that the province determined that focusing on age-based prioritization would be more efficient because of the narrow time-spacing between age groups caused by the province's relatively small population. Decision makers believed that introducing additional prioritized groups would require more time and resources, whereas prioritizing solely based on age could be implemented more swiftly and effectively.

## Intraprovincial Population Variability and Prioritization Strategies

In the case of specific ethno-racial communities, such as Black populations, some provinces found these subgroups too small in their province to justify targeting for vaccination. For Black Canadians, this sentiment is reflected in the data. More than half (52.4%) of Canada's Black population live in Ontario, followed by Quebec housing the second-largest population<sup>64</sup>. While the prairie provinces have witnessed a rapid growth rate among the Black population, provinces like British Columbia experienced slower growth<sup>64</sup>. Therefore, it is unsurprising that KIs from British Columbia referenced small population size as a reason why Black populations were not explicitly targeted, instead opting for community-based vaccine campaigns that targeted racialized groups in areas known to have a higher proportion of racialized individuals, recent immigrants, and refugees, referred to as Inclusion Groups. Additionally, the province focused on healthcare frontline worker groups, recognizing the overrepresentation of racialized workers in privatized healthcare settings. Conversely, in Toronto, a city in Ontario where 70.4% of Ontario's Black population resides, there were Black-Led Vaccine Clinics, known as the Black Health Vaccine Initiative, organized by the Black Physicians' Association of Ontario (BPAO) and several other local Black healthcare organizations<sup>88,103</sup>, with the goal of reducing barriers to vaccine uptake. This was in addition to Black communities being targeted through "hot spot" communities in Ontario.

Even when provinces did prioritize small population groups, health officials acknowledged that it may have led to suboptimal outreach efforts. In British Columbia, for example, Inuit populations were targeted for prioritization, despite making up less than 0.01% of the

population (0.6% of the FNIM population in British Columbia) in 2016<sup>104</sup>. However, a KI stated that outreach efforts were not as organized and effective as they could have been because of the low representation.

Lastly, KIs noted that population size influenced the representation of certain population groups in terms of their ability to advocate effectively to government. In the early stages of the pandemic, several groups were prioritized because of their ability to gather, advocate, and be heard. However, smaller subpopulations lacked the same numbers and resources to advocate for prioritization or even recognition. For instance, when the Métis and Inuit were initially not prioritized alongside First Nations in Manitoba, the Manitoba Métis Federation had sufficient representation and resources to gather and advocate for their inclusion<sup>99,100</sup>. However, numerous other groups did not have had the same representation or resources.

*I sat three days a week with provincial chief medical officers of health in this discussion and listened to other populations ... emergency workers, police, fire, ambulance healthcare workers, teachers, others who came together and lobbied very strongly to be identified as priority populations. The advantage we had was the [First Nations] surveillance data. We could bring that to those discussions and those tables on an almost daily basis. I presented it nationally as well to say [that] this is what made our population different and that the planned response needed to be different.*

*-Key Informant from British Columbia (ID 301)*

## Geography

The geography of certain provinces also presented a logistical challenge in vaccinating and providing care to the many remote communities within Canada. Canada is the second largest country in the world by land mass, yet its land is largely uninhabited<sup>105</sup>. Most people live in the southern part of the country, near the American border<sup>105</sup>. This vast geography, coupled with a relatively small population, has led to the formation of many remote and isolated communities that are hours, if not days, away from urban centres or resources. Some communities are so remote that they require dog sleds, snowmobiles, and air services to transport medical supplies from airports to the communities that need them<sup>106</sup>.

Geographical isolation had divergent effects on provincial strategies for prioritizing remote and rural communities during the early stages of vaccine rollouts. It either presented obstacles to effective prioritization or provided a rationale for early prioritization.

In the early stages of vaccination, the COVID-19 vaccines available were delicate and required ultra-cold storage conditions. In provinces with rural and remote communities lacking the necessary infrastructure to transport and store vaccines under the required conditions, providing vaccines to these communities became a challenge. Instead, these provinces focused their attention on establishing vaccination centres within facilities that could appropriately store and disseminate early versions of the COVID-19 vaccines. As a result, provinces like Alberta and Manitoba faced limitations in effectively prioritizing remote and rural populations, including on-reserve FNIM communities.

774

775

*The transportation issue had to do with the fact that these vaccines are fairly*

776

*fragile for transportation. They don't like to be agitated too much and they*

777

*like to be super cold. Those two things also meant that in the early days, until*

778

*we had the infrastructure in place to do good transportation, we had to limit*

779

*the number of places where you could provide the vaccine.*

780

*- Key Informant from Alberta (ID 672)*

781

782

On the other hand, KIs from other provinces referenced geographical isolation as a reason why

783

remote communities were prioritized. Due to their closed and isolated nature, a COVID-19

784

outbreak could spread quickly and limited access to specialized services and health resources

785

could result in severe COVID-19 related health outcomes. Thus, provinces like British Columbia

786

regarded geographic isolation as a driving factor for prioritizing vaccination efforts in remote

787

communities.

788

## Discussion

789

Our findings highlight the use of multi-phased approaches by several provinces, many of which

790

tailored prioritization to their local contexts considering vaccine shortages. These adaptations

791

were driven by factors such as vaccine availability, population distribution, the quality of data

792

available, and the influence of community advocacy groups.

793

794

Multiple reviews highlight a dearth of scientific literature on strategies, interventions, and

795

factors influencing equity in COVID-19 vaccination<sup>107</sup>. Our study contributes to this gap by

revealing, through our literature search and KI interviews, how provinces made context-driven decisions that reflected the information at hand, the needs of their populations, and the constraints they faced. However, there are key learnings that could be applied to allow for more equity-driven future rollouts. These insights revolve around how data availability and population size can influence prioritization, requiring provinces and territories to critically consider how these two factors impact vaccine rollout.

Adopting a critical approach to understanding what data is available for decision-making, and why, is crucial to avoiding perpetuated inequities resulting from data availability. This approach entails an examination of the processes and factors that determine how and if data is collected, including consideration of potential biases or exclusion of demographic groups from data being published<sup>108–110</sup>. Additionally, to combat the issue of a lack of data, health officials and governing bodies could prioritize the collection of socio-demographic and race-based data<sup>110</sup>. Historically marginalized groups are often the ones who face the negative repercussions of insufficient population-specific data<sup>108,109,111,112</sup>, such as the under-screening of Black Canadian women for cancer despite evidence of their heightened vulnerability to worse outcomes<sup>111</sup>. Our findings echo this issue, revealing that inadequate data on populations led to limited prioritization early in the pandemic. This challenge was exacerbated by a lack of political will to bridge the data gap at the beginning of the pandemic through the collection of race-based data at vaccination, prompting an open letter to the Government of Ontario advocating for race-based data collection<sup>110,113</sup>.

Similarly, data governance issues, particularly the absence of data-sharing agreements among Métis groups, posed challenges to the prioritization of Métis populations in Alberta, Manitoba, and Nova Scotia. When considering whether to prioritize Métis groups, and other historically marginalized groups, based on available data, it is crucial to pause and inquire into why data may be absent and what assumptions decision-makers might be making due to this data gap<sup>99,108,112</sup>. A further step would be to consider how these data gaps could be filled. Relying solely on the data at hand for prioritization can be insufficient and potentially harmful, as it may perpetuate established systemic forms of exclusion.

Interviews with KIs also underscore the influence of population size and geography on COVID-19 vaccine rollout and prioritization in Canadian provinces. While all provinces prioritized based on age, additional layers of prioritization were contingent on perceived feasibility, with some provinces deeming their total population size too small to warrant further prioritization metrics that went beyond age. However, only prioritizing based age could further marginalize already disadvantaged groups. COVID-19 related hospitalization and mortality is disproportionately higher among Black, FNIM, and other racialized communities<sup>114,115</sup>. Additionally, these populations tend to be younger<sup>64,116,117</sup>. As a result, studies have indicated that COVID-19 vaccine prioritization based solely on age benefits older, white populations at the expense of younger, Black, FNIM, and other racialized communities<sup>118</sup>.

Further, studies suggest that an effective vaccine prioritization strategy should adopt an intersectional and dynamic approach<sup>29,119</sup> that considers the proportion of susceptible

individuals in a community, including those more likely to contract the virus or who have not been previously infected<sup>119</sup>. This approach would also consider individuals with multiple risk factors, geographic and occupational risk exposures, and how intersecting identities may affect risk levels<sup>29</sup>. An effective vaccine strategy should be adaptable, continually adjusting to the evolving landscape of risk factors, exposures, and susceptibilities<sup>119</sup>. The size of populations also impacted advocacy efforts, with larger groups having more resources and influence, as seen in the prioritization of Métis and Inuit alongside First Nations in Manitoba due to the Manitoba Métis Federation's effective advocacy. Smaller subpopulations faced difficulties in garnering recognition and prioritization during the early stages of the pandemic. Moving forward, it would be prudent to consider what populations may not be heard or prioritized because of a lack of visibility or resources.

## Strengths and Limitations

This paper offers a comprehensive examination of provincial prioritization plans and justifications provided, aimed at ensuring equitable access to and uptake of COVID-19 vaccines for five key populations in Canada at high risk of negative outcomes and/or barriers to vaccine access. A major strength of our study is our direct engagement with key decision-makers who played pivotal roles in shaping provincial vaccination policies and strategies. By interviewing these individuals, we gained unique insights into the thought processes, considerations, and challenges that informed the development and implementation of vaccination plans at the provincial level.



While our research aimed to be comprehensive and representative of all Canadian jurisdictions, there were limitations. First, our study focused on six provinces due to availability of published documents during the study period, potentially overlooking valuable insights from excluded provinces and territories. Nevertheless, we sought to encompass provinces with diverse geographical, demographic, and linguistic characteristics to ensure a broader representation of Canadian contexts. Second, we only interviewed a few KIs per province; therefore, the perspectives gathered may not represent those of the entire province. However, we conducted interviews until saturation was reached and aimed to capture a range of perspectives from key decision-makers involved in vaccine rollout efforts. Third, while our qualitative interviews and environmental scans aimed to capture all relevant strategies and interventions, it is possible that some initiatives may have been overlooked if they were not publicly accessible when environmental scans were completed nor mentioned by our KIs, despite our efforts to keep our environmental scans as up-to-date as possible. Additionally, NACI guidelines and provincial policy plan documents were regularly updated throughout the course of the rollout. This proved to be challenging when asking KIs to recall prioritization decisions that were made at the planning phase. To mitigate these challenges, our team regularly verified and recorded policy updates by date during the study period.

Moving forward, future research endeavors should expand beyond the scope of this study to evaluate the other four dimensions of the RE-AIM implementation framework for assessing vaccine rollout initiatives, including effectiveness, adoption, implementation, and maintenance. Moreover, the active involvement of priority populations in research design and interpretation

will be crucial for ensuring that future vaccination efforts align with the needs and perspectives of diverse communities.

## Conclusion

Our work delves into the equitable distribution of COVID-19 vaccines across six Canadian provinces, revealing nuanced variations driven by factors such as vaccine availability, demographics, and early community-led partnerships. It examines how provincial policies allowed tailored local responses that addressed NACI's equity-informed recommendations. Our research fills gaps in the literature by elucidating the context-driven decision-making behind vaccine prioritization, emphasizing the need for expanded data availability to include socio-demographic and race-based data. Our findings provide key learnings for equitable vaccine distribution in future mass vaccination emergency situations in Canada and globally.

## Acknowledgements

We extend our sincere gratitude to our key informants for sharing their invaluable time and perspectives in this study. We also wish to thank the Implementation Science Trainee Cluster, along with the professors and students at the Dalla Lana School of Public Health, University of Toronto, for their mentorship and feedback, which were instrumental in shaping this work.

## References

1. Liang, S. T., Liang, L. T., & Rosen, J. M. (2021). COVID-19: a comparison to the 1918 influenza and how we can defeat it. *Postgraduate Medical Journal*, 97(1147), 273.  
<https://doi.org/10.1136/POSTGRADMEDJ-2020-139070>
2. Wouters, O. J., Shadlen, K. C., Salcher-Konrad, M., Pollard, A. J., Larson, H. J., Teerawattananon, Y., & Jit, M. (2021). Challenges in ensuring global access to COVID-19 vaccines: production, affordability, allocation, and deployment. *Health Policy* *Www.TheLancet.Com*, 397. [https://doi.org/10.1016/S0140-6736\(21\)00306-8](https://doi.org/10.1016/S0140-6736(21)00306-8)
3. *Summary of evidence supporting COVID-19 public health measures - Canada.ca*. (n.d.). Retrieved August 4, 2024, from <https://www.canada.ca/en/public-health/services/diseases/2019-novel-coronavirus-infection/guidance-documents/summary-evidence-supporting-covid-19-public-health-measures.html>
4. Rachel Aiello. (2021, February 4). *Coronavirus: Canada to keep feeling impacts of vaccine delivery issues in coming shipments: Fortin*. CTV News.  
<https://www.ctvnews.ca/health/coronavirus/canada-to-keep-feeling-impacts-of-covid-19-vaccine-delivery-issues-fortin-1.5295698>
5. Goldstein, L. (2021, April 21). *Vaccine shortage means longer pandemic for Canada*. Toronto Sun. <https://torontosun.com/opinion/columnists/goldstein-vaccine-shortage-means-longer-pandemic-for-canada>
6. Slaughter, G. (2021, January 26). *Explained: What the Pfizer shortage means for Canada's vaccine rollout*. CTV News. <https://www.ctvnews.ca/health/coronavirus/explained-what-the-pfizer-shortage-means-for-canada-s-vaccine-rollout-1.5283261>

7. Pfizer. (2021, February 19). *Pfizer and BioNTech Submit COVID-19 Vaccine Stability Data at Standard Freezer Temperature to the U.S. FDA*. <https://www.pfizer.com/news/press-release/press-release-detail/pfizer-and-biontech-submit-covid-19-vaccine-stability-data>
8. Kis, Z. (2022). Stability Modelling of mRNA Vaccine Quality Based on Temperature Monitoring throughout the Distribution Chain. *Pharmaceutics*, 14(2).  
<https://doi.org/10.3390/PHARMACEUTICS14020430>
9. Uddin, M. N., & Roni, M. A. (2021). Challenges of Storage and Stability of mRNA-Based COVID-19 Vaccines. *Vaccines*, 9(9). <https://doi.org/10.3390/VACCINES9091033>
10. CBC News. (2021, May 19). *Canada's change to Pfizer vaccine storage temperature has major implications on rollout*. <https://www.cbc.ca/news/health/pfizer-vaccine-canada-storage-temperature-1.6031823>
11. CBC News. (2020, November 11). *Why rollout of COVID-19 vaccine could be "the most difficult part" in Canada*. <https://www.cbc.ca/news/health/coronavirus-canada-covid-19-vaccine-rollout-1.5797082>
12. CBC Radio. (2020, November 29). *What transporting ice cream across Canada tells us about vaccine logistics*. <https://www.cbc.ca/radio/costofliving/cold-chain-logistics-difficult-decisions-and-the-changing-demands-sex-workers-face-from-covid-19-1.5820072/what-transporting-ice-cream-across-canada-tells-us-about-vaccine-logistics-1.5820080>
13. Canadian Public Health Association. (2021, December 14). *Health organizations and professionals call on Government of Canada to live up to commitments on vaccine equity*. <https://www.cpha.ca/health-organizations-and-professionals-call-government-canada-live-commitments-vaccine-equity>

14. Stephanie Dubois. (2021, December 3). *Canada should focus on vaccine equity — not travel bans — human rights advocate, doctors say | CBC News*. CBC News.  
<https://www.cbc.ca/news/health/vaccine-equity-canada-1.6268609>
15. van der Graaf, R., Browne, J. L., & Baidjoe, A. Y. (2022). Vaccine equity: Past, present, and future. *Cell Reports Medicine*, 3(3), 100551. <https://doi.org/10.1016/J.XCRM.2022.100551>
16. United Nations. (2021, February 17). *Secretary-General Calls Vaccine Equity Biggest Moral Test for Global Community, as Security Council Considers Equitable Availability of Doses | Meetings Coverage and Press Releases*. <https://press.un.org/en/2021/sc14438.doc.htm>
17. Fidler, D. P. (2010). Negotiating Equitable Access to Influenza Vaccines: Global Health Diplomacy and the Controversies Surrounding Avian Influenza H5N1 and Pandemic Influenza H1N1. *PLOS Medicine*, 7(5), e1000247.  
<https://doi.org/10.1371/JOURNAL.PMED.1000247>
18. Government of Canada. (2023, July 4). *COVID-19: Canada's Global Initiative for Vaccine Equity*. [https://www.international.gc.ca/world-monde/issues\\_developpement-enjeux\\_developpement/global\\_health-sante\\_mondiale/equite\\_vaccinale\\_covid-19\\_vaccine\\_equity.aspx?lang=eng](https://www.international.gc.ca/world-monde/issues_developpement-enjeux_developpement/global_health-sante_mondiale/equite_vaccinale_covid-19_vaccine_equity.aspx?lang=eng)
19. Moore, S., Hill, E. M., Dyson, L., Tildesley, M. J., & Keeling, M. J. (2024). Retrospectively modeling the effects of increased global vaccine sharing on the COVID-19 pandemic. *Nature Medicine*, 28, 2416–2423. <https://doi.org/10.1038/s41591-022-02064-y>
20. World Health Organization. (2021, July 20). *No one is safe from COVID-19 until everyone is safe*. <https://www.who.int/news-room/photo-story/photo-story-detail/No-one-is-safe-from-COVID19-until-everyone-is-safe>

21. National Advisory Committee on Immunization. (2020). Appendix D: Equity matrix applied to COVID-19 with evidence to date. In *Vaccine* (Vol. 38, Issue 36). Elsevier Ltd.  
<https://doi.org/10.1016/J.VACCINE.2020.05.051>
22. Government of Canada. (2019, September 17). *Canada's Health Care System - Canada.ca*.  
<https://www.canada.ca/en/health-canada/services/health-care-system/reports-publications/health-care-system/canada.html>
23. Ismail, S. J., Hardy, K., Tunis, M. C., Young, K., Sicard, N., & Quach, C. (2020). A framework for the systematic consideration of ethics, equity, feasibility, and acceptability in vaccine program recommendations. *Vaccine*, 38(36), 5876.  
<https://doi.org/10.1016/J.VACCINE.2020.05.051>
24. *Archived 5: NACI rapid response: Extended dose intervals for COVID-19 vaccines to optimize early vaccine rollout and population protection in Canada [2021-03-03] - Canada.ca*. (n.d.). Retrieved July 4, 2024, from <https://www.canada.ca/en/public-health/services/immunization/national-advisory-committee-on-immunization-naci/rapid-response-extended-dose-intervals-covid-19-vaccines-early-rollout-population-protection.html>
25. *Archived: Preliminary guidance on key populations for early COVID-19 immunization [2020-11-03] - Canada.ca*. (n.d.). Retrieved July 4, 2024, from <https://www.canada.ca/en/public-health/services/immunization/national-advisory-committee-on-immunization-naci/guidance-key-populations-early-covid-19-immunization.html>
26. *Archived: Guidance on the prioritization of initial doses of COVID-19 vaccine(s) [2020-12-18] - Canada.ca*. (n.d.). Retrieved July 4, 2024, from <https://www.canada.ca/en/public-health/services/immunization/national-advisory-committee-on-immunization-naci/guidance-prioritization-initial-doses-covid-19-vaccine-s.html>

health/services/immunization/national-advisory-committee-on-immunization-naci/guidance-prioritization-initial-doses-covid-19-vaccines.html

27. *Archived: Guidance on the prioritization of key populations for COVID-19 immunization*

[2021-02-12] - Canada.ca. (n.d.). Retrieved July 4, 2024, from

<https://www.canada.ca/en/public-health/services/immunization/national-advisory-committee-on-immunization-naci/guidance-prioritization-key-populations-covid-19-vaccination.html>

28. AlShurman, B. A., Tetui, M., Nanyonjo, A., Butt, Z. A., Waite, N. M., Vernon-Wilson, E., Wong, G., & Grindrod, K. (2023). Understanding the COVID-19 Vaccine Policy Terrain in Ontario Canada: A Policy Analysis of the Actors, Content, Processes, and Context. *Vaccines*, 11(4), 782. <https://doi.org/10.3390/VACCINES11040782>

29. McAlister, F. A., Bushnik, T., Leung, A. A., & Saxinger, L. (2021). Informing COVID-19 vaccination priorities based on the prevalence of risk factors among adults in Canada. *CMAJ*, 193(17), E617–E621. <https://doi.org/10.1503/CMAJ.210529/TAB-RELATED-CONTENT>

30. Bashir, K., Ouedraogo, M., Dharma, C., Sobers, M., Atukorale, V., Mauer-Vakil, D., Ataulhjan, A., Fadel, S., & Allin, S. (2024). Strengthening access to and confidence in COVID-19 vaccines among equity-deserving populations across Canada: An exploratory qualitative study . *[Manuscript Submitted for Publication]*.

31. Mauer-Vakil, D., Dharma, C., Sobers, M., Kainat Bashir, M. , Vajini Atukorale, M. , & Ouedraogo, M. (2023). Lessons Learned Conducting Implementation Science Research on

- 1009 the COVID-19 Vaccination Rollout During a Global Pandemic. *Healthy Populations Journal*,  
1010 3(4). <https://doi.org/10.15273/HPJ.V3I4.11588>
- 1011 32. Tong, A., Sainsbury, P., & Craig, J. (2007). Consolidated criteria for reporting qualitative  
1012 research (COREQ): a 32-item checklist for interviews and focus groups. *International*  
1013 *Journal for Quality in Health Care*, 19(6), 349–357.  
1014 <https://doi.org/10.1093/intqhc/mzm042>
- 1015 33. Grant, T. (2023, December 17). *N.S. Black health and wellness clinics aim to break down*  
1016 *health inequities*. CBC News. [https://www.cbc.ca/news/canada/nova-scotia/nova-scotia-](https://www.cbc.ca/news/canada/nova-scotia/nova-scotia-black-health-wellness-clinics-1.7062078)  
1017 [black-health-wellness-clinics-1.7062078](https://www.cbc.ca/news/canada/nova-scotia/nova-scotia-black-health-wellness-clinics-1.7062078)
- 1018 34. Smith, E. (2021, April 8). *N.S. holds first vaccine clinic in Black Nova Scotian community*. CBC  
1019 News. [https://www.cbc.ca/news/canada/nova-scotia/african-nova-scotian-vaccine-clinic-](https://www.cbc.ca/news/canada/nova-scotia/african-nova-scotian-vaccine-clinic-shots-upper-hammonds-planes-1.5979749)  
1020 [shots-upper-hammonds-planes-1.5979749](https://www.cbc.ca/news/canada/nova-scotia/african-nova-scotian-vaccine-clinic-shots-upper-hammonds-planes-1.5979749)
- 1021 35. Smith, E. (2021, April 8). *N.S. holds first vaccine clinic in Black Nova Scotian community*. CBC  
1022 News. [https://www.cbc.ca/news/canada/nova-scotia/african-nova-scotian-vaccine-clinic-](https://www.cbc.ca/news/canada/nova-scotia/african-nova-scotian-vaccine-clinic-shots-upper-hammonds-planes-1.5979749)  
1023 [shots-upper-hammonds-planes-1.5979749](https://www.cbc.ca/news/canada/nova-scotia/african-nova-scotian-vaccine-clinic-shots-upper-hammonds-planes-1.5979749)
- 1024 36. Naderifar, M., Goli, H., & Ghaljaie, F. (2017). Snowball Sampling: A Purposeful Method of  
1025 Sampling in Qualitative Research. *Strides in Development of Medical Education*, 14(3).  
1026 <https://doi.org/10.5812/SDME.67670>
- 1027 37. Gaglio, B., Shoup, J. A., & Glasgow, R. E. (2013). The RE-AIM framework: a systematic review  
1028 of use over time. *American Journal of Public Health*, 103(6).  
1029 <https://doi.org/10.2105/AJPH.2013.301299>



- 1030 38. Shaw, R. B., Sweet, S. N., McBride, C. B., Adair, W. K., & Martin Ginis, K. A. (2019).  
1031 Operationalizing the reach, effectiveness, adoption, implementation, maintenance (RE-  
1032 AIM) framework to evaluate the collective impact of autonomous community programs  
1033 that promote health and well-being. *BMC Public Health*, 19(1), 1–14.  
1034 <https://doi.org/10.1186/S12889-019-7131-4/TABLES/1>
- 1035 39. Thorne, S. E. (Sally E. (2016). *Interpretive description : qualitative research for applied*  
1036 *practice* (2nd ed.). Routledge. [https://www.routledge.com/Interpretive-Description-](https://www.routledge.com/Interpretive-Description-Qualitative-Research-for-Applied-Practice/Thorne/p/book/9781629582993)  
1037 [Qualitative-Research-for-Applied-Practice/Thorne/p/book/9781629582993](https://www.routledge.com/Interpretive-Description-Qualitative-Research-for-Applied-Practice/Thorne/p/book/9781629582993)
- 1038 40. Azungah, T. (2018). Qualitative research: deductive and inductive approaches to data  
1039 analysis. *Qualitative Research Journal*, 18(4), 383–400. [https://doi.org/10.1108/QRJ-D-18-](https://doi.org/10.1108/QRJ-D-18-00035)  
1040 [00035](https://doi.org/10.1108/QRJ-D-18-00035)
- 1041 41. John W. Creswell. (2012). *Educational research: Planning, conducting, and evaluating*  
1042 *quantitative and qualitative research* (4th ed.). Pearson.
- 1043 42. Charrier, L., Garlasco, J., Thomas, R., Gardois, P., Bo, M., & Zotti, C. M. (2022). An Overview  
1044 of Strategies to Improve Vaccination Compliance before and during the COVID-19  
1045 Pandemic. *International Journal of Environmental Research and Public Health*, 19, 11044.  
1046 <https://doi.org/10.3390/ijerph191711044>
- 1047 43. Alberta Health Services. (2021). *Appropriate Prioritization of Access to Health Services*.  
1048 [www.ahs.ca](http://www.ahs.ca),
- 1049 44. British Columbia Centre for Disease Control & British Columbia Ministry of Health. (2020).  
1050 *COVID-19 Ethical Decision-Making Framework*.

- 1051 45. Government of Manitoba. (2021). *COVID-19 VACCINATION IN MANITOBA TASK FORCE*  
1052 *UPDATE*. [https://manitoba.ca/asset\\_library/en/covid/vaccination-modelling-01202021.pdf](https://manitoba.ca/asset_library/en/covid/vaccination-modelling-01202021.pdf)
- 1053 46. Covid-, O., & Distribution Task Force, V. (n.d.). *Ethical Framework for COVID-19 Vaccine*  
1054 *Distribution*.
- 1055 47. Erickson, L. J., De Wals, P., & Farand, L. (2005). An analytical framework for immunization  
1056 programs in Canada. *Vaccine*, 23(19), 2470–2476.  
1057 <https://doi.org/10.1016/J.VACCINE.2004.10.029>
- 1058 48. Ministère de la Santé et des Services sociaux. (2021, March 3). *Pandémie de la COVID-19 -*  
1059 *Un intervalle de 16 semaines entre les deux doses de vaccin*.  
1060 <https://www.msss.gouv.qc.ca/ministere/salle-de-presse/communique-2676/>
- 1061 49. Government of Canada. (2021, October 22). *Recommendations on the use of COVID-19*  
1062 *vaccines*. [https://www.canada.ca/en/public-health/services/immunization/national-](https://www.canada.ca/en/public-health/services/immunization/national-advisory-committee-on-immunization-naci/recommendations-use-covid-19-vaccines.html)  
1063 [advisory-committee-on-immunization-naci/recommendations-use-covid-19-vaccines.html](https://www.canada.ca/en/public-health/services/immunization/national-advisory-committee-on-immunization-naci/recommendations-use-covid-19-vaccines.html)
- 1064 50. Miller, A. (2021, March 6). *A behind-the-scenes look at why Canada delayed 2nd doses of*  
1065 *COVID-19 vaccines*. CBC News. [https://www.cbc.ca/news/health/canada-covid-19-vaccine-](https://www.cbc.ca/news/health/canada-covid-19-vaccine-delay-risk-1.5939134)  
1066 [delay-risk-1.5939134](https://www.cbc.ca/news/health/canada-covid-19-vaccine-delay-risk-1.5939134)
- 1067 51. Government of Nova Scotia. (2021, January 5). *Update on Nova Scotia's COVID-19*  
1068 *Immunization Plan*. News Release. [https://news.novascotia.ca/en/2021/01/05/update-](https://news.novascotia.ca/en/2021/01/05/update-nova-scotias-covid-19-immunization-plan)  
1069 [nova-scotias-covid-19-immunization-plan](https://news.novascotia.ca/en/2021/01/05/update-nova-scotias-covid-19-immunization-plan)
- 1070 52. Government of Nova Scotia. (2021, February 3). *Update on Nova Scotia's COVID-19*  
1071 *Immunization Plan*. News Release. [https://news.novascotia.ca/en/2021/02/03/update-](https://news.novascotia.ca/en/2021/02/03/update-nova-scotias-covid-19-immunization-plan)  
1072 [nova-scotias-covid-19-immunization-plan](https://news.novascotia.ca/en/2021/02/03/update-nova-scotias-covid-19-immunization-plan)

- 1073 53. Habbick, M., Allin, S., Camillo, C. A., Fitzpatrick, T. A., Mauer-Vakil, D., Muhajarine, N.,  
1074 Roerig, M., & Rowein, S. (2022). COVID-19 Vaccination Rollout: Nova Scotia. CoVaRR-Net  
1075 and North American Observatory on Health Systems and Policies. *COVID-19 Vaccination*  
1076 *Rollout Monitor*.
- 1077 54. Sullivan, N. (2021, March 7). *Disabled Nova Scotians question why they can't get early*  
1078 *COVID-19 shots*. Saltwire. [https://www.saltwire.com/nova-scotia/news/provincial/high-](https://www.saltwire.com/nova-scotia/news/provincial/high-risk-but-no-jab-disabled-nova-scotians-question-why-they-cant-get-early-covid-19-shots-560668/)  
1079 [risk-but-no-jab-disabled-nova-scotians-question-why-they-cant-get-early-covid-19-shots-](https://www.saltwire.com/nova-scotia/news/provincial/high-risk-but-no-jab-disabled-nova-scotians-question-why-they-cant-get-early-covid-19-shots-560668/)  
1080 [560668/](https://www.saltwire.com/nova-scotia/news/provincial/high-risk-but-no-jab-disabled-nova-scotians-question-why-they-cant-get-early-covid-19-shots-560668/)
- 1081 55. Olanlesi-Aliu, A., Kemei, J., Alaazi, D., Tunde-Byass, M., Renzaho, A., Sekyi-Out, A., Mullings,  
1082 D. V., Osei-Tutu, K., & Salami, B. (2024). COVID-19 among Black people in Canada: a  
1083 scoping review. *Health Promotion and Chronic Disease Prevention in Canada*, 44(3), 112–  
1084 125. <https://doi.org/10.24095/HPCDP.44.3.05>
- 1085 56. *Race-based data must be collected to help fight COVID-19, advocates say | CBC News*. (n.d.).  
1086 Retrieved July 5, 2024, from [https://www.cbc.ca/news/canada/calgary/demographic-data-](https://www.cbc.ca/news/canada/calgary/demographic-data-collection-data-alberta-anti-racism-1.5680698)  
1087 [collection-data-alberta-anti-racism-1.5680698](https://www.cbc.ca/news/canada/calgary/demographic-data-collection-data-alberta-anti-racism-1.5680698)
- 1088 57. *COVID-19 disproportionately impacting BIPOC communities in Manitoba: report | CTV News*.  
1089 (n.d.). Retrieved July 5, 2024, from [https://winnipeg.ctvnews.ca/new-report-shows-the-](https://winnipeg.ctvnews.ca/new-report-shows-the-disproportionate-impact-of-covid-19-on-manitoba-s-bipoc-communities-1.5329076?cache=emuosurrypzum)  
1090 [disproportionate-impact-of-covid-19-on-manitoba-s-bipoc-communities-](https://winnipeg.ctvnews.ca/new-report-shows-the-disproportionate-impact-of-covid-19-on-manitoba-s-bipoc-communities-1.5329076?cache=emuosurrypzum)  
1091 [1.5329076?cache=emuosurrypzum](https://winnipeg.ctvnews.ca/new-report-shows-the-disproportionate-impact-of-covid-19-on-manitoba-s-bipoc-communities-1.5329076?cache=emuosurrypzum)
- 1092 58. *Black neighbourhoods in Toronto are hit hardest by COVID-19 — and it's 'anchored in*  
1093 *racism': experts | Globalnews.ca*. (n.d.). Retrieved July 4, 2024, from  
1094 <https://globalnews.ca/news/7015522/black-neighbourhoods-toronto-coronavirus-racism/>

- 1095 59. *Early signs suggest race matters when it comes to COVID-19. So why isn't Canada collecting*  
1096 *race-based data? | CBC News.* (n.d.). Retrieved July 4, 2024, from  
1097 <https://www.cbc.ca/news/canada/toronto/race-coronavirus-canada-1.5536168>
- 1098 60. *Nova Scotia enlists historically Black churches to help get COVID-19 vaccine to African Nova*  
1099 *Scotians - The Globe and Mail.* (n.d.). Retrieved July 4, 2024, from  
1100 [https://www.theglobeandmail.com/canada/article-nova-scotia-enlists-historically-black-](https://www.theglobeandmail.com/canada/article-nova-scotia-enlists-historically-black-churches-to-help-get-covid-19/)  
1101 [churches-to-help-get-covid-19/](https://www.theglobeandmail.com/canada/article-nova-scotia-enlists-historically-black-churches-to-help-get-covid-19/)
- 1102 61. Renić, K. (2021, February 3). *Coronavirus: Nova Scotia updates its COVID-19 vaccination*  
1103 *plan.* Global News. [https://globalnews.ca/news/7617434/nova-scotia-updates-covid-19-](https://globalnews.ca/news/7617434/nova-scotia-updates-covid-19-vaccination-plan/)  
1104 [vaccination-plan/](https://globalnews.ca/news/7617434/nova-scotia-updates-covid-19-vaccination-plan/)
- 1105 62. *Black Scientists' Task Force on Vaccine Equity – City of Toronto.* (n.d.). Retrieved July 4,  
1106 2024, from <https://www.toronto.ca/news/black-scientists-task-force-on-vaccine-equity/>
- 1107 63. *City of Toronto partners with Black, South Asian and Persons with Disabilities Organizations*  
1108 *to Support the Vaccine Campaign – City of Toronto.* (n.d.). Retrieved July 4, 2024, from  
1109 [https://www.toronto.ca/news/city-of-toronto-partners-with-black-south-asian-and-](https://www.toronto.ca/news/city-of-toronto-partners-with-black-south-asian-and-persons-with-disabilities-organizations-to-support-the-vaccine-campaign/)  
1110 [persons-with-disabilities-organizations-to-support-the-vaccine-campaign/](https://www.toronto.ca/news/city-of-toronto-partners-with-black-south-asian-and-persons-with-disabilities-organizations-to-support-the-vaccine-campaign/)
- 1111 64. Statistics Canada. (2019). *Diversity of the Black population in Canada: An overview.*  
1112 <https://www150.statcan.gc.ca/n1/pub/89-657-x/89-657-x2019002-eng.htm>
- 1113 65. Smylie, J., Firestone, M., & Spiller, M. W. (2018). Our health counts: population-based  
1114 measures of urban Inuit health determinants, health status, and health care access.  
1115 *Canadian Journal of Public Health = Revue Canadienne de Santé Publique*, 109(5–6), 662.  
1116 <https://doi.org/10.17269/S41997-018-0111-0>

- 1117 66. *Life expectancy of First Nations, Métis and Inuit household populations in Canada.* (n.d.).  
1118 Retrieved July 6, 2024, from <https://www150.statcan.gc.ca/n1/pub/82-003->  
1119 [x/2019012/article/00001-eng.htm](https://www150.statcan.gc.ca/n1/pub/82-003-x/2019012/article/00001-eng.htm)
- 1120 67. *Here's how community groups are getting COVID-19 vaccinations to Indigenous people in*  
1121 *Canada's largest city | CBC News.* (n.d.). Retrieved July 6, 2024, from  
1122 [https://www.cbc.ca/news/canada/toronto/covid-19-vaccination-outreach-indigenous-](https://www.cbc.ca/news/canada/toronto/covid-19-vaccination-outreach-indigenous-people-1.5949046)  
1123 [people-1.5949046](https://www.cbc.ca/news/canada/toronto/covid-19-vaccination-outreach-indigenous-people-1.5949046)
- 1124 68. Rotondi, M. A., O'Campo, P., O'Brien, K., Firestone, M., Wolfe, S. H., Bourgeois, C., & Smylie,  
1125 J. K. (2017). Our Health Counts Toronto: using respondent-driven sampling to unmask  
1126 census undercounts of an urban indigenous population in Toronto, Canada. *BMJ Open*,  
1127 7(12), e018936. <https://doi.org/10.1136/BMJOPEN-2017-018936>
- 1128 69. *N.S. aims to vaccinate 75 per cent of residents against COVID-19 by early fall | CBC News.*  
1129 (n.d.). Retrieved July 4, 2024, from [https://www.cbc.ca/news/canada/nova-scotia/ns-aims-](https://www.cbc.ca/news/canada/nova-scotia/ns-aims-to-vaccinate-75-per-cent-end-of-september-1.5861871)  
1130 [to-vaccinate-75-per-cent-end-of-september-1.5861871](https://www.cbc.ca/news/canada/nova-scotia/ns-aims-to-vaccinate-75-per-cent-end-of-september-1.5861871)
- 1131 70. Government of Ontario. (2021). *Ontario's COVID-19 vaccination plan | COVID-19*  
1132 *(coronavirus) in Ontario.* <https://covid-19.ontario.ca/ontarios-covid-19-vaccination-plan>
- 1133 71. Small, K. (2021, April 10). *Alberta's COVID-19 vaccine rollout expands to front-line health-*  
1134 *care workers on Monday.* Global News. [https://globalnews.ca/news/7750610/alberta-](https://globalnews.ca/news/7750610/alberta-covid-19-vaccine-rollout-2c/)  
1135 [covid-19-vaccine-rollout-2c/](https://globalnews.ca/news/7750610/alberta-covid-19-vaccine-rollout-2c/)
- 1136 72. Sterritt, A. (2021, March 3). *More than 24,000 Indigenous people in 113 B.C. communities*  
1137 *have received COVID-19 vaccine as Phase 2 begins.* CBC News.

- 1138 [https://www.cbc.ca/news/canada/british-columbia/24000-indigenous-people-receive-](https://www.cbc.ca/news/canada/british-columbia/24000-indigenous-people-receive-covid-19-vaccine-1.5933803)
- 1139 [covid-19-vaccine-1.5933803](https://www.cbc.ca/news/canada/british-columbia/24000-indigenous-people-receive-covid-19-vaccine-1.5933803)
- 1140 73. Inclusion Alberta. (2021, April 26). *UPDATE: High-Risk Albertans with Developmental*
- 1141 *Disabilities & Support Workers Should be Included in the Early Phases of Vaccine Schedule.*
- 1142 [https://inclusionalbertaina.org/connections/high-risk-albertans-with-developmental-](https://inclusionalbertaina.org/connections/high-risk-albertans-with-developmental-disabilities-support-workers-should-be-included-in-the-early-phases-of-vaccine-schedule/)
- 1143 [disabilities-support-workers-should-be-included-in-the-early-phases-of-vaccine-schedule/](https://inclusionalbertaina.org/connections/high-risk-albertans-with-developmental-disabilities-support-workers-should-be-included-in-the-early-phases-of-vaccine-schedule/)
- 1144 74. Government of Manitoba. (2021, March 16). *Department Of Families Circular: COVID-19*
- 1145 *2021-16.* Department Of Families Circular: COVID-19 2021-16.
- 1146 75. Government of Ontario. (2021). *Ontario's COVID-19 vaccination plan | COVID-19*
- 1147 *(coronavirus) in Ontario.* <https://www.ontario.ca/page/covid-19-coronavirus>
- 1148 76. *People deemed clinically extremely vulnerable prioritized for COVID-19 vaccine | BC Gov*
- 1149 *News.* (n.d.). Retrieved July 5, 2024, from [https://news.gov.bc.ca/releases/2021HLTH0022-](https://news.gov.bc.ca/releases/2021HLTH0022-000532)
- 1150 [000532](https://news.gov.bc.ca/releases/2021HLTH0022-000532)
- 1151 77. Campanella, S., Rotenberg, S., Volpe, T., Balogh, R., & Lunsky, Y. (2021, January 20).
- 1152 *Including People with Developmental Disabilities as a Priority Group in Canada's COVID-19*
- 1153 *Vaccination Program: Key Considerations: Part 1.* Health Care Access Research and
- 1154 Developmental Disabilities, CAMH. [https://www.camh.ca/-](https://www.camh.ca/-/media/files/professionals/hcardd/hcardd-including-dd-priority-group-canadas-covid19-vaccine-program-key-considerations-2021-part1-pdf.pdf)
- 1155 [/media/files/professionals/hcardd/hcardd-including-dd-priority-group-canadas-covid19-](https://www.camh.ca/-/media/files/professionals/hcardd/hcardd-including-dd-priority-group-canadas-covid19-vaccine-program-key-considerations-2021-part1-pdf.pdf)
- 1156 [vaccine-program-key-considerations-2021-part1-pdf.pdf](https://www.camh.ca/-/media/files/professionals/hcardd/hcardd-including-dd-priority-group-canadas-covid19-vaccine-program-key-considerations-2021-part1-pdf.pdf)
- 1157 78. Campanella, S., Rotenberg, S., Volpe, T., Balogh, R., & Lunsky, Y. (2021, March 29). *Including*
- 1158 *People with Developmental Disabilities as a Priority Group in Canada's COVID- 19*
- 1159 *Vaccination Program: Key Considerations: Part 2.* Health Care Access Research and

- 1160        Developmental Disabilities, CAMH. <https://www.camh.ca/->
- 1161        /media/files/professionals/hcardd/hcardd-including-dd-priority-group-canadas-covid19-
- 1162        vaccine-program-key-considerations-2021-part2-pdf.pdf
- 1163    79. Comité sur l'immunisation du Québec. (2021). *Avis Préliminaire Sur Les Groupes Prioritaires*
- 1164        *Pour La Vaccination Contre La COVID-19 Au Québec.*
- 1165        [https://www.inspq.qc.ca/sites/default/files/publications/3085-groupes-prioritaires-](https://www.inspq.qc.ca/sites/default/files/publications/3085-groupes-prioritaires-vaccination-covid19.pdf)
- 1166        vaccination-covid19.pdf
- 1167    80. Hounsell, K. (2021, March 7). *Prioritizing people with specific conditions for COVID vaccine*
- 1168        *slows race for herd immunity: N.S.'s top doctor.* CBC News.
- 1169        [https://www.cbc.ca/news/canada/nova-scotia/people-with-disabilities-covid-vaccine-](https://www.cbc.ca/news/canada/nova-scotia/people-with-disabilities-covid-vaccine-1.5939380)
- 1170        1.5939380
- 1171    81. Public Health Agency of Canada. (2021, February 12). *Guidance on the prioritization of key*
- 1172        *populations for COVID-19 immunization.* Government of Canada.
- 1173        [https://www.canada.ca/en/public-health/services/immunization/national-advisory-](https://www.canada.ca/en/public-health/services/immunization/national-advisory-committee-on-immunization-naci/guidance-prioritization-key-populations-covid-19-vaccination.html)
- 1174        committee-on-immunization-naci/guidance-prioritization-key-populations-covid-19-
- 1175        vaccination.html
- 1176    82. Freeze, C., & Hager, M. (2021, February 28). *Ontario gives Toronto OK to prioritize COVID-19*
- 1177        *vaccination of homeless people.* The Globe and Mail.
- 1178        [https://www.theglobeandmail.com/canada/article-ontario-gives-toronto-ok-to-prioritize-](https://www.theglobeandmail.com/canada/article-ontario-gives-toronto-ok-to-prioritize-covid-19-vaccination-of/)
- 1179        covid-19-vaccination-of/
- 1180    83. Brown, K. A., Stall, N. M., Joh, E., Allen, U., Bogoch, I. I., Buchan, S. A., Daneman, N., Evans,
- 1181        G. A., Fisman, D. N., Gibson, J. L., Hopkins, J., Van Ingen, T., Maltsev, A., Mcgeer, A.,

- 1182 Mishra, S., Razak, F., Sander, B., Schwartz, B., Schwartz, K., ... Jüni, P. (2021). *SCIENCE*
- 1183 *BRIEFS A Strategy for the Mass Distribution of COVID-19 Vaccines in Ontario Based on Age*
- 1184 *and Neighbourhood*. <https://doi.org/10.47326/ocsat.2021.02.10.1.0>
- 1185 84. Emanuel, E. J., Upshur, R., Thome, B., Parker, M., Glickman, A., Zhang, C., Boyle, C., Smith,
- 1186 M., & Phillips, J. P. (2020). Fair Allocation of Scarce Medical Resources in the Time of Covid-
- 1187 19. *N Engl j Med*, 382.
- 1188 85. Tasker, J. P. (2021, January 27). *Indigenous people should be priority for COVID-19 shots*
- 1189 *even amid shortage: minister*. CBC News. [https://www.cbc.ca/news/politics/indigenous-](https://www.cbc.ca/news/politics/indigenous-vaccinations-priority-marc-miller-1.5889826)
- 1190 [vaccinations-priority-marc-miller-1.5889826](https://www.cbc.ca/news/politics/indigenous-vaccinations-priority-marc-miller-1.5889826)
- 1191 86. Peters, D. (n.d.). *Vaccine advocacy to prioritize dentistry*. Faculty of Dentistry, University of
- 1192 Toronto. Retrieved October 4, 2023, from
- 1193 <https://www.dentistry.utoronto.ca/news/vaccine-advocacy-prioritize-dentistry>
- 1194 87. Ranaldi, C. (2021, February 13). *Advocates call on Quebec to prioritize those with*
- 1195 *developmental disabilities for COVID-19 vaccine*. CBC News.
- 1196 [https://www.cbc.ca/news/canada/montreal/covid-19-vaccine-priority-down-syndrome-](https://www.cbc.ca/news/canada/montreal/covid-19-vaccine-priority-down-syndrome-1.5913145)
- 1197 [1.5913145](https://www.cbc.ca/news/canada/montreal/covid-19-vaccine-priority-down-syndrome-1.5913145)
- 1198 88. Bero, T. (2021, May 11). *Vaccinating Black Toronto | The Local*. The Local.
- 1199 <https://thelocal.to/vaccinating-black-toronto/>
- 1200 89. Carey, C. (2021, May 9). *B.C.'s Blind community should receive COVID vaccine priority:*
- 1201 *advocate*. CityNews Vancouver. [https://vancouver.citynews.ca/2021/05/09/blindy-covid-](https://vancouver.citynews.ca/2021/05/09/blindy-covid-vaccine-priority/)
- 1202 [vaccine-priority/](https://vancouver.citynews.ca/2021/05/09/blindy-covid-vaccine-priority/)



- 1203 90. Rodriguez, J. (2021, February 21). *"It's devastating" disabled people not prioritized in*  
1204 *vaccine rollout, advocates say*. CTV News. [https://www.ctvnews.ca/health/coronavirus/it-](https://www.ctvnews.ca/health/coronavirus/its-devastating-disabled-people-not-prioritized-in-vaccine-rollout-advocates-say-1.5300728)  
1205 [s-devastating-disabled-people-not-prioritized-in-vaccine-rollout-advocates-say-1.5300728](https://www.ctvnews.ca/health/coronavirus/its-devastating-disabled-people-not-prioritized-in-vaccine-rollout-advocates-say-1.5300728)
- 1206 91. Crawley, M. (2021, April 10). *What's behind Ontario's abrupt shift toward vaccinating*  
1207 *everyone in COVID-19 hotspots*. CBC News.  
1208 [https://www.cbc.ca/news/canada/toronto/ontario-covid-19-vaccine-hotspots-postal-](https://www.cbc.ca/news/canada/toronto/ontario-covid-19-vaccine-hotspots-postal-code-1.5979774)  
1209 [code-1.5979774](https://www.cbc.ca/news/canada/toronto/ontario-covid-19-vaccine-hotspots-postal-code-1.5979774)
- 1210 92. Mishra, S., Stall, N. M., Ma, H., Odutayo, A., Kwong, J. C., Allen, U., Brown, K. A., Bogoch, I. I.,  
1211 Erman, A., Huynh, T., Ikura, S., Maltsev, A., McGeer, A., Moloney, G., Morris, A. M., Schull,  
1212 M., Siddiqi, A., Smylie, J., Watts, T., ... Juni, P. (2021). *A Vaccination Strategy for Ontario*  
1213 *COVID-19 Hotspots and Essential Workers*.  
1214 <https://doi.org/10.47326/OCSAT.2021.02.26.1.0>
- 1215 93. Green, M. E., Wong, S. T., Lavoie, J. G., Kwong, J., Macwilliam, L., Peterson, S., Liu, G., &  
1216 Katz, A. (2013). *Admission to hospital for pneumonia and influenza attributable to 2009*  
1217 *pandemic A/H1N1 Influenza in First Nations communities in three provinces of Canada*.  
1218 <https://doi.org/10.1186/1471-2458-13-1029>
- 1219 94. Boggild, A. K., Yuan, L., Low, D. E., & McGeer, A. J. (2011). The Impact of Influenza on the  
1220 Canadian First Nations. *Canadian Journal of Public Health = Revue Canadienne de Santé*  
1221 *Publique*, 102(5), 345. <https://doi.org/10.1007/BF03404174>
- 1222 95. Société québécoise de la déficience intellectuelle. (2021, February 24). *COVID-19 - Les*  
1223 *grandes oubliées de la vaccination : les personnes handicapées et celles vivant avec un*  
1224 *problème de santé mentale - Société québécoise de la déficience intellectuelle*.

- 1225 <https://www.sqdi.ca/fr/actualites/covid-19-les-grandes-oubliees-de-la-vaccination-les->
- 1226 [personnes-handicapees-et-celles-vivant-avec-un-probleme-de-sante-mentale/](https://www.sqdi.ca/fr/actualites/covid-19-les-grandes-oubliees-de-la-vaccination-les-)
- 1227 96. Gentile, D. (2021, March 10). *Prioriser la vaccination des autistes et des déficients*
- 1228 *intellectuels*. Radio-Canada; Radio-Canada.ca. <https://ici.radio->
- 1229 [canada.ca/nouvelle/1776154/covid-19-familles-reclament-priorite-vaccination-autistes-](https://ici.radio-canada.ca/nouvelle/1776154/covid-19-familles-reclament-priorite-vaccination-autistes-)
- 1230 [deficients-intellectuels](https://ici.radio-canada.ca/nouvelle/1776154/covid-19-familles-reclament-priorite-vaccination-autistes-)
- 1231 97. Boutros, M. (2021, April 17). *Québec sommé de permettre aux personnes handicapées de se*
- 1232 *faire vacciner contre la COVID-19 dès maintenant*. Le Devoir.
- 1233 <https://www.ledevoir.com/societe/sante/598965/quebec-somme-de-permettre-aux->
- 1234 [personnes-handicapees-de-se-faire-vacciner-des-maintenant?](https://www.ledevoir.com/societe/sante/598965/quebec-somme-de-permettre-aux-)
- 1235 98. Comité sur l'immunisation du Québec. (2021). *Avis préliminaire sur les groupes prioritaires*
- 1236 *pour la vaccination contre la COVID-19 au Québec*.
- 1237 <https://www.inspq.qc.ca/sites/default/files/publications/3085-groupes-prioritaires->
- 1238 [vaccination-covid19.pdf](https://www.inspq.qc.ca/sites/default/files/publications/3085-groupes-prioritaires-)
- 1239 99. MacLean, C. (2021, February 24). *Métis, Inuit in Manitoba want similar COVID-19 vaccine*
- 1240 *priority as First Nations* | CBC News.
- 1241 <https://www.cbc.ca/news/canada/manitoba/indigenous-manitobans-vaccine-priority->
- 1242 [1.5926939](https://www.cbc.ca/news/canada/manitoba/indigenous-manitobans-vaccine-priority-)
- 1243 100. Province of Manitoba. (2021, May 3). *All Indigenous Peoples in Manitoba 18 and Older*
- 1244 *Now Eligible for COVID-19 Vaccination*.
- 1245 <https://news.gov.mb.ca/news/index.html?item=51201>

- 1246 101. Minister of Justice. (1867, March 29). *THE CONSTITUTION ACTS, 1867 to 1982*.  
1247 <https://laws-lois.justice.gc.ca/eng/const/index.html>
- 1248 102. *Aboriginal Peoples in Canada: First Nations People, Métis and Inuit*. (n.d.). Retrieved July 6,  
1249 2024, from [https://www12.statcan.gc.ca/nhs-enm/2011/as-sa/99-011-x/99-011-](https://www12.statcan.gc.ca/nhs-enm/2011/as-sa/99-011-x/99-011-x2011001-eng.cfm)  
1250 [x2011001-eng.cfm](https://www12.statcan.gc.ca/nhs-enm/2011/as-sa/99-011-x/99-011-x2011001-eng.cfm)
- 1251 103. Black Health Alliance. (n.d.). *COVID-19*. Black Health Alliance. Retrieved October 1, 2023,  
1252 from <https://blackhealthalliance.ca/covid-19-3/>
- 1253 104. Statistics Canada. (2017). Focus on Geography Series, 2016 Census - Province of British  
1254 Columbia. In *Data products, 2016 Census*. [https://www12.statcan.gc.ca/census-](https://www12.statcan.gc.ca/census-recensement/2016/as-sa/fogs-spg/Facts-PR-Eng.cfm?TOPIC=9&LANG=Eng&GK=PR&GC=59)  
1255 [recensement/2016/as-sa/fogs-spg/Facts-PR-Eng.cfm?TOPIC=9&LANG=Eng&GK=PR&GC=59](https://www12.statcan.gc.ca/census-recensement/2016/as-sa/fogs-spg/Facts-PR-Eng.cfm?TOPIC=9&LANG=Eng&GK=PR&GC=59)
- 1256 105. Chastko, K., Charbonneau, P., & Martel, L. (2022). Population growth in Canada's rural  
1257 areas, 2016 to 2021. In *Statistics Canada's Centre for Demography*.  
1258 [https://www12.statcan.gc.ca/census-recensement/2021/as-sa/98-200-x/2021002/98-200-](https://www12.statcan.gc.ca/census-recensement/2021/as-sa/98-200-x/2021002/98-200-x2021002-eng.cfm)  
1259 [x2021002-eng.cfm](https://www12.statcan.gc.ca/census-recensement/2021/as-sa/98-200-x/2021002/98-200-x2021002-eng.cfm)
- 1260 106. Nickel, R., Lewis, J., & Lampert, A. (2020, December 8). *Canada's vast, remote geography*  
1261 *leaves rural towns vulnerable in coronavirus fight*. Global News.  
1262 <https://globalnews.ca/news/7508060/canada-geography-rural-town-coronavirus/>
- 1263 107. Aggarwal, M., Kokorelias, K. M., Glazier, R. H., Katz, A., Shiers-Hanley, J. E., & Upshur, R. E.  
1264 G. (2023). What is the role of primary care in the COVID-19 vaccine roll-out and the  
1265 barriers and facilitators to an equitable vaccine roll-out? A rapid scoping review of nine  
1266 jurisdictions. *BMJ Open*, 13(4). <https://doi.org/10.1136/BMJOPEN-2022-065306>

108. Gabrielle Giroday. (2019, November 15). *Lack of health data hurting Black Canadian women, U of T researchers find*. University of Toronto.  
<https://www.utoronto.ca/news/lack-health-data-hurting-black-canadian-women-u-t-researchers-find>
109. Gmitroski, K.-L., Hastings, K. G., Legault, G., & Barbic, S. (2023). Métis health in Canada: a scoping review of Métis-specific health literature. *Canadian Medical Association Open Access Journal*, 11(5), E884–E893. <https://doi.org/10.9778/CMAJO.20230006>
110. Mckenzie, K. (2021). Socio-demographic data collection and equity in covid-19 in Toronto. *EClinicalMedicine*, 34, 100812. <https://doi.org/10.1016/j.eclinm.2021.100812>
111. Nnorom, O., Findlay, N., Lee-Foon, N. K., Jain, A. A., Ziegler, C. P., Scott, F. E., Rodney, P., & Lofters, A. K. (2019). Dying to Learn: A Scoping Review of Breast and Cervical Cancer Studies Focusing on Black Canadian Women. *Journal of Health Care for the Poor and Underserved*, 30(4), 1331–1359. <https://doi.org/10.1353/HPU.2019.0100>
112. Datta, G., Siddiqi, A., & Lofters, A. (2021). Transforming race-based health research in Canada. *CMAJ*, 193(3), E99–E100. <https://doi.org/10.1503/CMAJ.201742>
113. Alliance for Healthier Communities. (2020, April 10). *Letter to Premier Ford, Deputy Premier Elliott and Dr. Williams regarding the need to collect and use socio-demographic and race-based data*. <https://www.allianceon.org/news/Letter-Premier-Ford-Deputy-Premier-Elliott-and-Dr-Williams-regarding-need-collect-and-use-socio>
114. Public Health Agency of Canada. (2021, February 21). *CPHO Sunday Edition: The Impact of COVID-19 on Racialized Communities - Canada.ca*. Government of Canada.

- 1288 <https://www.canada.ca/en/public-health/news/2021/02/cpho-sunday-edition-the-impact->
- 1289 [of-covid-19-on-racialized-communities.html](https://www.canada.ca/en/public-health/news/2021/02/cpho-sunday-edition-the-impact-of-covid-19-on-racialized-communities.html)
- 1290 115. Chief Public Health Officer of Canada. (2020). *From risk to resilience: An equity approach to*
- 1291 *COVID-19* . [https://www.canada.ca/en/public-health/corporate/publications/chief-public-](https://www.canada.ca/en/public-health/corporate/publications/chief-public-health-officer-reports-state-public-health-canada/from-risk-resilience-equity-approach-covid-19.html)
- 1292 [health-officer-reports-state-public-health-canada/from-risk-resilience-equity-approach-](https://www.canada.ca/en/public-health/corporate/publications/chief-public-health-officer-reports-state-public-health-canada/from-risk-resilience-equity-approach-covid-19.html)
- 1293 [covid-19.html](https://www.canada.ca/en/public-health/corporate/publications/chief-public-health-officer-reports-state-public-health-canada/from-risk-resilience-equity-approach-covid-19.html)
- 1294 116. Anderson, T. (2021). *Portrait of youth in Canada: Data report — Chapter 4: Indigenous*
- 1295 *Youth in Canada*. [https://www150.statcan.gc.ca/n1/pub/42-28-](https://www150.statcan.gc.ca/n1/pub/42-28-0001/2021001/article/00004-eng.htm)
- 1296 [0001/2021001/article/00004-eng.htm](https://www150.statcan.gc.ca/n1/pub/42-28-0001/2021001/article/00004-eng.htm)
- 1297 117. Block, S., & Galabuzi, G.-E. (2011). *Canada's Colour Coded Labour Market: The gap for*
- 1298 *racialized workers*.
- 1299 [https://homelesshub.ca/sites/default/files/Colour\\_Coded\\_Labour\\_MarketFINAL.pdf](https://homelesshub.ca/sites/default/files/Colour_Coded_Labour_MarketFINAL.pdf)
- 1300 118. Wrigley-Field, E., Kiang, M. V, Riley, A. R., Barbieri, M., Chen, Y.-H., Duchowny, K. A.,
- 1301 Matthey, E. C., Van Riper, D., Jegathesan, K., Bibbins-Domingo, K., & Leider, J. P. (2021).
- 1302 Geographically targeted COVID-19 vaccination is more equitable and averts more deaths
- 1303 than age-based thresholds alone COVID-19 mortality increases markedly with age and is
- 1304 also substantially higher among Black, Indigenous, and People of Color (BIPOC) populations
- 1305 in the. *Sci. Adv*, 7.
- 1306 119. Ghazal, I., Rachadi, A., & Ez-Zahraouy, H. (2022). Optimal allocation strategies for
- 1307 prioritized geographical vaccination for Covid-19. *Physica A: Statistical Mechanics and Its*
- 1308 *Applications*, 607, 128166. <https://doi.org/10.1016/J.PHYSA.2022.128166>

## Supporting information

**S1 Appendix.** COnsolidated criteria for REporting Qualitative research (COREQ): 32-item checklist.

**S2 Appendix.** Environmental scan data collection tool.

**S3 Appendix.** Key informant interview guide.

|  |                   |
|--|-------------------|
|  | Not prioritized   |
|  | Phase 1           |
|  | Phase 2           |
|  | Phase 3           |
|  | No defined phases |

|                   |                  | January 2021                                                                                     | February 2021 | March 2021 | April 2021 | May 2021 |
|-------------------|------------------|--------------------------------------------------------------------------------------------------|---------------|------------|------------|----------|
| Black communities | Alberta          |                                                                                                  |               |            |            |          |
|                   | British Columbia |                                                                                                  |               |            |            |          |
|                   | Manitoba         |                                                                                                  |               |            |            |          |
|                   | Nova Scotia      | All African Nova Scotian communities (planning began in Feb; first vaccines administered in Apr) |               |            |            |          |
|                   | Ontario          | Ages 12+ in "hot spot" communities                                                               |               |            |            |          |
|                   | Quebec           |                                                                                                  |               |            |            |          |

|                               |                  | January 2021                             | February 2021                                                                                                                                            | March 2021                     | April 2021        | May 2021                 |
|-------------------------------|------------------|------------------------------------------|----------------------------------------------------------------------------------------------------------------------------------------------------------|--------------------------------|-------------------|--------------------------|
| First Nations, Inuit, & Métis | Alberta          | Remote and fly-in FN communities         | FN or Métis aged 65+                                                                                                                                     | FNIM aged 50+ (on/off reserve) | All FNIM aged 35+ |                          |
|                               | British Columbia | Remote & isolated Indigenous communities | FNIM aged 65+; Elders & other community leaders                                                                                                          | FNIM aged 18-64                |                   |                          |
|                               | Manitoba         |                                          | First dose by age group: FN in remote communities and in urban centres (incl. Elders, Traditional Healers, & Knowledge Keepers)                          |                                |                   | All FNIM for second dose |
|                               | Nova Scotia      |                                          | Mi'kmaq and FN communities aged 55+, starting with Elders, Knowledge, and Language Keepers, followed by other Indigenous communities on- and off-reserve |                                |                   |                          |
|                               | Quebec           |                                          | Rank 4: Adults aged 18+ of remote or isolated communities (added in revised plan released in March)                                                      |                                |                   |                          |
|                               |                  |                                          |                                                                                                                                                          |                                |                   |                          |

|                               |                  | January 2021 | February 2021                                                                                        | March 2021                  | April 2021                                                             | May 2021                         |    |     |
|-------------------------------|------------------|--------------|------------------------------------------------------------------------------------------------------|-----------------------------|------------------------------------------------------------------------|----------------------------------|----|-----|
| Non-medical essential workers | Alberta          |              |                                                                                                      |                             | Workplaces at high risk of outbreaks                                   |                                  |    |     |
|                               | British Columbia |              |                                                                                                      | Priority front-line workers | Priority front-line workers continued                                  |                                  |    |     |
|                               | Manitoba         |              |                                                                                                      |                             |                                                                        | All critical workers             |    |     |
|                               | Nova Scotia      |              | Workers in high-risk congregate settings who cannot work from home (e.g. cannot physically distance) |                             |                                                                        | Those who travel out of province |    |     |
|                               | Ontario          |              |                                                                                                      |                             |                                                                        | *                                | ** | *** |
|                               | Quebec           |              |                                                                                                      |                             | Rank 9: adults <60 yrs in essential services who cannot work virtually |                                  |    |     |

|                                       |                  | January 2021 | February 2021 | March 2021                                | April 2021                                                                       | May 2021                                              |
|---------------------------------------|------------------|--------------|---------------|-------------------------------------------|----------------------------------------------------------------------------------|-------------------------------------------------------|
| Individuals experiencing homelessness | Alberta          |              |               |                                           |                                                                                  | Transient populations                                 |
|                                       | British Columbia |              |               |                                           | Vulnerable populations living in select congregate settings                      |                                                       |
|                                       | Manitoba         |              |               | Residents of congregate living facilities | Urban Indigenous unhoused population                                             |                                                       |
|                                       | Nova Scotia      |              |               |                                           | Residents living in homeless shelters                                            |                                                       |
|                                       | Ontario          |              |               |                                           |                                                                                  | Shelter residents + individuals living in encampments |
|                                       | Quebec           |              |               |                                           | Rank 4: Residents of homeless shelters (added in revised plan released in March) |                                                       |

|                               |                  | January 2021 | February 2021                           | March 2021                                                                                                                    | April 2021                                                                                   | May 2021                                     |
|-------------------------------|------------------|--------------|-----------------------------------------|-------------------------------------------------------------------------------------------------------------------------------|----------------------------------------------------------------------------------------------|----------------------------------------------|
| Individuals with disabilities | Alberta          |              |                                         |                                                                                                                               | Those aged 12-64 with profound learning disabilities or severe developmental delays          |                                              |
|                               | British Columbia |              | Severely disabled and institutionalized |                                                                                                                               | Clinically vulnerable with dev. disabilities; significant high-risk disabilities (16-74 yrs) |                                              |
|                               | Manitoba         |              |                                         | High-risk individuals aged 55-64 with severe dev. disabilities; adults of CLdS living in congregate care settings (mid-March) |                                                                                              |                                              |
|                               | Nova Scotia      |              |                                         |                                                                                                                               |                                                                                              |                                              |
|                               | Ontario          |              |                                         |                                                                                                                               |                                                                                              | High-risk with dev./ intellect. disabilities |
|                               | Quebec           |              |                                         | Rank 8: Those < 60 yrs and institutionalized; homebound residents (incl. in March revised plan)                               |                                                                                              |                                              |

Figure 1
