1 An equity-focused comparison of the COVID-19 vaccine rollout plans across six Canadian provinces

2

3 **Investigators:**

4 \*Mercedes Sobers<sup>1,2</sup>, \*Vajini Atukorale<sup>1</sup>, Dane Mauer-Vakil<sup>3,4</sup>, Kainat Bashir<sup>3</sup>, Mariame

5 Ouedraogo<sup>1</sup>, Christoffer Dharma<sup>1</sup>, +Anushka Atallahjan<sup>1,5</sup>, +Shaza A. Fadel<sup>1</sup>, +Sara Allin<sup>1,3</sup>

6

7 **Affiliations:**

8 1. Dalla Lana School of Public Health, University of Toronto, Toronto, Ontario, Canada

9 2. Office of Health Equity, Centre for Addiction and Mental Health, Toronto, Ontario, Canada

10 3. Institute of Health Policy, Management & Evaluation, University of Toronto, Toronto,  
11 Ontario, Canada

12 4. School of Public Health Sciences, University of Waterloo, Waterloo, Ontario, Canada

13 5. School of Health Studies, Faculty of Health Sciences Western University, London, Canada

14

15 \*Co-first authorship. These authors contributed equally to this work.

16 +These authors contributed equally as supervisors to the lead authors and as co-senior  
17 responsible authors.

18

19 **Corresponding author:** Mercedes Sobers, [mercedes.sobers@utoronto.ca](mailto:mercedes.sobers@utoronto.ca)

20

21 **Declarations:** We declare no conflict of interest.

22    **Funding statement:** This research was made possible through the financial support and  
23    mentorship provided by the DLSPH Implementation Science Trainee Cluster Program at the  
24    University of Toronto Dalla Lana School of Public Health.

## 26 Abstract

27 **Objectives:** This study examined how six Canadian provinces (Alberta, British Columbia,  
28 Manitoba, Nova Scotia, Ontario, Quebec) adapted guidelines from the National Advisory  
29 Committee on Immunization to prioritize COVID-19 vaccines equitably for five key populations  
30 at high risk: Black communities; First Nations, Inuit, and Métis populations; non-medical  
31 essential workers; individuals experiencing homelessness; and individuals with disabilities. The  
32 objective was to compare timelines, justifications, and contextual factors that influenced  
33 provincial prioritization for early vaccine access.

34  
35 **Methods:** A mixed-methods approach was used to investigate how provinces operationalized  
36 equity in their vaccine rollout plans. Environmental scans (December 2020 – May 2021)  
37 gathered data on prioritization and distribution from provincial reports and media articles. Key  
38 informant interviews (December 2021 – April 2022) with provincial experts provided context on  
39 decision-making and justifications for prioritizing key populations. Data analysis employed the  
40 “Reach” component of the RE-AIM framework, with qualitative analysis of interviews following  
41 an interpretive descriptive approach.

42  
43 **Results:** Provinces used age-, risk-, and health status-based approaches to select priority  
44 populations. While all provinces consulted the National Advisory Committee on Immunization  
45 guidelines and various ethical frameworks to guide their decisions, deviations occurred due to  
46 local contexts. First Nations, Inuit, and Métis populations were prioritized earliest in all  
47 provinces, while Black communities received the least prioritization. Key subgroups, such as

48 urban First Nations, Inuit, and Métis, unsheltered homeless individuals, and homebound  
49 disabled persons, were often overlooked. Factors that emerged as key drivers of priority  
50 population selection were data availability, population size, and geography.

51

52 **Conclusions:** This study fills gaps in the literature by highlighting key contextual factors unique  
53 to each province that drove provincial justifications for their prioritization decisions. We  
54 provide several examples of the importance of data availability and early community-led  
55 partnerships when designing a successful mass vaccination rollout.

## 56 Introduction

57 The COVID-19 pandemic took a significant health and economic toll globally with its high  
58 infectivity and mutation rate. Its morbidity and mortality burdens were on a scale unobserved  
59 since the 1918 Spanish influenza<sup>1</sup>. Although regulators around the world authorised COVID-19  
60 vaccines for emergency use in record time for their respective countries, nations still had to  
61 acquire sufficient vaccine doses and then plan how to efficiently and equitably distribute the  
62 vaccine to all communities in order of risk<sup>2</sup>. All countries, regardless of income status, were  
63 forced to grapple with the limitations of their existing public health infrastructure and the state  
64 of their partnerships with communities in need.

65  
66 In Canada, the collective federal, provincial, and territorial pandemic response goal was to  
67 “minimize serious illness and overall deaths while minimizing societal disruption” caused by  
68 COVID-19<sup>3</sup>. Although Health Canada approved the first COVID-19 vaccines for emergency  
69 distribution in December 2020, there was a global shortage of vaccines early in the rollout<sup>4</sup>. By  
70 the end of January 2021, the Canadian government secured about 1 million vaccine doses for a  
71 population of about 38 million, with shortages persisting until early April 2021<sup>4-6</sup>. Furthermore,  
72 the first two approved mRNA-based vaccines, manufactured by Moderna and Pfizer-BioNTech,  
73 had stringent cold storage requirements of -20°C and -80°C, respectively<sup>7-9</sup>. Vaccine supply  
74 chains in Canada were not adequately prepared to transport these vaccines efficiently to  
75 remote areas where the need was often the most critical<sup>10-12</sup>. Moreover, most approved  
76 vaccines required a minimum of two doses to be considered protected, necessitating additional  
77 planning around when to prioritize populations for their primary dose series, and how to follow

78 up with transient populations to ensure full coverage<sup>2</sup>. Given these on-the-ground realities,  
79 Canadian jurisdictions had to make difficult decisions regarding which populations to prioritize  
80 for vaccine distribution until more doses could be acquired.

81  
82 Amidst such a challenging scenario characterized by high demand and limited vaccine supply,  
83 concerns regarding the fair distribution of vaccines inevitably surfaced within Canada and  
84 worldwide<sup>13–16</sup>. Drawing from lessons learned from past pandemics such as H1N1<sup>17</sup> Canada  
85 recognized the need for early, equitable access to COVID-19 vaccines within its own borders<sup>18</sup>.  
86 This was further energized by a societal and global consensus, led by international technical  
87 advisory groups on immunization (e.g. the United Kingdom’s Joint Committee on Vaccination  
88 and Immunization and France’s Haute Autorité de Santé), that equitable distribution was not  
89 only ethically imperative but also pivotal for limiting the spread of the COVID-19 virus<sup>19,20</sup>.

90  
91 Canada’s national immunization technical advisory group, the National Advisory Committee on  
92 Immunization (NACI), was tasked with developing federal guidelines to ensure equitable COVID-  
93 19 vaccine distribution<sup>21</sup>. Provinces and territories were then responsible for implementing and  
94 adapting these recommendations to their local contexts<sup>22</sup>. Using the Ethics, Equity, Feasibility,  
95 and Acceptability (EEFA) framework, NACI defined equity as the “absence of avoidable, unfair,  
96 or remediable differences among groups, whether those groups are defined socially,  
97 economically, demographically, or geographically or by other means of stratification”<sup>21</sup>. These  
98 guidelines suggest that equity considerations, in addition to the standard age-based rollout,  
99 were essential to mitigating the negative impacts of the pandemic. Therefore, NACI

100 recommended phased prioritization of key populations who were grouped into four major  
101 categories: (1) those at high risk of severe illness and death from COVID-19 due to poorer  
102 health; (2) those at high risk of exposure and transmission due to the nature of their occupation  
103 or workplace; (3) those who maintain essential services; and (4) those who work or live in  
104 conditions that put them at high risk of infection with disproportionate consequences<sup>21,23</sup>. NACI  
105 recommended priority populations and dosing intervals by summarizing the best available  
106 evidence of existing risk data at the time, updating its guidelines throughout the vaccine rollout  
107 as more evidence became available<sup>24,25</sup>.

108  
109 Our research group selected five key populations that were highlighted by NACI in the early  
110 stages of the rollout (late 2020 / early 2021) as experiencing a significantly higher risk of  
111 negative outcomes or barriers to vaccination than the general population<sup>25-27</sup>. These  
112 populations were Black communities; First Nations, Inuit, and Métis populations; non-medical  
113 essential workers; individuals experiencing homelessness; and individuals with disabilities<sup>25-27</sup>.  
114 We applied an equity lens to examine the variability in when and how Canadian jurisdictions  
115 chose to prioritize these populations across provinces. We also investigated how provinces  
116 considered contextual factors such as population size and distribution; current COVID-19  
117 prevalence rates among specific populations<sup>28,29</sup>; and geographic and occupational risk  
118 exposures<sup>29</sup> that can significantly influence vaccine uptake.

119  
120 This paper uses an implementation science approach to examine how six Canadian provinces  
121 considered and adapted NACI guidance regarding the equitable prioritization of COVID-19

122 vaccines for the above study populations during the primary dose series phase of the rollout  
123 (December 2021 to April 2022). Specifically, we:

124

125 1. Compared justification and timelines for prioritization used by the provinces for  
126 prioritization of the key populations.

127

128 2. Identified contextual factors that influenced how provinces selected priority populations  
129 for early COVID-19 vaccine access.

130

131 This paper is one of three publications conducted by our research team as part of a larger  
132 research project<sup>30,31</sup>.

## 133 **Materials and Methods**

134 Comprehensive environmental scans and key informant interviews informed our understanding  
135 of each province's vaccine rollout plan, including any ethical frameworks used, the order of  
136 prioritization (timelines), and justifications provided for and the context around provincial  
137 decisions regarding prioritization of our five study populations. To ensure transparent and  
138 comprehensive reporting, we adhered to the COnsolidated criteria for REporting Qualitative  
139 research (COREQ) checklist, guiding the documentation of our study Methods and Results<sup>32</sup>. For  
140 a detailed reference, please consult S1 Appendix for the COREQ checklist. Approval for the  
141 research was obtained from the University of Toronto (UofT) ethics committee (REB protocol  
142 #28098).



## 143 Researcher Characteristics

144 The research team, consisting of graduate students and research mentors from the UofT, was  
145 established through the Dalla Lana School of Public Health (DLSPH) Implementation Science  
146 Trainee Cluster Program at the UofT. The student researchers consisted of six doctoral students  
147 (four females: KB, MO, MS, VA; two males: CD, DMV) specializing in epidemiology, health  
148 services research, or public health sciences. They were guided by three female mentors (AA, SA,  
149 SF) with experience in implementation science, population health and immunity, health  
150 systems and policies, health system performance, and health equity. Representing diverse  
151 ethnicities and lived experiences, this multidisciplinary team brought a wealth of expertise to  
152 the study, including in implementation science, health equity research, infectious disease  
153 outbreak investigations, and vaccine science and policy. All team members had prior experience  
154 in qualitative research, including conducting structured or semi-structured interviews and  
155 interview-based questionnaires with various stakeholders such as key informants, community  
156 leaders/members, or patients. Additionally, several team members specialized in community-  
157 based, participatory action research, particularly among marginalized or vulnerable  
158 populations.

## 159 Study Population and Context

160 We analysed prioritization plans for five key populations: Black communities, First Nations,  
161 Inuit, and Métis populations (FNIM), non-medical essential workers, individuals experiencing  
162 homelessness, and individuals with disabilities across six Canadian provinces (Alberta, British  
163 Columbia, Nova Scotia, Manitoba, Ontario, and Quebec). Our five population groups were  
164 selected because they were prioritized by NACI as being at substantial risk of transmission and

165 outbreaks, severe illness, and/or barriers to vaccine uptake<sup>21</sup>. We narrowed our study to the  
166 above six provinces after a preliminary environmental scan our team conducted of all Canadian  
167 jurisdictions. We concluded that these provinces had the most publicly available data on  
168 published prioritization plans and implementation timelines. Additionally, they provided a  
169 representative snapshot of the diversity of Canadian jurisdictions, in terms of population size  
170 and constitution, resources, and geography.

171  
172 We also investigated how subgroups within our five populations of interest were prioritized, as  
173 our pilot scans indicated that there were differences in the extent to which these groups were  
174 prioritized across provinces. First, we defined Black communities as including people of African  
175 or Caribbean ancestry who live in Canada. Second, we examined prioritization for on- and off-  
176 reserve, urban, and remote FNIM populations. For essential workers, we narrowed our focus to  
177 only examining workers in non-healthcare settings because our preliminary scans indicated that  
178 essential workers in health-related settings (e.g. healthcare workers, staff in congregate  
179 settings, etc.) were prioritized first across all provinces. Additionally, we were interested in how  
180 provinces defined essential workers in their rollout plans as part of our analysis. This provided  
181 further context for how and why prioritization decisions were made for this diverse group. For  
182 individuals experiencing homelessness, we considered both those who lived in shelters (or  
183 individuals in second-stage housing) as well as those with precarious living conditions (e.g. not  
184 living in shelters, living on the streets, experiencing unstable housing, etc.). Finally, among  
185 individuals with disabilities, we focused on individuals facing significant barriers to vaccination  
186 due to either developmental (e.g., severe developmental delays, individuals in institutionalized

187 care) or physical challenges (e.g., homebound individuals). Overall, we wanted to keep in mind  
188 our key study objective of studying populations at high risk of negative outcomes and/or  
189 barriers to vaccine access.

190

## 191 Data Collection

192 We used a two-step, mixed-methods approach to assess provincial efforts to reach priority  
193 populations. We first conducted environmental scans of the six provinces between December  
194 1st, 2020, and May 31st, 2021, followed by key informant (KI) interviews between December  
195 1st, 2021, and April 30th, 2022. The study period began when emergency vaccines were  
196 approved in Canada (Dec 2020) and ended just before all provinces reached their general  
197 population vaccination phase (around June 2021), as it was assumed that all high-risk  
198 populations requiring early prioritization would have been reached by that point. This period  
199 was selected to capture initial provincial decisions that were made about which populations to  
200 prioritize and strategies that were implemented for the primary dose series (first and second  
201 doses), in response to significant vaccine shortages and delays at the beginning of the rollout.

202

## 203 Environmental Scans

204 For environmental scans, we reviewed provincial reports, statements, and scientific or media  
205 articles, released between December 2020 and May 2021, related to vaccine prioritization plans  
206 for our five key populations. We intentionally focused on provincial government-led efforts to  
207 reach priority populations, excluding community or grassroots initiatives that addressed gaps in  
208 provincial-led outreach, such as those facilitated by organizations like the Health Association of

209 African Canadians in Nova Scotia<sup>33,34</sup>, unless provinces intentionally collaborated with these  
210 community groups as part of their pre-determined strategy to prioritize and engage with  
211 communities (e.g. Black churches in Nova Scotia<sup>35</sup>). For the Environmental Scan Data Collection  
212 Tool used, please consult S2 Appendix.

213  
214 The extracted data was used to generate a single summary for each province detailing their  
215 COVID-19 vaccine prioritization plans for our priority populations. For each key population, the  
216 summaries detailed the extent to which they were prioritized (if it all), along with the timeline  
217 and methodologies employed for vaccine implementation. Additionally, the summaries  
218 included justifications listed on provincial websites that would indicate how decision-makers  
219 rationalized their choices.

220  
221 Environmental scans were conducted in two stages. Preliminary scans were conducted before  
222 KI interviews, and the initial findings were shared with KIs for validation, correction, and  
223 additional information. After incorporating feedback from the KIs (see below), a final  
224 environmental scan summary was compiled, incorporating any new data released since the  
225 initial scan and contextual information or corrections provided by KIs.

226  
227 [Key Informant Interviews](#)

228 To contextualize and validate our environmental scan findings, we conducted KI interviews with  
229 public health experts involved in the vaccine rollout across provinces between December 2021  
230 and April 2022. The research team invited a total of 89 KIs from the six study provinces. KI

231 interviews were carried out until reaching saturation, comprising 31 interviews with 41  
232 participants. Generally, interviews were conducted with individual KIs, unless they specifically  
233 requested a group interview. Of the 31 interviews conducted, 25 were individual sessions and  
234 six took place in groups of 2 to 4 individuals. To ensure comprehensive representation for each  
235 province, we conducted a minimum of 4 interviews per province. Two KIs later decided to  
236 withdraw their interviews from the study over concerns of being identified.

237  
238 KIs chosen for our study held diverse roles in public health, including medical officers of health,  
239 vaccine task force leads, physicians, members of pandemic response teams, medical  
240 anthropologists, public health experts, and representatives from NACI. Of the 31 interviews, 27  
241 (87%) represented academic, government, or research institutions, while 13% were affiliated  
242 with community organizations. Notably, approximately 90% of participants had prior  
243 experience with communicable disease control and vaccine delivery programs before the  
244 COVID-19 pandemic.

245  
246 KIs were selected through a comprehensive review of publicly available information on key  
247 decision makers and stakeholders involved in COVID-19 vaccine rollout committees, working  
248 groups, advisory panels, task forces, as well as through the social networks of the team. Two  
249 members of the research team (MO and CD) sent invitation emails to selected individuals in  
250 stages, with up to two follow-up emails when necessary. A group of informants received the  
251 initial invitation; if there were no responses, additional potential informants from the  
252 respective province were contacted. Interested informants received an information sheet

253 detailing the study's objectives along with a consent form. Participation incentives were not  
254 provided. Those who accepted the invitation were scheduled for an online interview using  
255 Zoom.

256  
257 Prior to the interviews, participants were asked to review our environmental scan summary of  
258 the COVID-19 vaccine rollout plan for their respective province. During the interview, KIs were  
259 asked to verify the accuracy of the findings from the environmental scan. They were also given  
260 the opportunity to offer any corrections or supplementary information during the interview or  
261 afterward via email. At the end of each interview, KIs were asked to recommend any potential  
262 informants that they believed could contribute to the issues discussed in the study. Those  
263 referred were then contacted by either the study team or directly by the referring KI, similar to  
264 a snowball sampling method of recruiting participants<sup>36</sup>.

265  
266 Interviews were semi-structured, following an interview guide but allowing interviewers to ask  
267 probing questions for more information if needed (Refer to S3 Appendix for the Interview  
268 Guide). The interview guide was pilot tested by research team members. Interviews were  
269 scheduled for 1.5 hours each and generally took the full time. KI interviews were primarily  
270 conducted by two members of the research team (MS and VA) with support from two team  
271 members (KB and CD) on two separate occasions due to scheduling conflicts. Researchers  
272 conducted interviews from private rooms with KIs to ensure confidentiality. All interviews were  
273 conducted over Zoom and were audio recorded after expressly seeking participant consent.  
274 Preliminary transcription was completed by the Zoom platform. Transcripts were further

275 reviewed by all student research members. Within two weeks of each interview, KIs received  
276 the cleaned transcript for review and were given the opportunity to respond via email with any  
277 concerns they had regarding the accuracy of captured information.

278

## 279 Data Analysis

280 Our analysis was guided by the “Reach” component of the RE-AIM implementation science  
281 framework<sup>37</sup>. Using this framework, we were able to implement a content analysis approach of  
282 extracting data on the prioritization of populations and the strategies employed to promote  
283 COVID-19 vaccine uptake. The “Reach” component of RE-AIM framework assesses the extent  
284 to which an intervention or program effectively reaches its intended target population and  
285 achieves broad reach among the individuals or groups it aims to impact<sup>38</sup>. Although the RE-AIM  
286 framework has four other components (effectiveness, adoption, implementation, and  
287 maintenance), we determined that “Reach” was the only component that would sufficiently  
288 address our project goals during our study time period, which was very early on in the rollout.  
289 We conceptualized our study around September 2020, prior to the first COVID-19 vaccines  
290 being licensed (December 2020). NACI guidelines on reaching priority populations and  
291 provincial vaccine rollout plans were just starting to get published. We concluded that it would  
292 be premature to utilize the full RE-AIM framework since it would likely take several months, if  
293 not a few years, to determine the effectiveness of these policy plans, how well they were  
294 adopted and implemented, and whether they were successful enough to incorporate into  
295 regular policy practices over time.

296

297 Guided by “Reach”, we focused on the first two of four indicator questions (Table 1) to  
298 determine the following for each province: (a) if and when each of the five key populations was  
299 prioritized and (b) how provinces justified their prioritization decisions to the general public.  
300 Obtaining answers to these study objectives drove how we structured our environmental scans  
301 as well as the themes analysed from the KI interviews.

302

303 **Table 1. Data analysis guiding questions.**

|   |                                                                                                                                                                                               |
|---|-----------------------------------------------------------------------------------------------------------------------------------------------------------------------------------------------|
| 1 | Was this population prioritized? If so, when?                                                                                                                                                 |
| 2 | Were there clear communication and justification for the choice of this population?                                                                                                           |
| 3 | What strategies or interventions, if any, were used to reach or engage with the prioritized population?                                                                                       |
| 4 | What strategies or interventions, if any, were used to overcome potential challenges to access the vaccine for those populations, including strategies to improve trust and reduce hesitancy? |

304

305 To analyse KI interview data, we first employed an interpretive descriptive qualitative  
306 approach<sup>39</sup>. Transcripts were managed using NVivo 12 software and independently analysed by  
307 members of the research team (KB, MO, CD and DMV) through inductive thematic analysis. This  
308 inductive approach allowed for a deep exploration of the context surrounding vaccination  
309 strategies and implementation, facilitating the identification of patterns, categories, or themes  
310 not previously considered<sup>39,40</sup>, thereby enhancing the study's rigor by ensuring the findings  
311 were grounded in the data<sup>39</sup>.

312



313 Coding followed Creswell's approach<sup>41,42</sup>, wherein each transcript was initially read, and key  
314 ideas or responses relevant to the study objectives were independently highlighted by two  
315 team members. These ideas were then assigned a "code," with operational definitions ensuring  
316 consistent application across the data. Similar codes were grouped to form broader themes,  
317 serving as the main units of analysis<sup>41</sup>. Summaries were then developed for each theme by  
318 reviewing all coded data, a process completed by two team members (KB and MO), with  
319 revisions and consensus on themes achieved through regular meetings and discussions among  
320 team members. Any discrepancies in coding, categorization, or definitions were discussed, with  
321 consensus sought throughout the analysis process.

## 322 Results

323 Objective 1: Compare justification and timelines used by the provinces for  
324 prioritization of key populations

325 Overall provincial approaches to population prioritization and ethical frameworks used in  
326 designing vaccine rollout plans

327 Table 2 summarizes each province's overall public health approach in determining priority  
328 populations and any ethical frameworks identified. KIs confirmed that all provinces consulted  
329 NACI guidelines, including NACI's EEFA framework, to guide their decisions regarding priority  
330 populations, vaccine delivery, and storage. According to our environmental scans and KI  
331 interviews, provinces utilised a combination of age-, risk-, and health status-based approaches  
332 to select priority populations, in accordance with NACI guidelines. How provinces defined risk  
333 varied depending on their local contexts, ranging from protecting those at risk of developing

334 severe illness, minimizing transmission in workplaces or in remote regions, or maintaining the  
 335 function of critical provincial services.

336 **Table 2. Overall public health approach to population prioritization, frameworks used to**  
 337 **guide decisions, and level of adherence to NACI recommendations.**

| Province:               | Selection of priority populations based on:                                                                                                                                                                                                                          | Main frameworks, including any ethical frameworks, identified:                                                                                                                                                                    | Deviations from NACI:                                                                                                                                                                                                                                                                  |
|-------------------------|----------------------------------------------------------------------------------------------------------------------------------------------------------------------------------------------------------------------------------------------------------------------|-----------------------------------------------------------------------------------------------------------------------------------------------------------------------------------------------------------------------------------|----------------------------------------------------------------------------------------------------------------------------------------------------------------------------------------------------------------------------------------------------------------------------------------|
| <b>Alberta</b>          | Risk- then age-based prioritization<br><br><b>AIM:</b> protect those at highest risk of poor outcomes; prevent transmission, particularly in remote regions                                                                                                          | NACI’s EEFA framework*, with province-specific modifications.<br><br>Policy document titled <i>Appropriate Prioritization of Access to Health Services</i> (developed in Dec 2015) used as formal ethical framework <sup>43</sup> | Did not prioritize Black communities directly in policy rollout plan<br><br>“ <b>Hot spot</b> ” strategy employed for regional prioritization                                                                                                                                          |
| <b>British Columbia</b> | Age- and health status-based approach<br><br><b>AIM:</b> protect those at risk of developing severe illness; maintain the workforce for critical services                                                                                                            | NACI’s EEFA framework, with province-specific modifications<br><br>British Columbia Centre for Disease Control’s (BCCDC) COVID-19 Ethical Decision-Making Framework <sup>44</sup>                                                 | Did not prioritize Black communities directly in policy rollout plan<br><br>“ <b>Hot spot</b> ” strategy employed for regional prioritization                                                                                                                                          |
| <b>Manitoba</b>         | Risk-based (workplace exposures, living arrangement) followed by age-based prioritization and sustaining healthcare services<br><br><b>AIM:</b> prevent workplace exposures and sustain healthcare services, then protect those at risk of developing severe illness | NACI’s EEFA framework, with province-specific modifications<br><br>Manitoba’s Vaccine Immunization Task Force’s ‘full immunization fast’ policy <sup>45</sup>                                                                     | Did not employ a phased approach to the vaccine rollout<br><br>Did not prioritize Black communities directly in policy rollout plan<br><br>MFNPRCT* recommended First Nations children (5-11 yrs) to receive second dose within 21 days of first dose (NACI recommended 8-wk interval) |

|                    |                                                                                                                                                                                                                 |                                                                                                                                                                                                                                                                                                    | <b>“Hot spot” strategy</b> employed for regional prioritization                                                                                                                                                                                                                                                                                                                                                                                                                                                                                |
|--------------------|-----------------------------------------------------------------------------------------------------------------------------------------------------------------------------------------------------------------|----------------------------------------------------------------------------------------------------------------------------------------------------------------------------------------------------------------------------------------------------------------------------------------------------|------------------------------------------------------------------------------------------------------------------------------------------------------------------------------------------------------------------------------------------------------------------------------------------------------------------------------------------------------------------------------------------------------------------------------------------------------------------------------------------------------------------------------------------------|
| <b>Nova Scotia</b> | <p>Primarily age-based prioritization followed by risk of exposure due to difficulties adhering to public health protocols</p> <p><b>AIM:</b> prevent morbidity and mortality; sustain healthcare services.</p> | NACI’s EEFA framework, with province-specific modifications.                                                                                                                                                                                                                                       | <p>Did not prioritize certain NACI-recommended priority groups because of strict adherence to age-based rollout policy:</p> <ul style="list-style-type: none"> <li>• Individuals at risk of severe illness due to medical factors (e.g. pregnancy, disabilities, and other underlying medical health conditions)</li> <li>• Certain NACI-recommended essential workers (e.g. teachers, grocery store employees)</li> <li>• Prioritized single-dose vaccines (e.g. Janssen) for populations predicted to be challenging to follow up</li> </ul> |
| <b>Ontario</b>     | <p>Risk- and age-based prioritization</p> <p><b>AIM:</b> protect those at risk of developing severe illness</p>                                                                                                 | <p>NACI’s EEFA framework, with province-specific modifications</p> <p>Ontario COVID-19 Vaccine Distribution Task Force’s Ethical Framework<sup>49</sup> (published in Dec 2020), which was adapted from NACI’s EEFA framework</p>                                                                  | <b>“Hot spot” strategy</b> employed for regional prioritization                                                                                                                                                                                                                                                                                                                                                                                                                                                                                |
| <b>Quebec</b>      | <p>Age- then risk-based prioritization</p> <p><b>AIM:</b> protect those at risk of developing severe illness</p>                                                                                                | <p>Provincial rollout plan was primarily informed by the <a href="#">Erickson and De Wals</a> framework<sup>47</sup> (developed in 2005), which was used to guide NACI’s EEFA framework</p> <p>Quebec’s Immunization Committee (Comité sur l’Immunisation du Québec, CIQ) also consulted other</p> | <p>Did not prioritize Black communities directly in policy rollout plan</p> <p>Delayed delivery of second dose for 16 weeks (NACI recommended 21-and 28-day intervals for Pfizer and Moderna, respectively) to maximize first-dose delivery to priority groups 1-6<sup>48</sup>. Based</p>                                                                                                                                                                                                                                                     |

|  |  |                                                                                                                     |                                                                        |
|--|--|---------------------------------------------------------------------------------------------------------------------|------------------------------------------------------------------------|
|  |  | expert groups, including Canada’s NACI guidelines (EEFA framework), WHO, CDC (U.S.), JCVI (U.K.), and HAS (France)* | on success, this strategy was later adopted by NACI <sup>49,50</sup> . |
|--|--|---------------------------------------------------------------------------------------------------------------------|------------------------------------------------------------------------|

338

339 \* EEFA = Ethics, Equity, Feasibility, and Accessibility Framework; NACI = National Advisory Committee on

340 Immunization; ON-MOH = Ontario Ministry of Health; MFNPRCT = Manitoba First Nations Pandemic Response

341 Coordination Team; WHO = World Health Organization; CDC = Centers for Disease Control and Prevention; JCVI =

342 Joint Committee on Vaccination and Immunization; HAS = Haute Autorité de santé

343

344 Table 2 also summarizes notable ways in which provinces deviated from NACI guidelines based

345 on their local contexts. First, four provinces (Alberta, British Columbia, Manitoba, and Quebec)

346 did not directly prioritize Black communities in their vaccine rollout policies, despite being

347 specifically mentioned by NACI as a racialized group at higher risk of developing severe

348 outcomes due to systemic barriers to accessing healthcare<sup>27</sup>. Justifications provided by

349 provinces for this choice are discussed in the next section. Second, multiple provinces (Alberta,

350 British Columbia, Manitoba, and Ontario) employed a “hot spot” strategy for regional

351 prioritization to reach key demographics that could not be easily captured through other

352 strategies, a method that was not mentioned by NACI. Third, Quebec and Manitoba deviated

353 from NACI-recommended dosing intervals due to provincial considerations regarding how to

354 balance prioritizing those most at risk with reaching the most people amidst early vaccine

355 shortages<sup>48</sup>. Quebec’s strategy was later adopted by NACI in March 2021 because of increasing

356 scientific evidence of the usefulness of this strategy, particularly during the early vaccine

357 shortages from January to March 2021<sup>49,50</sup>. Fourth, Nova Scotia made an early decision to

358 strictly adhere to a primarily age-based rollout<sup>51-53</sup>, with very few notable exceptions that will

359 be discussed later. While age-based prioritization was consistent with NACI recommendations,  
360 Nova Scotia deviated from NACI by intentionally not prioritizing certain populations  
361 recommended in NACI's equity matrix<sup>21</sup>. This included individuals with underlying medical  
362 conditions, individuals with disabilities, as well as certain groups of essential workers<sup>25,27,52,54</sup>.  
363 Provincial justifications for this decision will be discussed later. Finally, many provinces  
364 employed a phased vaccine rollout strategy, as was consistent with NACI guidelines<sup>27</sup>, while  
365 Quebec used a similar rank-based system of prioritization (Fig 1). However, Manitoba used  
366 what it referred to as a "full immunization fast" policy rather than a phased approach<sup>45</sup>, where  
367 eligibility was based on vaccine availability. Eligibility was communicated to the public through  
368 regular COVID-19 Vaccine Bulletins and news releases.

369

370 **Fig 1. Timeline of prioritization of five key populations across six provinces.**

371 \*, \*\*, \*\*\*: Detailed list of essential worker categories is listed in Table 4.

372 Abbreviations: FN = First Nations; FNIM = First Nations, Inuit, and Métis; intellect. = intellectual; dev. =

373 developmental; CLdS = Community Living disABILITY Services

374

375 Justifications and timelines provided by the provinces for prioritization of key populations:

376 According to our environmental scans and KIs, prioritization of our study populations varied

377 between provinces. For this section, Fig 1 provides detailed timelines for prioritization by

378 province and study population. Table 3 provides a summary of justifications provided by

379 provinces for their prioritization choices.

380 **Table 3. Justification provided by provinces for their choice of prioritization of key populations.**

| <b>Justification provided</b>                                                              | <b>Black communities</b> | <b>FNIM populations</b>                                                                                                      | <b>Non-medical essential workers</b>              | <b>Individuals experiencing homelessness</b>                                                                       | <b>Individuals with disabilities</b> |
|--------------------------------------------------------------------------------------------|--------------------------|------------------------------------------------------------------------------------------------------------------------------|---------------------------------------------------|--------------------------------------------------------------------------------------------------------------------|--------------------------------------|
| High risk of transmission or severe illness due to social, economic, or structural factors | NS, ON                   | AB, MB, NS, ON, QC                                                                                                           | AB, BC, QC                                        | AB, BC, ON, QC                                                                                                     |                                      |
| High risk of severe illness due to underlying medical conditions                           |                          | MB, QC                                                                                                                       |                                                   | QC                                                                                                                 | AB, BC, MB, ON, QC                   |
| Hard to reach / remote or isolated communities                                             |                          | AB, BC, MB, ON, QC                                                                                                           |                                                   | AB, BC                                                                                                             | ON                                   |
| High risk of outbreaks due to living in congregate settings                                |                          |                                                                                                                              | BC, MB, NS                                        | AB, BC, MB, NS, ON, QC                                                                                             | BC                                   |
| Historical evidence of inequities or injustices that impact vaccine confidence/uptake      | NS, ON                   | AB, MB, ON, QC                                                                                                               |                                                   |                                                                                                                    |                                      |
| Work in critical non-medical essential services <u>and</u> unable to work from home        |                          |                                                                                                                              | BC, NS, ON, QC                                    |                                                                                                                    |                                      |
| “Hot spot” community (N/A for NS and QC)                                                   | ON                       |                                                                                                                              | BC, MB, ON                                        |                                                                                                                    |                                      |
| Real-time risk data                                                                        | ON                       | AB, MB                                                                                                                       |                                                   |                                                                                                                    | AB                                   |
| Other justification(s)                                                                     |                          | Instill community trust in provincial vaccination plan (MB)<br><br>Difficulty applying isolation measures; reduced access to | Consistently travel into and out of province (NS) | Cannot maintain public health safety protocols (QC)<br><br>Difficulty following up with transient populations (AB) |                                      |

|                 |                |                                      |  |  |    |
|-----------------|----------------|--------------------------------------|--|--|----|
|                 |                | specialized healthcare services (QC) |  |  |    |
| Not prioritized | AB, BC, MB, QC |                                      |  |  | NS |

381

382 AB = Alberta; BC = British Columbia; MB = Manitoba; NS = Nova Scotia; ON = Ontario; QC = Quebec

383 *Black communities:*

384 Black communities were the least prioritized of our five study populations, despite real-time  
385 news reports from multiple provinces showing that these communities had been  
386 disproportionately impacted by COVID-19<sup>55-58</sup>. A common justification provided by KIs for these  
387 provinces was that race-based data was not widely collected in Canada<sup>59</sup>, which limited crucial  
388 real-time evidence gathering on high-risk communities and regions.

389  
390 Of the six provinces, only Nova Scotia and Ontario clearly prioritized Black communities in  
391 published policy plans. They were one of very few exceptions to Nova Scotia's strict age-based  
392 prioritization strategy. Both the scans and our KIs stated that the provincial government's  
393 generations-long partnership building with African Nova Scotian communities was critical to  
394 successful outreach<sup>60</sup>. Early discussions with African Nova Scotian community leaders  
395 highlighted the need for immediate and extensive prioritization of Black communities due to a  
396 history of racism and the resulting lack of community trust in healthcare systems<sup>35,61</sup>.

397  
398 Although race-based data was not routinely collected in Ontario during the study period, the  
399 province prioritized Black populations living in "hot spot" communities (determined by postal  
400 code) for vaccination. Black scientists and medical experts working directly with the provincial  
401 government and the City of Toronto strongly supported this decision by sharing real-time data  
402 indicating that these "hot spot" communities were experiencing the highest rates transmission,  
403 hospitalization, and death due to COVID-19<sup>58,62,63</sup>. They further stated that vaccine hesitancy  
404 was highest among Black people of African and Caribbean origins, data consistent with NACI



405 findings<sup>27,58</sup>. However, KIs for Ontario were unclear whether Black populations living in non-“hot  
406 spot” regions were prioritized for vaccination, highlighting this as a potential gap in  
407 prioritization. One KI noted the following:

408 *“It is not just Black people in low socio-economic circumstances or hotspot*  
409 *communities who are at risk. Black people in middle income suburbs are also*  
410 *at risk because of the systemic racism that weathers the black body and*  
411 *creates patterns of chronic conditions amongst Black people across Canada.”*  
412 *- Key Informant from Ontario (ID 827)*

413  
414 While the scans did not reveal justifications through published policy documents, KIs for the  
415 other four study provinces provided insights into why Black communities were not listed in  
416 their rollout plans. KIs for Alberta stated that race-based data was not available to justify a clear  
417 need for prioritization. KIs from British Columbia stated that the province’s Black populations  
418 comprised only approximately 1% of the overall population<sup>64</sup>. KIs for Quebec asserted that not  
419 all Black communities required early prioritization and considered them to be too heterogenous  
420 in terms of risk to capture by race alone.

421  
422 According to KIs, these provinces used an intersectional approach to attempt to reach Black  
423 communities. Alberta prioritized groups that had higher risks of severe outcomes due to age or  
424 underlying medical conditions, as well those experiencing a higher risk of transmission exposure  
425 (e.g. essential workers). Quebec targeted refugees, immigrants, and essential workers for  
426 vaccination because these groups demonstrated high rates of hospitalizations and deaths.

427 British Columbia prioritized geographic areas with higher percentages of immigrants and  
428 refugees. Finally, KIs for Manitoba did not provide a rationale for why they did not prioritize  
429 their Black populations, but they stressed that the provincial focused on racialized communities  
430 more generally as an attempt to reach their Black communities.

431

432 *First Nations, Inuit, and Métis (FNIM) populations:*

433 Environmental scans and KI interviews showed that, of our study populations, the FNIM were  
434 prioritized earliest in all provinces, which was consistent with NACI guidelines<sup>25-27</sup> (Fig 1). The  
435 most common justifications provided for prioritizing FNIM populations are listed in Table 3.

436

437 Provinces employed some interesting prioritization strategies to accelerate vaccination of FNIM  
438 populations, given their respective local contexts. A few provinces (British Columbia, Manitoba,  
439 Ontario) prioritized FNIM age groups that were 15-20 years lower, on average, than that of the  
440 general population at any given point in time. KIs cited published data showing that the life  
441 expectancy for FNIM was significantly lower (e.g. up to a 17-year difference in some studies)  
442 than that of the non-Indigenous population<sup>65,66</sup>. KIs for Manitoba shared that the province did  
443 not directly prioritize remote and isolated communities in their rollout policy, which deviated  
444 from NACI guidelines<sup>26</sup>, but instead attempted to capture them indirectly through community-  
445 based “hot spot” eligibility. In Nova Scotia, the government prioritized the Mi’kmaq First Nation  
446 people first in another exception to their age-based prioritization rule. KIs explained that the  
447 Mi’kmaq were the predominant Indigenous population in Nova Scotia. By targeting vaccination  
448 efforts towards this population, they hoped to reach both remote and urban communities early

449 in the rollout. They also confirmed that any individual who identified as FNIM but who was not  
450 Mi'kmaw would have to follow the standard age-based eligibility criteria implemented for the  
451 rest of the province.

452

#### 453 *Gaps in prioritization*

454 KIs for Alberta and Manitoba shared that excellent real-time scientific evidence existed for First  
455 Nations communities (and for the Métis peoples, in the case of Alberta), clearly demonstrating  
456 that that these communities experienced significant harms related to COVID-19. This data  
457 served as critical justification for prioritizing these populations. However, similar data-sharing  
458 agreements were not in place for the Inuit in Alberta, and for both the Métis and Inuit in  
459 Manitoba. KIs stated that, unfortunately, there was insufficient risk data regarding these  
460 populations for decisionmakers to justify early prioritization without it appearing as preferential  
461 treatment. As a result, these communities were not prioritized until several months into the  
462 rollout, after reviewing real-time data from other provinces, which impeded vaccination  
463 progress at a critical stage of the rollout (see “Limitations of Data Availability” section below).

464

465 NACI guidelines recommended prioritizing urban FNIM for vaccination, as “systemic barriers to  
466 accessing necessary supportive care for COVID-19 also exist in urban settings related to factors  
467 such as poverty, systemic racism, and homelessness”<sup>26</sup>. Yet, many provinces appeared to rely  
468 mainly on age-based prioritization of all FNIM adults to capture this community, rather than on  
469 directly prioritizing this important subgroup. KIs for these provinces justified their choice by  
470 stating that they deemed risk to be higher in more remote territories than in intermediate or

471 urban communities. Other reasons given for prioritizing remote over urban settings were: (1)  
472 the higher likelihood of severe health outcomes because of underlying medical conditions and  
473 poor housing conditions in remote settings; (2) a stronger risk of uncontrolled transmission or  
474 outbreaks because of challenges in enforcing isolation measures; and (3) reduced access to  
475 specialized healthcare services if infected. Urban FNIM in Ontario were later added to the  
476 rollout plan after strong advocacy from local FNIM community leaders<sup>67,68</sup> (see “Limitations of  
477 Data Availability” section).

478

479 *Essential workers in non-healthcare settings:*

480 All provinces prioritized essential workers in non-health related occupations in the second  
481 phase of the vaccine rollout (around April 2021) after healthcare workers, which was consistent  
482 with NACI guidelines<sup>26</sup> (Fig 1). KIs for the provinces frequently stated that this timeline was also  
483 necessary because of the severe, country-wide vaccine shortages between January and March  
484 2021. The scarcity and delivery delays constrained provinces to prioritize vaccinating only their  
485 highest risk groups during those months<sup>69</sup>.

486

487 Essential workers, whether referred to as “critical workers” (Manitoba) or “priority front-line  
488 workers” (British Columbia), referred to a similar category of workers whose services could not  
489 be completed from home. Provinces adapted essential worker categories suggested by NACI to  
490 more accurately reflect critical services provided in their local contexts (Table 4). Provinces  
491 generally agreed with the NACI assertion that essential workers, who often worked in crowded  
492 conditions where public health safety protocols could not be maintained, had an increased risk

493 of COVID-19 exposure, and therefore should be prioritized<sup>27,70</sup>. Further justifications for  
 494 prioritization are summarized in Table 3.

495 **Table 4. Provincial definitions of essential workers in non-health related occupations.**

| Province         | Type of non-medical essential worker:                                                                                                                                                                                                                                                                                                                                                                                                                                                                                                                     |
|------------------|-----------------------------------------------------------------------------------------------------------------------------------------------------------------------------------------------------------------------------------------------------------------------------------------------------------------------------------------------------------------------------------------------------------------------------------------------------------------------------------------------------------------------------------------------------------|
| Alberta          | <p><b>Phase 2C (Apr 12, 2021):</b> healthcare professionals, educators and support staff, childcare and support personnel, staff working in congregate settings, shelter and correctional facility staff, meatpacking plant employees, caregivers of high-risk individuals, designated family/support persons of individuals in long-term care, and law enforcement officers (e.g. front-line policing, provincial sheriffs, firefighters, and border services staff)<sup>71</sup></p>                                                                    |
| British Columbia | <p><b>Phase 2 (Mar 15, 2021):</b> agri-food production workers (food processing plants, farms, nurseries, greenhouses, large industrial camps)</p> <p><b>Phase 3 (Apr 2021):</b> first responders (police, firefighters, emergency transport), K-12 educational staff, childcare staff, grocery store workers, postal workers, bylaw and quarantine officers, manufacturing workers, wholesale/warehousing employees, staff living in congregate housing at places such as ski hills, correctional facilities staff, and cross-border transport staff</p> |
| Manitoba         | <p><b>April 21, 2021:</b> police and firefighters aged 18+</p>                                                                                                                                                                                                                                                                                                                                                                                                                                                                                            |

|             |                                                                                                                                                                                                                                                                                                                                                                                                                                                                                                                                                                                                                                                                                                                                                                                                                     |
|-------------|---------------------------------------------------------------------------------------------------------------------------------------------------------------------------------------------------------------------------------------------------------------------------------------------------------------------------------------------------------------------------------------------------------------------------------------------------------------------------------------------------------------------------------------------------------------------------------------------------------------------------------------------------------------------------------------------------------------------------------------------------------------------------------------------------------------------|
|             | <p><b>April 24:</b> community-based eligibility (<u>hot-spots</u>) available for essential workers aged 18+ working in childcare, school settings, food processing facilities, gas stations, grocery stores, food service, public health, and workplace safety roles</p> <p>Mid-June for second dose</p>                                                                                                                                                                                                                                                                                                                                                                                                                                                                                                            |
| Nova Scotia | <p><b>Phase 1:</b> workers in the Department of Community Services facilities (e.g. adult residential centres, regional rehabilitation centres, residential care facilities)</p> <p><b>Phase 2:</b> (a) workers in correctional facilities, shelters, and temporary workers' quarters; (b) workers involved in food security (e.g., large food-processing plant workers), frontline police officers; (c) migrant workers (e.g., truck drivers and rotational workers, excluding those travelling to and from New Brunswick).</p> <p><b>Not included in prioritization:</b> teachers, grocery store employees, migrant workers</p> <p><b>Certain essential workers removed from prioritization list in Apr 2021:</b> migrant workers (truck drivers, rotational workers) and agri-food processing plant workers.</p> |
| Ontario     | <p>Not initially prioritized in rollout strategy, but later included in late Phase 2:</p>                                                                                                                                                                                                                                                                                                                                                                                                                                                                                                                                                                                                                                                                                                                           |

|        |                                                                                                                                                                                                                                                                                                                                                                                                                                                                                                                                                                                                                                                                                                                                                                                                                                                                                                                    |
|--------|--------------------------------------------------------------------------------------------------------------------------------------------------------------------------------------------------------------------------------------------------------------------------------------------------------------------------------------------------------------------------------------------------------------------------------------------------------------------------------------------------------------------------------------------------------------------------------------------------------------------------------------------------------------------------------------------------------------------------------------------------------------------------------------------------------------------------------------------------------------------------------------------------------------------|
|        | <p><b>* Highest-risk group (April 29) – cannot work from home:</b> licensed childcare and educational workers who interact directly with children</p> <p><b>** Group 1 (May 6) – workers in critical essential services:</b> school staff and workers; individuals responding to critical events (e.g., police, firefighters, etc.); inspection workers in a variety of fields (food, border, buildings, etc.); funeral workers; food and agriculture workers, migrant workers</p> <p><b>*** Group 2 (May 11) – remaining essential workers:</b> essential (electricity, communications, etc.) and critical retail workers (grocery, postal services, passport services, financial services, etc.); courts and justice system workers; transportation, warehouse, and distribution workers; waste management workers; natural gas and mine workers; uranium processing workers; and veterinary service workers</p> |
| Quebec | <p><b>Priority Rank 9 (Apr 2021):</b> agri-food production workers, primary and secondary school and daycare staff, daycare workers, public safety workers (e.g., firefighters, police officers, correctional officers), people who work in slaughterhouses, temporary foreign farm workers, mining workers in remote areas, and workers in community organizations part of the <i>Programme de soutien aux organismes communautaires</i> (Support program for community organizations, PSOC)</p>                                                                                                                                                                                                                                                                                                                                                                                                                  |

|  |                                                                           |
|--|---------------------------------------------------------------------------|
|  | <b>Not included in prioritization:</b> grocery store workers and teachers |
|--|---------------------------------------------------------------------------|

496

497 Provinces deviated from NACI guidelines in some notable ways due to local contextual factors.

498 Nova Scotia made another exception to its age-based prioritization strategy by prioritizing

499 essential workers who were not able to maintain public health guidelines effectively because of

500 the nature of their occupations<sup>52</sup>. However, certain NACI-recommended essential worker

501 categories were not included or were removed from prioritization (Table 4). According to KIs,

502 decisionmakers assessed that these subgroups would be vaccinated more efficiently through

503 age-based prioritization because of the province's small population size. In Quebec, grocery

504 store workers and teachers were not prioritized (Table 4). KIs explained that, due to limited

505 vaccine supply, Quebec prioritized older age groups followed by individuals at higher risk of

506 severe disease if infected. KIs indicated that decisionmakers found it difficult to justify

507 prioritizing occupations with younger average working ages, as they would likely have better

508 outcomes if infected over older individuals or those with underlying medical conditions.

509

510 *Individuals experiencing homelessness:*

511 As mentioned earlier, we were interested in how provinces prioritized shelter residents as well

512 as those with unstable housing situations. All provinces prioritized shelter residents in the

513 second phase of their vaccine rollout plans (Fig 1), consistent with NACI guidelines<sup>27</sup>, with

514 justifications provided in Table 3. Notably, Quebec did not initially prioritize individuals

515 experiencing homelessness, but later included them in their revised policy plan released in

516 March 2021. KIs reported that night curfews implemented across the province to curb



517 transmission led to the unintended consequence of outbreaks in congregate settings such as  
518 shelters. KIs for Nova Scotia confirmed that prioritization was based on age of shelter residents,  
519 as was consistent with the general provincial strategy.

520

### 521 *Gaps in prioritization*

522

523 By contrast, individuals experiencing homelessness but not living in shelters were only  
524 prioritized in two provinces: Alberta and Ontario (Fig 1). KIs for Alberta confirmed that they  
525 intentionally defined individuals experiencing homelessness as ‘transient populations’ in their  
526 published policy plan to include both shelter and non-shelter residents. However, it remains  
527 unclear how well this was communicated to the public, as this definition was not explicitly  
528 stated in their rollout plan. Ontario explicitly mentioned prioritizing individuals living in  
529 encampments in Phase 2 (April 2021)<sup>70</sup>. KIs for other provinces did not provide rationales for  
530 overlooking this key subgroup, aside from admitting that it was a “hard-to-reach” population.

531

### 532 *Individuals with disabilities:*

533 As mentioned earlier, we focused on individuals facing significant barriers to vaccination, which  
534 included those with developmental disabilities and those who were homebound with a  
535 disability. Of all our study populations, individuals with disabilities had the most variability in  
536 prioritization across provinces. Based on our findings, four provinces prioritized individuals with  
537 disabilities in their original vaccine rollout plans (Alberta, British Columbia, Manitoba, Ontario),  
538 adopting a tiered approach based on severity levels within this population (highest risk, high

539 risk, and at-risk)<sup>72-75</sup>. British Columbia followed NACI guidelines most closely by vaccinating  
540 those in institutionalized care in Phase 2, followed by those who were clinically extremely  
541 vulnerable due to their disability in Phase 3<sup>76</sup> (Fig 1). KIs for these provinces highlighted the  
542 importance of real-time risk data in informing their early prioritization strategy, revealing  
543 higher rates of hospitalizations, ICU admissions, death, and other severe outcomes among  
544 individuals with developmental delays or intellectual disabilities compared to the general  
545 population<sup>77,78</sup> (Table 3). In fact, despite being initially excluded from prioritization, Quebec  
546 later revised its rollout plan to include individuals with disabilities in April 2021 after reviewing  
547 real-time risk data<sup>79</sup> (see “Data Informed Prioritization Strategies” below).

548  
549 Notably, Nova Scotia intentionally did not prioritize individuals with disabilities, despite  
550 evidence that Nova Scotia had a higher percentage of individuals living with a disability  
551 compared to other provinces<sup>54,80</sup>. KIs from Nova Scotia acknowledged the heightened risk  
552 experienced by those with disabilities but once again cited that the province assessed that its  
553 age-based rollout strategy would be more efficient at reaching this population than if they were  
554 to prioritize those with underlying medical conditions.

555  
556 *Gaps in prioritization*

557 Among provinces that prioritized individuals with disabilities, those who were homebound were  
558 often prioritized later, if at all, compared to those in institutionalized settings. Information on  
559 prioritization of homebound residents for vaccination was not easily available publicly, but KIs  
560 for all provinces, except Alberta, provided some useful insights. For instance, homebound

561 individuals in Manitoba began receiving prioritization in June 2021 through the Community  
562 Living Disability Services (CLDS), which provides services for individuals with both mental and  
563 physical disabilities in the province. It was, however, unclear if homebound individuals not  
564 eligible for CLDS received prioritization or transportation services. Ontario began offering  
565 services to assist homebound individuals (both at-home services as well as transporting them to  
566 vaccination sites) in Summer 2021, and Quebec included homebound individuals in their  
567 revised plan in April 2021. Although Nova Scotia did not specifically prioritize individuals with  
568 disabilities, KIs verified that government-initiated home vaccinations for individuals with  
569 mobility issues became available in April 2021. Finally, British Columbia offered transportation  
570 services for homebound individuals upon request, although no specific timeline was provided.

571

572 Objective 2: Identify contextual factors that influenced how provinces selected  
573 priority populations for early COVID-19 vaccine access.

574 The prioritization of vaccines varied across provinces due to contextual factors specific to each  
575 region. Factors such as population demographics and geography led to the realization that no  
576 single approach, including those recommended by NACI, could be uniformly applied across all  
577 provinces. Through KI interviews, three factors emerged as significant drivers for the selection  
578 of priority populations and the corresponding timelines for early COVID-19 vaccine distribution:  
579 Data Availability, Population Size, and Geography.

580

581 Data Availability

582 Data availability often influenced whom provinces chose to prioritize and when. Provinces  
583 looked to data to determine how populations might be disproportionately negatively impacted  
584 by COVID-19 or how they experience barriers to vaccine uptake. However, presence or absence  
585 of data presented a dual role, either enabling the prioritization of key populations or preventing  
586 certain populations from receiving vaccine priority despite their high-risk level.

587

588 Data-Informed Prioritization Strategies

589 The scarcity of vaccines and the severe health risks posed by COVID-19<sup>81</sup> led to public concerns  
590 and different groups requesting to be prioritized for vaccination<sup>82-85</sup>. KI interviews and our  
591 environmental scans revealed that decision makers faced immense pressure when prioritizing  
592 certain groups over others<sup>84-90</sup>. Data gave decision makers a seemingly objective and scientific  
593 tool for answering questions such as identifying individuals most likely to contract COVID-19,  
594 those facing barriers to vaccine accessibility, and those at higher risk of severe outcomes.

595

596 For instance, Ontario employed a data-driven approach by prioritizing individuals residing in  
597 geographical “hot spot” communities, identified through historic and ongoing infectious disease  
598 trends, as previously described<sup>98</sup>. The province aimed to lower the disproportionate impacts of  
599 COVID-19 on racialized urban populations, individuals living in multigenerational households,  
600 and essential workers in non-healthcare settings through this approach<sup>91,92</sup>.

601

602 Data-driven approaches also influenced the prioritization of First Nations groups across several  
603 provinces. In Manitoba, for example, a KI highlighted that previous publications on the  
604 disproportionate negative health impacts of the 2009 H1N1 Swine Flu pandemic on First  
605 Nations<sup>93,94</sup> were leveraged by the First Nations Health and Social Secretariat of Manitoba to  
606 successfully highlight the disproportionate risk this community faced for negative COVID-19  
607 outcomes. This knowledge informed the province's decision to prioritize First Nations groups in  
608 early February, one of the earliest prioritized groups in Manitoba (Fig 1).

609  
610 In Quebec, the decision to prioritize vaccination of individuals with disabilities evolved during  
611 the rollout as a result of real-time scientific evidence. This group was not listed in the province's  
612 initial rollout plan released in January 2021 because Quebec's Ministry of Health and Social  
613 Services concluded that there was insufficient evidence of an increased risk of COVID-19  
614 infection for this population<sup>95-97</sup>. KIs from Quebec verified this sentiment, explaining that the  
615 Ministry initially found no evidence that vaccinating early would provide a noticeable benefit.  
616 However, real-time scientific data that severe outcomes among individuals with developmental  
617 delays or intellectual disabilities were higher compared to the general population proved  
618 instrumental in changing the province's stance on prioritization<sup>77,78</sup>. Quebec later revised its  
619 plan to prioritize both individuals with disabilities living in group homes in March 2021 and  
620 those living at home with families in April 2021<sup>98</sup>.

621

622 Limitations of Data Availability

623 Data availability was, however, not equitable across all population groups in Canada. The  
624 quality and quantity of data varied across population groups, leading to inequities in identifying  
625 who required prioritization. Inconsistent data availability for Inuit and Métis populations in  
626 Canada meant that these groups were not always prioritized when First Nations were, despite  
627 knowledge that they experienced similarly high risk for barriers to vaccine access and negative  
628 health outcomes<sup>99</sup>. In Manitoba, while First Nations were prioritized as early as February 2021,  
629 Inuit and Métis populations were not, despite experiencing similar disproportionate health  
630 consequences during the pandemic<sup>99</sup>. Key informants from other provinces reported similar  
631 variations in prioritization for First Nation, Métis, and Inuit populations.

632

633 We had wonderful data demonstrating that First Nations people in Manitoba  
634 were experiencing more significant harms related to COVID and at a much  
635 younger age. We knew, for example, that First Nations people who died of  
636 COVID were dying, on average, 17 years earlier than non-First Nations people.  
637 That allowed us very early on to advocate to government to have a 20-year  
638 age differential when it came to eligibility for the vaccine.

639 -Key Informant from Manitoba (ID 698)

640

641 Key informants revealed that First Nations organizations in Manitoba had established data-  
642 sharing agreements and structures before the COVID-19 pandemic with the Manitoba  
643 government. These agreements facilitated data access for the province, through the lens of

644 First Nations Principles of ownership, control, access, and possession (OCAP). OCAP are a set of  
645 standards that ensure First Nations have authority over how their data is collected, used, and  
646 shared, emphasizing self-determination and data sovereignty. These pre-established  
647 agreements and structures allowed for data availability that facilitated vaccine prioritization for  
648 First Nation groups. However, similar processes were not in place for Métis data in Manitoba.  
649 Provincial representatives presented the lack of provincial data on Métis populations as a  
650 reason why Métis and Inuit populations were not prioritized at the same time as First Nations  
651 groups. After much advocacy from Métis groups, Métis and Inuit populations were eventually  
652 prioritized in May of 2021<sup>100</sup>.

653

654 ... the province said there wasn't sufficient data to suggest that Métis and  
655 Inuit were experiencing significantly worse outcomes in terms of COVID  
656 infection and outcomes associated with COVID for them to be included in the  
657 prioritization. So, for Inuit, it was, "Well there's just so few." And then, Métis,  
658 it was, "Well we don't have data to really tell us that their outcomes are  
659 significantly worse than the general population." That was the nature of the  
660 discussions a year ago when all this started.

661 -Key Informant from Manitoba (ID 613)

662

663 An interviewee from Alberta explained that these disparities in health data availability for Métis  
664 populations stemmed from the Federal government's prioritization of data-sharing agreements  
665 with First Nations, as they fall under Federal jurisdiction through the Indian Act. Métis people

666 do not fall under federal jurisdiction, despite being section 35 recognized (one of the three  
667 indigenous peoples of Canada)<sup>101</sup>, resulting in Métis and Inuit people being left to navigate  
668 agreements with their provincial health authorities without support from the Federal  
669 government. In contrast, the Métis Nation of Alberta negotiated an information-sharing  
670 agreement with Alberta Health in 2010, so all FNIM populations were simultaneously prioritized  
671 for the COVID-19 vaccine.

672  
673 Limited data availability on important FNIM subgroups also hindered the efficiency of the  
674 rollout and impacted the trust between FNIM populations and provincial governments. As  
675 mentioned earlier, urban FNIM were not explicitly prioritized in most provinces. KIs for Ontario  
676 shared that the urban FNIM population was a critical subgroup that was missed due to a lack of  
677 sufficient data on urban population size, risk, and the health inequities faced by this group. KIs  
678 emphasized that the majority of FNIM peoples in Canada now live in cities yet were significantly  
679 undercounted in the 2016 census (e.g. by a factor of 2 to 4 in a Toronto-based study)<sup>68,102</sup>. They  
680 explained that, since historic partnerships of trust with FNIM communities had not been  
681 established prior to the pandemic, urban FNIM were considered “hard-to-reach” populations  
682 for COVID-19 vaccination and were, therefore, not efficiently prioritized early on in the rollout.  
683 Once again, strong advocacy from FNIM community leaders was required to include them in  
684 the prioritization plan.

685



686 Population Size

687 Population size influenced vaccine rollout and prioritization strategies at both the  
688 interprovincial and intraprovincial levels. Interprovincial population sizes refer to variations in  
689 population across Canadian provinces, while intraprovincial population size refers to the  
690 differences in size of population subgroups within a given province. These population sizes  
691 played a crucial role in determining which groups were deemed feasible to prioritize and  
692 shaped overall vaccine distribution strategies on a large scale.

693

694 Interprovincial Population Dynamics and Vaccine Rollout

695 Provincial population sizes influenced the perceived logistical benefits of implementing  
696 prioritization strategies beyond age-based categories. All provinces prioritized their populations  
697 based on age, the most significant risk factor for adverse COVID-19 outcomes and aligned with  
698 NACI recommendations<sup>21</sup>. However, the differentiation among provinces was the additional  
699 layers of prioritizations for certain groups apart from age. Some provinces considered their  
700 population size too small to further specify and prioritize specific population groups. As  
701 discussed earlier, KIs from Nova Scotia, for instance, revealed that the province determined  
702 that focusing on age-based prioritization would be more efficient because of the narrow time-  
703 spacing between age groups caused by the province's relatively small population. Decision  
704 makers believed that introducing additional prioritized groups would require more time and  
705 resources, whereas prioritizing solely based on age could be implemented more swiftly and  
706 effectively.

707

708 Intraprovincial Population Variability and Prioritization Strategies

709 In the case of specific ethno-racial communities, such as Black populations, some provinces  
710 found these subgroups too small in their province to justify targeting for vaccination. For Black  
711 Canadians, this sentiment is reflected in the data. More than half (52.4%) of Canada's Black  
712 population live in Ontario, followed by Quebec housing the second-largest population<sup>64</sup>. While  
713 the prairie provinces have witnessed a rapid growth rate among the Black population, provinces  
714 like British Columbia experienced slower growth<sup>64</sup>. Therefore, it is unsurprising that KIs from  
715 British Columbia referenced small population size as a reason why Black populations were not  
716 explicitly targeted, instead opting for community-based vaccine campaigns that targeted  
717 racialized groups in areas known to have a higher proportion of racialized individuals, recent  
718 immigrants, and refugees, referred to as Inclusion Groups. Additionally, the province focused  
719 on healthcare frontline worker groups, recognizing the overrepresentation of racialized workers  
720 in privatized healthcare settings. Conversely, in Toronto, a city in Ontario where 70.4% of  
721 Ontario's Black population resides, there were Black-Led Vaccine Clinics, known as the Black  
722 Health Vaccine Initiative, organized by the Black Physicians' Association of Ontario (BPAO) and  
723 several other local Black healthcare organizations<sup>88,103</sup>, with the goal of reducing barriers to  
724 vaccine uptake. This was in addition to Black communities being targeted through "hot spot"  
725 communities in Ontario.

726

727 Even when provinces did prioritize small population groups, health officials acknowledged that  
728 it may have led to suboptimal outreach efforts. In British Columbia, for example, Inuit  
729 populations were targeted for prioritization, despite making up less than 0.01% of the

730 population (0.6% of the FNIM population in British Columbia) in 2016<sup>104</sup>. However, a KI stated  
731 that outreach efforts were not as organized and effective as they could have been because of  
732 the low representation.

733  
734 Lastly, KIs noted that population size influenced the representation of certain population  
735 groups in terms of their ability to advocate effectively to government. In the early stages of the  
736 pandemic, several groups were prioritized because of their ability to gather, advocate, and be  
737 heard. However, smaller subpopulations lacked the same numbers and resources to advocate  
738 for prioritization or even recognition. For instance, when the Métis and Inuit were initially not  
739 prioritized alongside First Nations in Manitoba, the Manitoba Métis Federation had sufficient  
740 representation and resources to gather and advocate for their inclusion<sup>99,100</sup>. However,  
741 numerous other groups did not have had the same representation or resources.

742  
743 *I sat three days a week with provincial chief medical officers of health in this*  
744 *discussion and listened to other populations ... emergency workers, police, fire,*  
745 *ambulance healthcare workers, teachers, others who came together and*  
746 *lobbied very strongly to be identified as priority populations. The advantage*  
747 *we had was the [First Nations] surveillance data. We could bring that to those*  
748 *discussions and those tables on an almost daily basis. I presented it nationally*  
749 *as well to say [that] this is what made our population different and that the*  
750 *planned response needed to be different.*

751 *-Key Informant from British Columbia (ID 301)*

752 Geography

753 The geography of certain provinces also presented a logistical challenge in vaccinating and  
754 providing care to the many remote communities within Canada. Canada is the second largest  
755 country in the world by land mass, yet its land is largely uninhabited<sup>105</sup>. Most people live in the  
756 southern part of the country, near the American border<sup>105</sup>. This vast geography, coupled with a  
757 relatively small population, has led to the formation of many remote and isolated communities  
758 that are hours, if not days, away from urban centres or resources. Some communities are so  
759 remote that they require dog sleds, snowmobiles, and air services to transport medical supplies  
760 from airports to the communities that need them<sup>106</sup>.

761

762 Geographical isolation had divergent effects on provincial strategies for prioritizing remote and  
763 rural communities during the early stages of vaccine rollouts. It either presented obstacles to  
764 effective prioritization or provided a rationale for early prioritization.

765

766 In the early stages of vaccination, the COVID-19 vaccines available were delicate and required  
767 ultra-cold storage conditions. In provinces with rural and remote communities lacking the  
768 necessary infrastructure to transport and store vaccines under the required conditions,  
769 providing vaccines to these communities became a challenge. Instead, these provinces focused  
770 their attention on establishing vaccination centres within facilities that could appropriately  
771 store and disseminate early versions of the COVID-19 vaccines. As a result, provinces like  
772 Alberta and Manitoba faced limitations in effectively prioritizing remote and rural populations,  
773 including on-reserve FNIM communities.

774

775 *The transportation issue had to do with the fact that these vaccines are fairly*

776 *fragile for transportation. They don't like to be agitated too much and they*

777 *like to be super cold. Those two things also meant that in the early days, until*

778 *we had the infrastructure in place to do good transportation, we had to limit*

779 *the number of places where you could provide the vaccine.*

780 *- Key Informant from Alberta (ID 672)*

781

782 On the other hand, KIs from other provinces referenced geographical isolation as a reason why

783 remote communities were prioritized. Due to their closed and isolated nature, a COVID-19

784 outbreak could spread quickly and limited access to specialized services and health resources

785 could result in severe COVID-19 related health outcomes. Thus, provinces like British Columbia

786 regarded geographic isolation as a driving factor for prioritizing vaccination efforts in remote

787 communities.

## 788 Discussion

789 Our findings highlight the use of multi-phased approaches by several provinces, many of which

790 tailored prioritization to their local contexts considering vaccine shortages. These adaptations

791 were driven by factors such as vaccine availability, population distribution, the quality of data

792 available, and the influence of community advocacy groups.

793

794 Multiple reviews highlight a dearth of scientific literature on strategies, interventions, and

795 factors influencing equity in COVID-19 vaccination<sup>107</sup>. Our study contributes to this gap by

796 revealing, through our literature search and KI interviews, how provinces made context-driven  
797 decisions that reflected the information at hand, the needs of their populations, and the  
798 constraints they faced. However, there are key learnings that could be applied to allow for  
799 more equity-driven future rollouts. These insights revolve around how data availability and  
800 population size can influence prioritization, requiring provinces and territories to critically  
801 consider how these two factors impact vaccine rollout.

802  
803 Adopting a critical approach to understanding what data is available for decision-making, and  
804 why, is crucial to avoiding perpetuated inequities resulting from data availability. This approach  
805 entails an examination of the processes and factors that determine how and if data is collected,  
806 including consideration of potential biases or exclusion of demographic groups from data being  
807 published<sup>108-110</sup>. Additionally, to combat the issue of a lack of data, health officials and  
808 governing bodies could prioritize the collection of socio-demographic and race-based data<sup>110</sup>.  
809 Historically marginalized groups are often the ones who face the negative repercussions of  
810 insufficient population-specific data<sup>108,109,111,112</sup>, such as the under-screening of Black Canadian  
811 women for cancer despite evidence of their heightened vulnerability to worse outcomes<sup>111</sup>.  
812 Our findings echo this issue, revealing that inadequate data on populations led to limited  
813 prioritization early in the pandemic. This challenge was exacerbated by a lack of political will to  
814 bridge the data gap at the beginning of the pandemic through the collection of race-based data  
815 at vaccination, prompting an open letter to the Government of Ontario advocating for race-  
816 based data collection<sup>110,113</sup>.

817

818 Similarly, data governance issues, particularly the absence of data-sharing agreements among  
819 Métis groups, posed challenges to the prioritization of Métis populations in Alberta, Manitoba,  
820 and Nova Scotia. When considering whether to prioritize Métis groups, and other historically  
821 marginalized groups, based on available data, it is crucial to pause and inquire into why data  
822 may be absent and what assumptions decision-makers might be making due to this data  
823 gap<sup>99,108,112</sup>. A further step would be to consider how these data gaps could be filled. Relying  
824 solely on the data at hand for prioritization can be insufficient and potentially harmful, as it may  
825 perpetuate established systemic forms of exclusion.

826

827 Interviews with KIs also underscore the influence of population size and geography on COVID-  
828 19 vaccine rollout and prioritization in Canadian provinces. While all provinces prioritized based  
829 on age, additional layers of prioritization were contingent on perceived feasibility, with some  
830 provinces deeming their total population size too small to warrant further prioritization metrics  
831 that went beyond age. However, only prioritizing based age could further marginalize already  
832 disadvantaged groups. COVID-19 related hospitalization and mortality is disproportionately  
833 higher among Black, FNIM, and other racialized communities<sup>114,115</sup>. Additionally, these  
834 populations tend to be younger<sup>64,116,117</sup>. As a result, studies have indicated that COVID-19  
835 vaccine prioritization based solely on age benefits older, white populations at the expense of  
836 younger, Black, FNIM, and other racialized communities<sup>118</sup>.

837

838 Further, studies suggest that an effective vaccine prioritization strategy should adopt an  
839 intersectional and dynamic approach<sup>29,119</sup> that considers the proportion of susceptible

840 individuals in a community, including those more likely to contract the virus or who have not  
841 been previously infected<sup>119</sup>. This approach would also consider individuals with multiple risk  
842 factors, geographic and occupational risk exposures, and how interesting identities may affect  
843 risk levels<sup>29</sup>. An effective vaccine strategy should be adaptable, continually adjusting to the  
844 evolving landscape of risk factors, exposures, and susceptibilities<sup>119</sup>. The size of populations also  
845 impacted advocacy efforts, with larger groups having more resources and influence, as seen in  
846 the prioritization of Métis and Inuit alongside First Nations in Manitoba due to the Manitoba  
847 Métis Federation's effective advocacy. Smaller subpopulations faced difficulties in garnering  
848 recognition and prioritization during the early stages of the pandemic. Moving forward, it  
849 would be prudent to consider what populations may not be heard or prioritized because of a  
850 lack of visibility or resources.

851

## 852 Strengths and Limitations

853 This paper offers a comprehensive examination of provincial prioritization plans and  
854 justifications provided, aimed at ensuring equitable access to and uptake of COVID-19 vaccines  
855 five key populations in Canada at high risk of negative outcomes and/or barriers to vaccine  
856 accessing the vaccine. A major strength of our study is our direct engagement with key  
857 decision-makers who played pivotal roles in shaping provincial vaccination policies and  
858 strategies. By interviewing these individuals, we gained unique insights into the thought  
859 processes, considerations, and challenges that informed the development and implementation  
860 of vaccination plans at the provincial level.

861



862 While our research aimed to be comprehensive and representative of all Canadian jurisdictions,  
863 there were limitations. First, our study focused on six provinces due to availability of published  
864 documents during the study period, potentially overlooking valuable insights from excluded  
865 provinces and territories. Nevertheless, we sought to encompass provinces with diverse  
866 geographical, demographic, and linguistic characteristics to ensure a broader representation of  
867 Canadian contexts. Second, we only interviewed a few KIs per province; therefore, the  
868 perspectives gathered may not represent those of the entire province. However, we conducted  
869 interviews until saturation was reached and aimed to capture a range of perspectives from key  
870 decision-makers involved in vaccine rollout efforts. Third, while our qualitative interviews and  
871 environmental scans aimed to capture all relevant strategies and interventions, it is possible  
872 that some initiatives may have been overlooked if they were not publicly accessible when  
873 environmental scans were completed nor mentioned by our KIs, despite our efforts to keep our  
874 environmental scans as up-to-date as possible. Additionally, NACI guidelines and provincial  
875 policy plan documents were regularly updated throughout the course of the rollout. This  
876 proved to be challenging when asking KIs to recall prioritization decisions that were made at  
877 the planning phase. To mitigate these challenges, our team regularly verified and recorded  
878 policy updates by date during the study period.

879  
880 Moving forward, future research endeavors should expand beyond the scope of this study to  
881 evaluate the other four dimensions of the RE-AIM implementation framework for assessing  
882 vaccine rollout initiatives, including effectiveness, adoption, implementation, and maintenance.  
883 Moreover, the active involvement of priority populations in research design and interpretation

884 will be crucial for ensuring that future vaccination efforts align with the needs and perspectives  
885 of diverse communities.

## 886 Conclusion

887 Our work delves into the equitable distribution of COVID-19 vaccines across six Canadian  
888 provinces, revealing nuanced variations driven by factors such as vaccine availability,  
889 demographics, and early community-led partnerships. It examines how provincial policies  
890 allowed tailored local responses that addressed NACI's equity-informed recommendations. Our  
891 research fills gaps in the literature by elucidating the context-driven decision-making behind  
892 vaccine prioritization, emphasizing the need for expanded data availability to include socio-  
893 demographic and race-based data. Our findings provide key learnings for equitable vaccine  
894 distribution in future mass vaccination emergency situations in Canada and globally.

## 895 Acknowledgements

896 We extend our sincere gratitude to our key informants for sharing their invaluable time and  
897 perspectives in this study. We also wish to thank the Implementation Science Trainee Cluster,  
898 along with the professors and students at the Dalla Lana School of Public Health, University of  
899 Toronto, for their mentorship and feedback, which were instrumental in shaping this work.

## 900 References

- 901 1. Liang, S. T., Liang, L. T., & Rosen, J. M. (2021). COVID-19: a comparison to the 1918 influenza  
902 and how we can defeat it. *Postgraduate Medical Journal*, 97(1147), 273.  
903 <https://doi.org/10.1136/POSTGRADMEDJ-2020-139070>
- 904 2. Wouters, O. J., Shadlen, K. C., Salcher-Konrad, M., Pollard, A. J., Larson, H. J.,  
905 Teerawattananon, Y., & Jit, M. (2021). Challenges in ensuring global access to COVID-19  
906 vaccines: production, affordability, allocation, and deployment. *Health Policy*  
907 *Www.TheLancet.Com*, 397. [https://doi.org/10.1016/S0140-6736\(21\)00306-8](https://doi.org/10.1016/S0140-6736(21)00306-8)
- 908 3. *Summary of evidence supporting COVID-19 public health measures - Canada.ca*. (n.d.).  
909 Retrieved August 4, 2024, from [https://www.canada.ca/en/public-](https://www.canada.ca/en/public-health/services/diseases/2019-novel-coronavirus-infection/guidance-documents/summary-evidence-supporting-covid-19-public-health-measures.html)  
910 [health/services/diseases/2019-novel-coronavirus-infection/guidance-](https://www.canada.ca/en/public-health/services/diseases/2019-novel-coronavirus-infection/guidance-documents/summary-evidence-supporting-covid-19-public-health-measures.html)  
911 [documents/summary-evidence-supporting-covid-19-public-health-measures.html](https://www.canada.ca/en/public-health/services/diseases/2019-novel-coronavirus-infection/guidance-documents/summary-evidence-supporting-covid-19-public-health-measures.html)
- 912 4. Rachel Aiello. (2021, February 4). *Coronavirus: Canada to keep feeling impacts of vaccine*  
913 *delivery issues in coming shipments: Fortin*. CTV News.  
914 [https://www.ctvnews.ca/health/coronavirus/canada-to-keep-feeling-impacts-of-covid-19-](https://www.ctvnews.ca/health/coronavirus/canada-to-keep-feeling-impacts-of-covid-19-vaccine-delivery-issues-fortin-1.5295698)  
915 [vaccine-delivery-issues-fortin-1.5295698](https://www.ctvnews.ca/health/coronavirus/canada-to-keep-feeling-impacts-of-covid-19-vaccine-delivery-issues-fortin-1.5295698)
- 916 5. Goldstein, L. (2021, April 21). *Vaccine shortage means longer pandemic for Canada*. Toronto  
917 Sun. [https://torontosun.com/opinion/columnists/goldstein-vaccine-shortage-means-](https://torontosun.com/opinion/columnists/goldstein-vaccine-shortage-means-longer-pandemic-for-canada)  
918 [longer-pandemic-for-canada](https://torontosun.com/opinion/columnists/goldstein-vaccine-shortage-means-longer-pandemic-for-canada)
- 919 6. Slaughter, G. (2021, January 26). *Explained: What the Pfizer shortage means for Canada's*  
920 *vaccine rollout*. CTV News. [https://www.ctvnews.ca/health/coronavirus/explained-what-](https://www.ctvnews.ca/health/coronavirus/explained-what-the-pfizer-shortage-means-for-canada-s-vaccine-rollout-1.5283261)  
921 [the-pfizer-shortage-means-for-canada-s-vaccine-rollout-1.5283261](https://www.ctvnews.ca/health/coronavirus/explained-what-the-pfizer-shortage-means-for-canada-s-vaccine-rollout-1.5283261)

- 922 7. Pfizer. (2021, February 19). *Pfizer and BioNTech Submit COVID-19 Vaccine Stability Data at*  
923 *Standard Freezer Temperature to the U.S. FDA*. [https://www.pfizer.com/news/press-](https://www.pfizer.com/news/press-release/press-release-detail/pfizer-and-biontech-submit-covid-19-vaccine-stability-data)  
924 [release/press-release-detail/pfizer-and-biontech-submit-covid-19-vaccine-stability-data](https://www.pfizer.com/news/press-release/press-release-detail/pfizer-and-biontech-submit-covid-19-vaccine-stability-data)
- 925 8. Kis, Z. (2022). Stability Modelling of mRNA Vaccine Quality Based on Temperature Monitoring  
926 throughout the Distribution Chain. *Pharmaceutics*, 14(2).  
927 <https://doi.org/10.3390/PHARMACEUTICS14020430>
- 928 9. Uddin, M. N., & Roni, M. A. (2021). Challenges of Storage and Stability of mRNA-Based  
929 COVID-19 Vaccines. *Vaccines*, 9(9). <https://doi.org/10.3390/VACCINES9091033>
- 930 10. CBC News. (2021, May 19). *Canada's change to Pfizer vaccine storage temperature has*  
931 *major implications on rollout*. [https://www.cbc.ca/news/health/pfizer-vaccine-canada-](https://www.cbc.ca/news/health/pfizer-vaccine-canada-storage-temperature-1.6031823)  
932 [storage-temperature-1.6031823](https://www.cbc.ca/news/health/pfizer-vaccine-canada-storage-temperature-1.6031823)
- 933 11. CBC News. (2020, November 11). *Why rollout of COVID-19 vaccine could be "the most*  
934 *difficult part" in Canada*. [https://www.cbc.ca/news/health/coronavirus-canada-covid-19-](https://www.cbc.ca/news/health/coronavirus-canada-covid-19-vaccine-rollout-1.5797082)  
935 [vaccine-rollout-1.5797082](https://www.cbc.ca/news/health/coronavirus-canada-covid-19-vaccine-rollout-1.5797082)
- 936 12. CBC Radio. (2020, November 29). *What transporting ice cream across Canada tells us about*  
937 *vaccine logistics*. [https://www.cbc.ca/radio/costofliving/cold-chain-logistics-difficult-](https://www.cbc.ca/radio/costofliving/cold-chain-logistics-difficult-decisions-and-the-changing-demands-sex-workers-face-from-covid-19-1.5820072/what-transporting-ice-cream-across-canada-tells-us-about-vaccine-logistics-1.5820080)  
938 [decisions-and-the-changing-demands-sex-workers-face-from-covid-19-1.5820072/what-](https://www.cbc.ca/radio/costofliving/cold-chain-logistics-difficult-decisions-and-the-changing-demands-sex-workers-face-from-covid-19-1.5820072/what-transporting-ice-cream-across-canada-tells-us-about-vaccine-logistics-1.5820080)  
939 [transporting-ice-cream-across-canada-tells-us-about-vaccine-logistics-1.5820080](https://www.cbc.ca/radio/costofliving/cold-chain-logistics-difficult-decisions-and-the-changing-demands-sex-workers-face-from-covid-19-1.5820072/what-transporting-ice-cream-across-canada-tells-us-about-vaccine-logistics-1.5820080)
- 940 13. Canadian Public Health Association. (2021, December 14). *Health organizations and*  
941 *professionals call on Government of Canada to live up to commitments on vaccine equity*.  
942 [https://www.cpha.ca/health-organizations-and-professionals-call-government-canada-](https://www.cpha.ca/health-organizations-and-professionals-call-government-canada-live-commitments-vaccine-equity)  
943 [live-commitments-vaccine-equity](https://www.cpha.ca/health-organizations-and-professionals-call-government-canada-live-commitments-vaccine-equity)

- 944 14. Stephanie Dubois. (2021, December 3). *Canada should focus on vaccine equity — not travel*  
945 *bans — human rights advocate, doctors say | CBC News*. CBC News.  
946 <https://www.cbc.ca/news/health/vaccine-equity-canada-1.6268609>
- 947 15. van der Graaf, R., Browne, J. L., & Baidjoe, A. Y. (2022). Vaccine equity: Past, present, and  
948 future. *Cell Reports Medicine*, 3(3), 100551. <https://doi.org/10.1016/J.XCRM.2022.100551>
- 949 16. United Nations. (2021, February 17). *Secretary-General Calls Vaccine Equity Biggest Moral*  
950 *Test for Global Community, as Security Council Considers Equitable Availability of Doses |*  
951 *Meetings Coverage and Press Releases*. <https://press.un.org/en/2021/sc14438.doc.htm>
- 952 17. Fidler, D. P. (2010). Negotiating Equitable Access to Influenza Vaccines: Global Health  
953 Diplomacy and the Controversies Surrounding Avian Influenza H5N1 and Pandemic  
954 Influenza H1N1. *PLOS Medicine*, 7(5), e1000247.  
955 <https://doi.org/10.1371/JOURNAL.PMED.1000247>
- 956 18. Government of Canada. (2023, July 4). *COVID-19: Canada's Global Initiative for Vaccine*  
957 *Equity*. [https://www.international.gc.ca/world-monde/issues\\_development-](https://www.international.gc.ca/world-monde/issues_development-enjeux_developpement/global_health-sante_mondiale/equite_vaccinale_covid-19_vaccine_equity.aspx?lang=eng)  
958 [enjeux\\_developpement/global\\_health-sante\\_mondiale/equite\\_vaccinale\\_covid-](https://www.international.gc.ca/world-monde/issues_development-enjeux_developpement/global_health-sante_mondiale/equite_vaccinale_covid-19_vaccine_equity.aspx?lang=eng)  
959 [19\\_vaccine\\_equity.aspx?lang=eng](https://www.international.gc.ca/world-monde/issues_development-enjeux_developpement/global_health-sante_mondiale/equite_vaccinale_covid-19_vaccine_equity.aspx?lang=eng)
- 960 19. Moore, S., Hill, E. M., Dyson, L., Tildesley, M. J., & Keeling, M. J. (2024). Retrospectively  
961 modeling the effects of increased global vaccine sharing on the COVID-19 pandemic.  
962 *Nature Medicine*, 28, 2416–2423. <https://doi.org/10.1038/s41591-022-02064-y>
- 963 20. World Health Organization. (2021, July 20). *No one is safe from COVID-19 until everyone is*  
964 *safe*. [https://www.who.int/news-room/photo-story/photo-story-detail/No-one-is-safe-](https://www.who.int/news-room/photo-story/photo-story-detail/No-one-is-safe-from-COVID19-until-everyone-is-safe)  
965 [from-COVID19-until-everyone-is-safe](https://www.who.int/news-room/photo-story/photo-story-detail/No-one-is-safe-from-COVID19-until-everyone-is-safe)

- 966 21. National Advisory Committee on Immunization. (2020). Appendix D: Equity matrix applied  
967 to COVID-19 with evidence to date. In *Vaccine* (Vol. 38, Issue 36). Elsevier Ltd.  
968 <https://doi.org/10.1016/J.VACCINE.2020.05.051>
- 969 22. Government of Canada. (2019, September 17). *Canada's Health Care System - Canada.ca*.  
970 [https://www.canada.ca/en/health-canada/services/health-care-system/reports-  
971 publications/health-care-system/canada.html](https://www.canada.ca/en/health-canada/services/health-care-system/reports-<br/>971 publications/health-care-system/canada.html)
- 972 23. Ismail, S. J., Hardy, K., Tunis, M. C., Young, K., Sicard, N., & Quach, C. (2020). A framework  
973 for the systematic consideration of ethics, equity, feasibility, and acceptability in vaccine  
974 program recommendations. *Vaccine*, 38(36), 5876.  
975 <https://doi.org/10.1016/J.VACCINE.2020.05.051>
- 976 24. *Archived 5: NACI rapid response: Extended dose intervals for COVID-19 vaccines to optimize  
977 early vaccine rollout and population protection in Canada [2021-03-03] - Canada.ca*. (n.d.).  
978 Retrieved July 4, 2024, from [https://www.canada.ca/en/public-  
979 health/services/immunization/national-advisory-committee-on-immunization-naci/rapid-  
980 response-extended-dose-intervals-covid-19-vaccines-early-rollout-population-  
981 protection.html](https://www.canada.ca/en/public-<br/>979 health/services/immunization/national-advisory-committee-on-immunization-naci/rapid-<br/>980 response-extended-dose-intervals-covid-19-vaccines-early-rollout-population-<br/>981 protection.html)
- 982 25. *Archived: Preliminary guidance on key populations for early COVID-19 immunization [2020-  
983 11-03] - Canada.ca*. (n.d.). Retrieved July 4, 2024, from [https://www.canada.ca/en/public-  
984 health/services/immunization/national-advisory-committee-on-immunization-  
985 naci/guidance-key-populations-early-covid-19-immunization.html](https://www.canada.ca/en/public-<br/>984 health/services/immunization/national-advisory-committee-on-immunization-<br/>985 naci/guidance-key-populations-early-covid-19-immunization.html)
- 986 26. *Archived: Guidance on the prioritization of initial doses of COVID-19 vaccine(s) [2020-12-18]  
987 - Canada.ca*. (n.d.). Retrieved July 4, 2024, from <https://www.canada.ca/en/public->

- 988 health/services/immunization/national-advisory-committee-on-immunization-  
989 naci/guidance-prioritization-initial-doses-covid-19-vaccines.html
- 990 27. Archived: Guidance on the prioritization of key populations for COVID-19 immunization  
991 [2021-02-12] - Canada.ca. (n.d.). Retrieved July 4, 2024, from  
992 [https://www.canada.ca/en/public-health/services/immunization/national-advisory-  
995 committee-on-immunization-naci/guidance-prioritization-key-populations-covid-19-  
996 vaccination.html](https://www.canada.ca/en/public-health/services/immunization/national-advisory-<br/>993 committee-on-immunization-naci/guidance-prioritization-key-populations-covid-19-<br/>994 vaccination.html)
- 995 28. AlShurman, B. A., Tetui, M., Nanyonjo, A., Butt, Z. A., Waite, N. M., Vernon-Wilson, E.,  
996 Wong, G., & Grindrod, K. (2023). Understanding the COVID-19 Vaccine Policy Terrain in  
997 Ontario Canada: A Policy Analysis of the Actors, Content, Processes, and Context. *Vaccines*,  
998 *11*(4), 782. <https://doi.org/10.3390/VACCINES11040782>
- 999 29. McAlister, F. A., Bushnik, T., Leung, A. A., & Saxinger, L. (2021). Informing COVID-19  
1000 vaccination priorities based on the prevalence of risk factors among adults in Canada.  
1001 *CMAJ*, *193*(17), E617–E621. [https://doi.org/10.1503/CMAJ.210529/TAB-RELATED-  
1003 CONTENT](https://doi.org/10.1503/CMAJ.210529/TAB-RELATED-<br/>1002 CONTENT)
- 1003 30. Bashir, K., Ouedraogo, M., Dharma, C., Sobers, M., Atukorale, V., Mauer-Vakil, D.,  
1004 Atallahjan, A., Fadel, S., & Allin, S. (2024). Strengthening access to and confidence in  
1005 COVID-19 vaccines among equity-deserving populations across Canada: An exploratory  
1006 qualitative study . [*Manuscript Submitted for Publication*].
- 1007 31. Mauer-Vakil, D., Dharma, C., Sobers, M., Kainat Bashir, M. , Vajini Atukorale, M. , &  
1008 Ouedraogo, M. (2023). Lessons Learned Conducting Implementation Science Research on

- 1009 the COVID-19 Vaccination Rollout During a Global Pandemic. *Healthy Populations Journal*,
- 1010 3(4). <https://doi.org/10.15273/HPJ.V3I4.11588>
- 1011 32. Tong, A., Sainsbury, P., & Craig, J. (2007). Consolidated criteria for reporting qualitative
- 1012 research (COREQ): a 32-item checklist for interviews and focus groups. *International*
- 1013 *Journal for Quality in Health Care*, 19(6), 349–357.
- 1014 <https://doi.org/10.1093/intqhc/mzm042>
- 1015 33. Grant, T. (2023, December 17). *N.S. Black health and wellness clinics aim to break down*
- 1016 *health inequities*. CBC News. [https://www.cbc.ca/news/canada/nova-scotia/nova-scotia-](https://www.cbc.ca/news/canada/nova-scotia/nova-scotia-black-health-wellness-clinics-1.7062078)
- 1017 [black-health-wellness-clinics-1.7062078](https://www.cbc.ca/news/canada/nova-scotia/nova-scotia-black-health-wellness-clinics-1.7062078)
- 1018 34. Smith, E. (2021, April 8). *N.S. holds first vaccine clinic in Black Nova Scotian community*. CBC
- 1019 News. [https://www.cbc.ca/news/canada/nova-scotia/african-nova-scotian-vaccine-clinic-](https://www.cbc.ca/news/canada/nova-scotia/african-nova-scotian-vaccine-clinic-shots-upper-hammonds-planes-1.5979749)
- 1020 [shots-upper-hammonds-planes-1.5979749](https://www.cbc.ca/news/canada/nova-scotia/african-nova-scotian-vaccine-clinic-shots-upper-hammonds-planes-1.5979749)
- 1021 35. Smith, E. (2021, April 8). *N.S. holds first vaccine clinic in Black Nova Scotian community*. CBC
- 1022 News. [https://www.cbc.ca/news/canada/nova-scotia/african-nova-scotian-vaccine-clinic-](https://www.cbc.ca/news/canada/nova-scotia/african-nova-scotian-vaccine-clinic-shots-upper-hammonds-planes-1.5979749)
- 1023 [shots-upper-hammonds-planes-1.5979749](https://www.cbc.ca/news/canada/nova-scotia/african-nova-scotian-vaccine-clinic-shots-upper-hammonds-planes-1.5979749)
- 1024 36. Naderifar, M., Goli, H., & Ghaljaie, F. (2017). Snowball Sampling: A Purposeful Method of
- 1025 Sampling in Qualitative Research. *Strides in Development of Medical Education*, 14(3).
- 1026 <https://doi.org/10.5812/SDME.67670>
- 1027 37. Gaglio, B., Shoup, J. A., & Glasgow, R. E. (2013). The RE-AIM framework: a systematic review
- 1028 of use over time. *American Journal of Public Health*, 103(6).
- 1029 <https://doi.org/10.2105/AJPH.2013.301299>



- 1030 38. Shaw, R. B., Sweet, S. N., McBride, C. B., Adair, W. K., & Martin Ginis, K. A. (2019).  
1031 Operationalizing the reach, effectiveness, adoption, implementation, maintenance (RE-  
1032 AIM) framework to evaluate the collective impact of autonomous community programs  
1033 that promote health and well-being. *BMC Public Health*, *19*(1), 1–14.  
1034 <https://doi.org/10.1186/S12889-019-7131-4/TABLES/1>
- 1035 39. Thorne, S. E. (Sally E. (2016). *Interpretive description : qualitative research for applied*  
1036 *practice* (2nd ed.). Routledge. [https://www.routledge.com/Interpretive-Description-](https://www.routledge.com/Interpretive-Description-Qualitative-Research-for-Applied-Practice/Thorne/p/book/9781629582993)  
1037 [Qualitative-Research-for-Applied-Practice/Thorne/p/book/9781629582993](https://www.routledge.com/Interpretive-Description-Qualitative-Research-for-Applied-Practice/Thorne/p/book/9781629582993)
- 1038 40. Azungah, T. (2018). Qualitative research: deductive and inductive approaches to data  
1039 analysis. *Qualitative Research Journal*, *18*(4), 383–400. [https://doi.org/10.1108/QRJ-D-18-](https://doi.org/10.1108/QRJ-D-18-00035)  
1040 [00035](https://doi.org/10.1108/QRJ-D-18-00035)
- 1041 41. John W. Creswell. (2012). *Educational research: Planning, conducting, and evaluating*  
1042 *quantitative and qualitative research* (4th ed.). Pearson.
- 1043 42. Charrier, L., Garlasco, J., Thomas, R., Gardois, P., Bo, M., & Zotti, C. M. (2022). An Overview  
1044 of Strategies to Improve Vaccination Compliance before and during the COVID-19  
1045 Pandemic. *International Journal of Environmental Research and Public Health*, *19*, 11044.  
1046 <https://doi.org/10.3390/ijerph191711044>
- 1047 43. Alberta Health Services. (2021). *Appropriate Prioritization of Access to Health Services*.  
1048 [www.ahs.ca](http://www.ahs.ca),
- 1049 44. British Columbia Centre for Disease Control & British Columbia Ministry of Health. (2020).  
1050 *COVID-19 Ethical Decision-Making Framework*.

- 1051 45. Government of Manitoba. (2021). *COVID-19 VACCINATION IN MANITOBA TASK FORCE*  
1052 *UPDATE*. [https://manitoba.ca/asset\\_library/en/covid/vaccination-modelling-01202021.pdf](https://manitoba.ca/asset_library/en/covid/vaccination-modelling-01202021.pdf)
- 1053 46. Covid-, O., & Distribution Task Force, V. (n.d.). *Ethical Framework for COVID-19 Vaccine*  
1054 *Distribution*.
- 1055 47. Erickson, L. J., De Wals, P., & Farand, L. (2005). An analytical framework for immunization  
1056 programs in Canada. *Vaccine*, 23(19), 2470–2476.  
1057 <https://doi.org/10.1016/J.VACCINE.2004.10.029>
- 1058 48. Ministère de la Santé et des Services sociaux. (2021, March 3). *Pandémie de la COVID-19 -*  
1059 *Un intervalle de 16 semaines entre les deux doses de vaccin*.  
1060 <https://www.msss.gouv.qc.ca/ministere/salle-de-presse/communique-2676/>
- 1061 49. Government of Canada. (2021, October 22). *Recommendations on the use of COVID-19*  
1062 *vaccines*. [https://www.canada.ca/en/public-health/services/immunization/national-](https://www.canada.ca/en/public-health/services/immunization/national-advisory-committee-on-immunization-naci/recommendations-use-covid-19-vaccines.html)  
1063 [advisory-committee-on-immunization-naci/recommendations-use-covid-19-vaccines.html](https://www.canada.ca/en/public-health/services/immunization/national-advisory-committee-on-immunization-naci/recommendations-use-covid-19-vaccines.html)
- 1064 50. Miller, A. (2021, March 6). *A behind-the-scenes look at why Canada delayed 2nd doses of*  
1065 *COVID-19 vaccines*. CBC News. [https://www.cbc.ca/news/health/canada-covid-19-vaccine-](https://www.cbc.ca/news/health/canada-covid-19-vaccine-delay-risk-1.5939134)  
1066 [delay-risk-1.5939134](https://www.cbc.ca/news/health/canada-covid-19-vaccine-delay-risk-1.5939134)
- 1067 51. Government of Nova Scotia. (2021, January 5). *Update on Nova Scotia's COVID-19*  
1068 *Immunization Plan*. News Release. [https://news.novascotia.ca/en/2021/01/05/update-](https://news.novascotia.ca/en/2021/01/05/update-nova-scotias-covid-19-immunization-plan)  
1069 [nova-scotias-covid-19-immunization-plan](https://news.novascotia.ca/en/2021/01/05/update-nova-scotias-covid-19-immunization-plan)
- 1070 52. Government of Nova Scotia. (2021, February 3). *Update on Nova Scotia's COVID-19*  
1071 *Immunization Plan*. News Release. [https://news.novascotia.ca/en/2021/02/03/update-](https://news.novascotia.ca/en/2021/02/03/update-nova-scotias-covid-19-immunization-plan)  
1072 [nova-scotias-covid-19-immunization-plan](https://news.novascotia.ca/en/2021/02/03/update-nova-scotias-covid-19-immunization-plan)

- 1073 53. Habbick, M., Allin, S., Camillo, C. A., Fitzpatrick, T. A., Mauer-Vakil, D., Muhajarine, N.,  
1074 Roerig, M., & Rowein, S. (2022). COVID-19 Vaccination Rollout: Nova Scotia. CoVaRR-Net  
1075 and North American Observatory on Health Systems and Policies. *COVID-19 Vaccination*  
1076 *Rollout Monitor*.
- 1077 54. Sullivan, N. (2021, March 7). *Disabled Nova Scotians question why they can't get early*  
1078 *COVID-19 shots*. Saltwire. [https://www.saltwire.com/nova-scotia/news/provincial/high-](https://www.saltwire.com/nova-scotia/news/provincial/high-risk-but-no-jab-disabled-nova-scotians-question-why-they-cant-get-early-covid-19-shots-560668/)  
1079 [risk-but-no-jab-disabled-nova-scotians-question-why-they-cant-get-early-covid-19-shots-](https://www.saltwire.com/nova-scotia/news/provincial/high-risk-but-no-jab-disabled-nova-scotians-question-why-they-cant-get-early-covid-19-shots-560668/)  
1080 [560668/](https://www.saltwire.com/nova-scotia/news/provincial/high-risk-but-no-jab-disabled-nova-scotians-question-why-they-cant-get-early-covid-19-shots-560668/)
- 1081 55. Olanlesi-Aliu, A., Kemei, J., Alaazi, D., Tunde-Byass, M., Renzaho, A., Sekyi-Out, A., Mullings,  
1082 D. V., Osei-Tutu, K., & Salami, B. (2024). COVID-19 among Black people in Canada: a  
1083 scoping review. *Health Promotion and Chronic Disease Prevention in Canada, 44*(3), 112–  
1084 125. <https://doi.org/10.24095/HPCDP.44.3.05>
- 1085 56. *Race-based data must be collected to help fight COVID-19, advocates say | CBC News*. (n.d.).  
1086 Retrieved July 5, 2024, from [https://www.cbc.ca/news/canada/calgary/demographic-data-](https://www.cbc.ca/news/canada/calgary/demographic-data-collection-data-alberta-anti-racism-1.5680698)  
1087 [collection-data-alberta-anti-racism-1.5680698](https://www.cbc.ca/news/canada/calgary/demographic-data-collection-data-alberta-anti-racism-1.5680698)
- 1088 57. *COVID-19 disproportionately impacting BIPOC communities in Manitoba: report | CTV News*.  
1089 (n.d.). Retrieved July 5, 2024, from [https://winnipeg.ctvnews.ca/new-report-shows-the-](https://winnipeg.ctvnews.ca/new-report-shows-the-disproportionate-impact-of-covid-19-on-manitoba-s-bipoc-communities-1.5329076?cache=emuosurrypzum)  
1090 [disproportionate-impact-of-covid-19-on-manitoba-s-bipoc-communities-](https://winnipeg.ctvnews.ca/new-report-shows-the-disproportionate-impact-of-covid-19-on-manitoba-s-bipoc-communities-1.5329076?cache=emuosurrypzum)  
1091 [1.5329076?cache=emuosurrypzum](https://winnipeg.ctvnews.ca/new-report-shows-the-disproportionate-impact-of-covid-19-on-manitoba-s-bipoc-communities-1.5329076?cache=emuosurrypzum)
- 1092 58. *Black neighbourhoods in Toronto are hit hardest by COVID-19 — and it's 'anchored in*  
1093 *racism': experts | Globalnews.ca*. (n.d.). Retrieved July 4, 2024, from  
1094 <https://globalnews.ca/news/7015522/black-neighbourhoods-toronto-coronavirus-racism/>

- 1095 59. *Early signs suggest race matters when it comes to COVID-19. So why isn't Canada collecting*  
1096 *race-based data? | CBC News.* (n.d.). Retrieved July 4, 2024, from  
1097 <https://www.cbc.ca/news/canada/toronto/race-coronavirus-canada-1.5536168>
- 1098 60. *Nova Scotia enlists historically Black churches to help get COVID-19 vaccine to African Nova*  
1099 *Scotians - The Globe and Mail.* (n.d.). Retrieved July 4, 2024, from  
1100 [https://www.theglobeandmail.com/canada/article-nova-scotia-enlists-historically-black-](https://www.theglobeandmail.com/canada/article-nova-scotia-enlists-historically-black-churches-to-help-get-covid-19/)  
1101 [churches-to-help-get-covid-19/](https://www.theglobeandmail.com/canada/article-nova-scotia-enlists-historically-black-churches-to-help-get-covid-19/)
- 1102 61. Renić, K. (2021, February 3). *Coronavirus: Nova Scotia updates its COVID-19 vaccination*  
1103 *plan.* Global News. [https://globalnews.ca/news/7617434/nova-scotia-updates-covid-19-](https://globalnews.ca/news/7617434/nova-scotia-updates-covid-19-vaccination-plan/)  
1104 [vaccination-plan/](https://globalnews.ca/news/7617434/nova-scotia-updates-covid-19-vaccination-plan/)
- 1105 62. *Black Scientists' Task Force on Vaccine Equity – City of Toronto.* (n.d.). Retrieved July 4,  
1106 2024, from <https://www.toronto.ca/news/black-scientists-task-force-on-vaccine-equity/>
- 1107 63. *City of Toronto partners with Black, South Asian and Persons with Disabilities Organizations*  
1108 *to Support the Vaccine Campaign – City of Toronto.* (n.d.). Retrieved July 4, 2024, from  
1109 [https://www.toronto.ca/news/city-of-toronto-partners-with-black-south-asian-and-](https://www.toronto.ca/news/city-of-toronto-partners-with-black-south-asian-and-persons-with-disabilities-organizations-to-support-the-vaccine-campaign/)  
1110 [persons-with-disabilities-organizations-to-support-the-vaccine-campaign/](https://www.toronto.ca/news/city-of-toronto-partners-with-black-south-asian-and-persons-with-disabilities-organizations-to-support-the-vaccine-campaign/)
- 1111 64. Statistics Canada. (2019). *Diversity of the Black population in Canada: An overview.*  
1112 <https://www150.statcan.gc.ca/n1/pub/89-657-x/89-657-x2019002-eng.htm>
- 1113 65. Smylie, J., Firestone, M., & Spiller, M. W. (2018). Our health counts: population-based  
1114 measures of urban Inuit health determinants, health status, and health care access.  
1115 *Canadian Journal of Public Health = Revue Canadienne de Santé Publique, 109(5–6), 662.*  
1116 <https://doi.org/10.17269/S41997-018-0111-0>

- 1117 66. *Life expectancy of First Nations, Métis and Inuit household populations in Canada*. (n.d.).  
1118 Retrieved July 6, 2024, from <https://www150.statcan.gc.ca/n1/pub/82-003->  
1119 [x/2019012/article/00001-eng.htm](https://www150.statcan.gc.ca/n1/pub/82-003-x/2019012/article/00001-eng.htm)
- 1120 67. *Here's how community groups are getting COVID-19 vaccinations to Indigenous people in*  
1121 *Canada's largest city | CBC News*. (n.d.). Retrieved July 6, 2024, from  
1122 <https://www.cbc.ca/news/canada/toronto/covid-19-vaccination-outreach-indigenous->  
1123 [people-1.5949046](https://www.cbc.ca/news/canada/toronto/covid-19-vaccination-outreach-indigenous-people-1.5949046)
- 1124 68. Rotondi, M. A., O'Campo, P., O'Brien, K., Firestone, M., Wolfe, S. H., Bourgeois, C., & Smylie,  
1125 J. K. (2017). Our Health Counts Toronto: using respondent-driven sampling to unmask  
1126 census undercounts of an urban indigenous population in Toronto, Canada. *BMJ Open*,  
1127 7(12), e018936. <https://doi.org/10.1136/BMJOPEN-2017-018936>
- 1128 69. *N.S. aims to vaccinate 75 per cent of residents against COVID-19 by early fall | CBC News*.  
1129 (n.d.). Retrieved July 4, 2024, from <https://www.cbc.ca/news/canada/nova-scotia/ns-aims->  
1130 [to-vaccinate-75-per-cent-end-of-september-1.5861871](https://www.cbc.ca/news/canada/nova-scotia/ns-aims-to-vaccinate-75-per-cent-end-of-september-1.5861871)
- 1131 70. Government of Ontario. (2021). *Ontario's COVID-19 vaccination plan | COVID-19*  
1132 *(coronavirus) in Ontario*. <https://covid-19.ontario.ca/ontarios-covid-19-vaccination-plan>
- 1133 71. Small, K. (2021, April 10). *Alberta's COVID-19 vaccine rollout expands to front-line health-*  
1134 *care workers on Monday*. Global News. <https://globalnews.ca/news/7750610/alberta->  
1135 [covid-19-vaccine-rollout-2c/](https://globalnews.ca/news/7750610/alberta-covid-19-vaccine-rollout-2c/)
- 1136 72. Sterritt, A. (2021, March 3). *More than 24,000 Indigenous people in 113 B.C. communities*  
1137 *have received COVID-19 vaccine as Phase 2 begins*. CBC News.

- 1138 [https://www.cbc.ca/news/canada/british-columbia/24000-indigenous-people-receive-](https://www.cbc.ca/news/canada/british-columbia/24000-indigenous-people-receive-covid-19-vaccine-1.5933803)
- 1139 [covid-19-vaccine-1.5933803](https://www.cbc.ca/news/canada/british-columbia/24000-indigenous-people-receive-covid-19-vaccine-1.5933803)
- 1140 73. Inclusion Alberta. (2021, April 26). *UPDATE: High-Risk Albertans with Developmental*
- 1141 *Disabilities & Support Workers Should be Included in the Early Phases of Vaccine Schedule.*
- 1142 [https://inclusionalberta.org/connections/high-risk-albertans-with-developmental-](https://inclusionalberta.org/connections/high-risk-albertans-with-developmental-disabilities-support-workers-should-be-included-in-the-early-phases-of-vaccine-schedule/)
- 1143 [disabilities-support-workers-should-be-included-in-the-early-phases-of-vaccine-schedule/](https://inclusionalberta.org/connections/high-risk-albertans-with-developmental-disabilities-support-workers-should-be-included-in-the-early-phases-of-vaccine-schedule/)
- 1144 74. Government of Manitoba. (2021, March 16). *Department Of Families Circular: COVID-19*
- 1145 *2021-16.* Department Of Families Circular: COVID-19 2021-16.
- 1146 75. Government of Ontario. (2021). *Ontario's COVID-19 vaccination plan | COVID-19*
- 1147 *(coronavirus) in Ontario.* <https://www.ontario.ca/page/covid-19-coronavirus>
- 1148 76. *People deemed clinically extremely vulnerable prioritized for COVID-19 vaccine | BC Gov*
- 1149 *News.* (n.d.). Retrieved July 5, 2024, from [https://news.gov.bc.ca/releases/2021HLTH0022-](https://news.gov.bc.ca/releases/2021HLTH0022-000532)
- 1150 [000532](https://news.gov.bc.ca/releases/2021HLTH0022-000532)
- 1151 77. Campanella, S., Rotenberg, S., Volpe, T., Balogh, R., & Lunskey, Y. (2021, January 20).
- 1152 *Including People with Developmental Disabilities as a Priority Group in Canada's COVID-19*
- 1153 *Vaccination Program: Key Considerations: Part 1.* Health Care Access Research and
- 1154 Developmental Disabilities, CAMH. [https://www.camh.ca/-](https://www.camh.ca/-/media/files/professionals/hcardd/hcardd-including-dd-priority-group-canadas-covid19-vaccine-program-key-considerations-2021-part1-pdf.pdf)
- 1155 [/media/files/professionals/hcardd/hcardd-including-dd-priority-group-canadas-covid19-](https://www.camh.ca/-/media/files/professionals/hcardd/hcardd-including-dd-priority-group-canadas-covid19-vaccine-program-key-considerations-2021-part1-pdf.pdf)
- 1156 [vaccine-program-key-considerations-2021-part1-pdf.pdf](https://www.camh.ca/-/media/files/professionals/hcardd/hcardd-including-dd-priority-group-canadas-covid19-vaccine-program-key-considerations-2021-part1-pdf.pdf)
- 1157 78. Campanella, S., Rotenberg, S., Volpe, T., Balogh, R., & Lunskey, Y. (2021, March 29). *Including*
- 1158 *People with Developmental Disabilities as a Priority Group in Canada's COVID- 19*
- 1159 *Vaccination Program: Key Considerations: Part 2.* Health Care Access Research and

- 1160           Developmental Disabilities, CAMH. <https://www.camh.ca/->
- 1161           /[media/files/professionals/hcardd/hcardd-including-dd-priority-group-canadas-covid19-](https://www.camh.ca/-/media/files/professionals/hcardd/hcardd-including-dd-priority-group-canadas-covid19-vaccine-program-key-considerations-2021-part2-pdf.pdf)
- 1162           [vaccine-program-key-considerations-2021-part2-pdf.pdf](https://www.camh.ca/-/media/files/professionals/hcardd/hcardd-including-dd-priority-group-canadas-covid19-vaccine-program-key-considerations-2021-part2-pdf.pdf)
- 1163   79. Comité sur l'immunisation du Québec. (2021). *Avis Préliminaire Sur Les Groupes Prioritaires*
- 1164           *Pour La Vaccination Contre La COVID-19 Au Québec.*
- 1165           [https://www.inspq.qc.ca/sites/default/files/publications/3085-groupes-prioritaires-](https://www.inspq.qc.ca/sites/default/files/publications/3085-groupes-prioritaires-vaccination-covid19.pdf)
- 1166           [vaccination-covid19.pdf](https://www.inspq.qc.ca/sites/default/files/publications/3085-groupes-prioritaires-vaccination-covid19.pdf)
- 1167   80. Hounsell, K. (2021, March 7). *Prioritizing people with specific conditions for COVID vaccine*
- 1168           *slows race for herd immunity: N.S.'s top doctor.* CBC News.
- 1169           [https://www.cbc.ca/news/canada/nova-scotia/people-with-disabilities-covid-vaccine-](https://www.cbc.ca/news/canada/nova-scotia/people-with-disabilities-covid-vaccine-1.5939380)
- 1170           1.5939380
- 1171   81. Public Health Agency of Canada. (2021, February 12). *Guidance on the prioritization of key*
- 1172           *populations for COVID-19 immunization.* Government of Canada.
- 1173           [https://www.canada.ca/en/public-health/services/immunization/national-advisory-](https://www.canada.ca/en/public-health/services/immunization/national-advisory-committee-on-immunization-naci/guidance-prioritization-key-populations-covid-19-vaccination.html)
- 1174           [committee-on-immunization-naci/guidance-prioritization-key-populations-covid-19-](https://www.canada.ca/en/public-health/services/immunization/national-advisory-committee-on-immunization-naci/guidance-prioritization-key-populations-covid-19-vaccination.html)
- 1175           [vaccination.html](https://www.canada.ca/en/public-health/services/immunization/national-advisory-committee-on-immunization-naci/guidance-prioritization-key-populations-covid-19-vaccination.html)
- 1176   82. Freeze, C., & Hager, M. (2021, February 28). *Ontario gives Toronto OK to prioritize COVID-19*
- 1177           *vaccination of homeless people.* The Globe and Mail.
- 1178           [https://www.theglobeandmail.com/canada/article-ontario-gives-toronto-ok-to-prioritize-](https://www.theglobeandmail.com/canada/article-ontario-gives-toronto-ok-to-prioritize-covid-19-vaccination-of/)
- 1179           [covid-19-vaccination-of/](https://www.theglobeandmail.com/canada/article-ontario-gives-toronto-ok-to-prioritize-covid-19-vaccination-of/)
- 1180   83. Brown, K. A., Stall, N. M., Joh, E., Allen, U., Bogoch, I. I., Buchan, S. A., Daneman, N., Evans,
- 1181           G. A., Fisman, D. N., Gibson, J. L., Hopkins, J., Van Ingen, T., Maltsev, A., Mcgeer, A.,

- 1182 Mishra, S., Razak, F., Sander, B., Schwartz, B., Schwartz, K., ... Jüni, P. (2021). *SCIENCE*  
1183 *BRIEFS A Strategy for the Mass Distribution of COVID-19 Vaccines in Ontario Based on Age*  
1184 *and Neighbourhood*. <https://doi.org/10.47326/ocsat.2021.02.10.1.0>
- 1185 84. Emanuel, E. J., Upshur, R., Thome, B., Parker, M., Glickman, A., Zhang, C., Boyle, C., Smith,  
1186 M., & Phillips, J. P. (2020). Fair Allocation of Scarce Medical Resources in the Time of Covid-  
1187 19. *N Engl J Med*, 382.
- 1188 85. Tasker, J. P. (2021, January 27). *Indigenous people should be priority for COVID-19 shots*  
1189 *even amid shortage: minister*. CBC News. [https://www.cbc.ca/news/politics/indigenous-](https://www.cbc.ca/news/politics/indigenous-vaccinations-priority-marc-miller-1.5889826)  
1190 [vaccinations-priority-marc-miller-1.5889826](https://www.cbc.ca/news/politics/indigenous-vaccinations-priority-marc-miller-1.5889826)
- 1191 86. Peters, D. (n.d.). *Vaccine advocacy to prioritize dentistry*. Faculty of Dentistry, University of  
1192 Toronto. Retrieved October 4, 2023, from  
1193 <https://www.dentistry.utoronto.ca/news/vaccine-advocacy-prioritize-dentistry>
- 1194 87. Ranaldi, C. (2021, February 13). *Advocates call on Quebec to prioritize those with*  
1195 *developmental disabilities for COVID-19 vaccine*. CBC News.  
1196 [https://www.cbc.ca/news/canada/montreal/covid-19-vaccine-priority-down-syndrome-](https://www.cbc.ca/news/canada/montreal/covid-19-vaccine-priority-down-syndrome-1.5913145)  
1197 [1.5913145](https://www.cbc.ca/news/canada/montreal/covid-19-vaccine-priority-down-syndrome-1.5913145)
- 1198 88. Bero, T. (2021, May 11). *Vaccinating Black Toronto | The Local*. The Local.  
1199 <https://thelocal.to/vaccinating-black-toronto/>
- 1200 89. Carey, C. (2021, May 9). *B.C.'s Blind community should receive COVID vaccine priority:*  
1201 *advocate*. CityNews Vancouver. [https://vancouver.citynews.ca/2021/05/09/blindy-covid-](https://vancouver.citynews.ca/2021/05/09/blindy-covid-vaccine-priority/)  
1202 [vaccine-priority/](https://vancouver.citynews.ca/2021/05/09/blindy-covid-vaccine-priority/)



- 1203 90. Rodriguez, J. (2021, February 21). *"It's devastating" disabled people not prioritized in*  
1204 *vaccine rollout, advocates say*. CTV News. [https://www.ctvnews.ca/health/coronavirus/it-](https://www.ctvnews.ca/health/coronavirus/its-devastating-disabled-people-not-prioritized-in-vaccine-rollout-advocates-say-1.5300728)  
1205 [s-devastating-disabled-people-not-prioritized-in-vaccine-rollout-advocates-say-1.5300728](https://www.ctvnews.ca/health/coronavirus/its-devastating-disabled-people-not-prioritized-in-vaccine-rollout-advocates-say-1.5300728)
- 1206 91. Crawley, M. (2021, April 10). *What's behind Ontario's abrupt shift toward vaccinating*  
1207 *everyone in COVID-19 hotspots*. CBC News.  
1208 [https://www.cbc.ca/news/canada/toronto/ontario-covid-19-vaccine-hotspots-postal-](https://www.cbc.ca/news/canada/toronto/ontario-covid-19-vaccine-hotspots-postal-code-1.5979774)  
1209 [code-1.5979774](https://www.cbc.ca/news/canada/toronto/ontario-covid-19-vaccine-hotspots-postal-code-1.5979774)
- 1210 92. Mishra, S., Stall, N. M., Ma, H., Odutayo, A., Kwong, J. C., Allen, U., Brown, K. A., Bogoch, I. I.,  
1211 Erman, A., Huynh, T., Ikura, S., Maltsev, A., McGeer, A., Moloney, G., Morris, A. M., Schull,  
1212 M., Siddiqi, A., Smylie, J., Watts, T., ... Juni, P. (2021). *A Vaccination Strategy for Ontario*  
1213 *COVID-19 Hotspots and Essential Workers*.  
1214 <https://doi.org/10.47326/OCSAT.2021.02.26.1.0>
- 1215 93. Green, M. E., Wong, S. T., Lavoie, J. G., Kwong, J., Macwilliam, L., Peterson, S., Liu, G., &  
1216 Katz, A. (2013). *Admission to hospital for pneumonia and influenza attributable to 2009*  
1217 *pandemic A/H1N1 Influenza in First Nations communities in three provinces of Canada*.  
1218 <https://doi.org/10.1186/1471-2458-13-1029>
- 1219 94. Boggild, A. K., Yuan, L., Low, D. E., & McGeer, A. J. (2011). The Impact of Influenza on the  
1220 Canadian First Nations. *Canadian Journal of Public Health = Revue Canadienne de Santé*  
1221 *Publique*, 102(5), 345. <https://doi.org/10.1007/BF03404174>
- 1222 95. Société québécoise de la déficience intellectuelle. (2021, February 24). *COVID-19 - Les*  
1223 *grandes oubliées de la vaccination : les personnes handicapées et celles vivant avec un*  
1224 *problème de santé mentale - Société québécoise de la déficience intellectuelle*.

- 1225 <https://www.sqdi.ca/fr/actualites/covid-19-les-grandes-oubliees-de-la-vaccination-les->
- 1226 [personnes-handicapees-et-celles-vivant-avec-un-probleme-de-sante-mentale/](https://www.sqdi.ca/fr/actualites/covid-19-les-grandes-oubliees-de-la-vaccination-les-)
- 1227 96. Gentile, D. (2021, March 10). *Prioriser la vaccination des autistes et des déficients*
- 1228 *intellectuels*. Radio-Canada; Radio-Canada.ca. <https://ici.radio->
- 1229 [canada.ca/nouvelle/1776154/covid-19-familles-reclament-priorite-vaccination-autistes-](https://ici.radio-canada.ca/nouvelle/1776154/covid-19-familles-reclament-priorite-vaccination-autistes-)
- 1230 [deficients-intellectuels](https://ici.radio-canada.ca/nouvelle/1776154/covid-19-familles-reclament-priorite-vaccination-autistes-)
- 1231 97. Boutros, M. (2021, April 17). *Québec sommé de permettre aux personnes handicapées de se*
- 1232 *faire vacciner contre la COVID-19 dès maintenant*. Le Devoir.
- 1233 <https://www.ledevoir.com/societe/sante/598965/quebec-somme-de-permettre-aux->
- 1234 [personnes-handicapees-de-se-faire-vacciner-des-maintenant?](https://www.ledevoir.com/societe/sante/598965/quebec-somme-de-permettre-aux-)
- 1235 98. Comité sur l'immunisation du Québec. (2021). *Avis préliminaire sur les groupes prioritaires*
- 1236 *pour la vaccination contre la COVID-19 au Québec*.
- 1237 <https://www.inspq.qc.ca/sites/default/files/publications/3085-groupes-prioritaires->
- 1238 [vaccination-covid19.pdf](https://www.inspq.qc.ca/sites/default/files/publications/3085-groupes-prioritaires-)
- 1239 99. MacLean, C. (2021, February 24). *Métis, Inuit in Manitoba want similar COVID-19 vaccine*
- 1240 *priority as First Nations | CBC News*.
- 1241 <https://www.cbc.ca/news/canada/manitoba/indigenous-manitobans-vaccine-priority->
- 1242 [1.5926939](https://www.cbc.ca/news/canada/manitoba/indigenous-manitobans-vaccine-priority-)
- 1243 100. Province of Manitoba. (2021, May 3). *All Indigenous Peoples in Manitoba 18 and Older*
- 1244 *Now Eligible for COVID-19 Vaccination*.
- 1245 <https://news.gov.mb.ca/news/index.html?item=51201>

- 1246 101. Minister of Justice. (1867, March 29). *THE CONSTITUTION ACTS, 1867 to 1982*.
- 1247 <https://laws-lois.justice.gc.ca/eng/const/index.html>
- 1248 102. *Aboriginal Peoples in Canada: First Nations People, Métis and Inuit*. (n.d.). Retrieved July 6,
- 1249 2024, from [https://www12.statcan.gc.ca/nhs-enm/2011/as-sa/99-011-x/99-011-](https://www12.statcan.gc.ca/nhs-enm/2011/as-sa/99-011-x/99-011-x2011001-eng.cfm)
- 1250 [x2011001-eng.cfm](https://www12.statcan.gc.ca/nhs-enm/2011/as-sa/99-011-x/99-011-x2011001-eng.cfm)
- 1251 103. Black Health Alliance. (n.d.). *COVID-19*. Black Health Alliance. Retrieved October 1, 2023,
- 1252 from <https://blackhealthalliance.ca/covid-19-3/>
- 1253 104. Statistics Canada. (2017). Focus on Geography Series, 2016 Census - Province of British
- 1254 Columbia. In *Data products, 2016 Census*. [https://www12.statcan.gc.ca/census-](https://www12.statcan.gc.ca/census-recensement/2016/as-sa/fogs-spg/Facts-PR-Eng.cfm?TOPIC=9&LANG=Eng&GK=PR&GC=59)
- 1255 [recensement/2016/as-sa/fogs-spg/Facts-PR-Eng.cfm?TOPIC=9&LANG=Eng&GK=PR&GC=59](https://www12.statcan.gc.ca/census-recensement/2016/as-sa/fogs-spg/Facts-PR-Eng.cfm?TOPIC=9&LANG=Eng&GK=PR&GC=59)
- 1256 105. Chastko, K., Charbonneau, P., & Martel, L. (2022). Population growth in Canada's rural
- 1257 areas, 2016 to 2021. In *Statistics Canada's Centre for Demography*.
- 1258 [https://www12.statcan.gc.ca/census-recensement/2021/as-sa/98-200-x/2021002/98-200-](https://www12.statcan.gc.ca/census-recensement/2021/as-sa/98-200-x/2021002/98-200-x2021002-eng.cfm)
- 1259 [x2021002-eng.cfm](https://www12.statcan.gc.ca/census-recensement/2021/as-sa/98-200-x/2021002/98-200-x2021002-eng.cfm)
- 1260 106. Nickel, R., Lewis, J., & Lampert, A. (2020, December 8). *Canada's vast, remote geography*
- 1261 *leaves rural towns vulnerable in coronavirus fight*. Global News.
- 1262 <https://globalnews.ca/news/7508060/canada-geography-rural-town-coronavirus/>
- 1263 107. Aggarwal, M., Kokorelias, K. M., Glazier, R. H., Katz, A., Shiers-Hanley, J. E., & Upshur, R. E.
- 1264 G. (2023). What is the role of primary care in the COVID-19 vaccine roll-out and the
- 1265 barriers and facilitators to an equitable vaccine roll-out? A rapid scoping review of nine
- 1266 jurisdictions. *BMJ Open*, 13(4). <https://doi.org/10.1136/BMJOPEN-2022-065306>

- 1267 108. Gabrielle Giroday. (2019, November 15). *Lack of health data hurting Black Canadian*  
1268 *women, U of T researchers find*. University of Toronto.  
1269 [https://www.utoronto.ca/news/lack-health-data-hurting-black-canadian-women-u-t-](https://www.utoronto.ca/news/lack-health-data-hurting-black-canadian-women-u-t-researchers-find)  
1270 [researchers-find](https://www.utoronto.ca/news/lack-health-data-hurting-black-canadian-women-u-t-researchers-find)
- 1271 109. Gmitroski, K.-L., Hastings, K. G., Legault, G., & Barbic, S. (2023). Métis health in Canada: a  
1272 scoping review of Métis-specific health literature. *Canadian Medical Association Open*  
1273 *Access Journal*, 11(5), E884–E893. <https://doi.org/10.9778/CMAJO.20230006>
- 1274 110. Mckenzie, K. (2021). Socio-demographic data collection and equity in covid-19 in Toronto.  
1275 *EClinicalMedicine*, 34, 100812. <https://doi.org/10.1016/j.eclinm.2021.100812>
- 1276 111. Nnorom, O., Findlay, N., Lee-Foon, N. K., Jain, A. A., Ziegler, C. P., Scott, F. E., Rodney, P., &  
1277 Lofters, A. K. (2019). Dying to Learn: A Scoping Review of Breast and Cervical Cancer  
1278 Studies Focusing on Black Canadian Women. *Journal of Health Care for the Poor and*  
1279 *Underserved*, 30(4), 1331–1359. <https://doi.org/10.1353/HPU.2019.0100>
- 1280 112. Datta, G., Siddiqi, A., & Lofters, A. (2021). Transforming race-based health research in  
1281 Canada. *CMAJ*, 193(3), E99–E100. <https://doi.org/10.1503/CMAJ.201742>
- 1282 113. Alliance for Healthier Communities. (2020, April 10). *Letter to Premier Ford, Deputy*  
1283 *Premier Elliott and Dr. Williams regarding the need to collect and use socio-demographic*  
1284 *and race-based data*. [https://www.allianceon.org/news/Letter-Premier-Ford-Deputy-](https://www.allianceon.org/news/Letter-Premier-Ford-Deputy-Premier-Elliott-and-Dr-Williams-regarding-need-collect-and-use-socio)  
1285 [Premier-Elliott-and-Dr-Williams-regarding-need-collect-and-use-socio](https://www.allianceon.org/news/Letter-Premier-Ford-Deputy-Premier-Elliott-and-Dr-Williams-regarding-need-collect-and-use-socio)
- 1286 114. Public Health Agency of Canada. (2021, February 21). *CPHO Sunday Edition: The Impact of*  
1287 *COVID-19 on Racialized Communities - Canada.ca*. Government of Canada.

- 1288 <https://www.canada.ca/en/public-health/news/2021/02/cpho-sunday-edition-the-impact->  
1289 [of-covid-19-on-racialized-communities.html](https://www.canada.ca/en/public-health/news/2021/02/cpho-sunday-edition-the-impact-of-covid-19-on-racialized-communities.html)
- 1290 115. Chief Public Health Officer of Canada. (2020). *From risk to resilience: An equity approach to*  
1291 *COVID-19*. [https://www.canada.ca/en/public-health/corporate/publications/chief-public-](https://www.canada.ca/en/public-health/corporate/publications/chief-public-health-officer-reports-state-public-health-canada/from-risk-resilience-equity-approach-covid-19.html)  
1292 [health-officer-reports-state-public-health-canada/from-risk-resilience-equity-approach-](https://www.canada.ca/en/public-health/corporate/publications/chief-public-health-officer-reports-state-public-health-canada/from-risk-resilience-equity-approach-covid-19.html)  
1293 [covid-19.html](https://www.canada.ca/en/public-health/corporate/publications/chief-public-health-officer-reports-state-public-health-canada/from-risk-resilience-equity-approach-covid-19.html)
- 1294 116. Anderson, T. (2021). *Portrait of youth in Canada: Data report — Chapter 4: Indigenous*  
1295 *Youth in Canada*. [https://www150.statcan.gc.ca/n1/pub/42-28-](https://www150.statcan.gc.ca/n1/pub/42-28-0001/2021001/article/00004-eng.htm)  
1296 [0001/2021001/article/00004-eng.htm](https://www150.statcan.gc.ca/n1/pub/42-28-0001/2021001/article/00004-eng.htm)
- 1297 117. Block, S., & Galabuzi, G.-E. (2011). *Canada's Colour Coded Labour Market: The gap for*  
1298 *racialized workers*.  
1299 [https://homelesshub.ca/sites/default/files/Colour\\_Coded\\_Labour\\_MarketFINAL.pdf](https://homelesshub.ca/sites/default/files/Colour_Coded_Labour_MarketFINAL.pdf)
- 1300 118. Wrigley-Field, E., Kiang, M. V, Riley, A. R., Barbieri, M., Chen, Y.-H., Duchowny, K. A.,  
1301 Matthay, E. C., Van Riper, D., Jegathesan, K., Bibbins-Domingo, K., & Leider, J. P. (2021).  
1302 Geographically targeted COVID-19 vaccination is more equitable and averts more deaths  
1303 than age-based thresholds alone COVID-19 mortality increases markedly with age and is  
1304 also substantially higher among Black, Indigenous, and People of Color (BIPOC) populations  
1305 in the. *Sci. Adv*, 7.
- 1306 119. Ghazal, I., Rachadi, A., & Ez-Zahraouy, H. (2022). Optimal allocation strategies for  
1307 prioritized geographical vaccination for Covid-19. *Physica A: Statistical Mechanics and Its*  
1308 *Applications*, 607, 128166. <https://doi.org/10.1016/J.PHYSA.2022.128166>  
1309

## Supporting information

**S1 Appendix.** COnsolidated criteria for REporting Qualitative research (COREQ): 32-item checklist.

**S2 Appendix.** Environmental scan data collection tool.

**S3 Appendix.** Key informant interview guide.

|  |                   |
|--|-------------------|
|  | Not prioritized   |
|  | Phase 1           |
|  | Phase 2           |
|  | Phase 3           |
|  | No defined phases |

|                   |                  | January 2021                                                                                     | February 2021 | March 2021 | April 2021 | May 2021 |
|-------------------|------------------|--------------------------------------------------------------------------------------------------|---------------|------------|------------|----------|
| Black communities | Alberta          |                                                                                                  |               |            |            |          |
|                   | British Columbia |                                                                                                  |               |            |            |          |
|                   | Manitoba         |                                                                                                  |               |            |            |          |
|                   | Nova Scotia      | All African Nova Scotian communities (planning began in Feb; first vaccines administered in Apr) |               |            |            |          |
|                   | Ontario          | Ages 12+ in "hot spot" communities                                                               |               |            |            |          |
|                   | Quebec           |                                                                                                  |               |            |            |          |

|                               |                  | January 2021                             | February 2021                                                                                                                                            | March 2021                     | April 2021        | May 2021                 |  |
|-------------------------------|------------------|------------------------------------------|----------------------------------------------------------------------------------------------------------------------------------------------------------|--------------------------------|-------------------|--------------------------|--|
| First Nations, Inuit, & Métis | Alberta          | Remote and fly-in FN communities         | FN or Métis aged 65+                                                                                                                                     | FNIM aged 50+ (on/off reserve) | All FNIM aged 35+ |                          |  |
|                               | British Columbia | Remote & isolated Indigenous communities | FNIM aged 65+; Elders & other community leaders                                                                                                          | FNIM aged 18-64                |                   |                          |  |
|                               | Manitoba         |                                          | First dose by age group: FN in remote communities and in urban centres (incl. Elders, Traditional Healers, & Knowledge Keepers)                          |                                |                   | All FNIM for second dose |  |
|                               | Nova Scotia      |                                          | Mi'kmaq and FN communities aged 55+, starting with Elders, Knowledge, and Language Keepers, followed by other Indigenous communities on- and off-reserve |                                |                   |                          |  |
|                               | Quebec           |                                          | Rank 4: Adults aged 18+ of remote or isolated communities (added in revised plan released in March)                                                      |                                |                   |                          |  |

medRxiv preprint doi: <https://doi.org/10.1101/2024.08.28.24312721>; this version posted August 28, 2024. The copyright holder for this preprint (which was not certified by peer review) is the author/funder, who has granted medRxiv a license to display the preprint in perpetuity. It is made available under a [CC-BY 4.0 International license](https://creativecommons.org/licenses/by/4.0/).

|                               |                  | January 2021 | February 2021                                                                                        | March 2021 | April 2021                           | May 2021                                                               |    |     |
|-------------------------------|------------------|--------------|------------------------------------------------------------------------------------------------------|------------|--------------------------------------|------------------------------------------------------------------------|----|-----|
| Non-medical essential workers | Alberta          |              |                                                                                                      |            | Workplaces at high risk of outbreaks |                                                                        |    |     |
|                               | British Columbia |              |                                                                                                      |            | Priority front-line workers          | Priority front-line workers continued                                  |    |     |
|                               | Manitoba         |              |                                                                                                      |            |                                      | All critical workers                                                   |    |     |
|                               | Nova Scotia      |              | Workers in high-risk congregate settings who cannot work from home (e.g. cannot physically distance) |            |                                      | Those who travel out of province                                       |    |     |
|                               | Ontario          |              |                                                                                                      |            |                                      | *                                                                      | ** | *** |
|                               | Quebec           |              |                                                                                                      |            |                                      | Rank 9: adults <60 yrs in essential services who cannot work virtually |    |     |

|                                       |                  | January 2021 | February 2021                             | March 2021 | April 2021                                                  | May 2021                                                                         |  |  |
|---------------------------------------|------------------|--------------|-------------------------------------------|------------|-------------------------------------------------------------|----------------------------------------------------------------------------------|--|--|
| Individuals experiencing homelessness | Alberta          |              |                                           |            | Transient populations                                       |                                                                                  |  |  |
|                                       | British Columbia |              |                                           |            | Vulnerable populations living in select congregate settings |                                                                                  |  |  |
|                                       | Manitoba         |              | Residents of congregate living facilities |            | Urban Indigenous unhoused population                        |                                                                                  |  |  |
|                                       | Nova Scotia      |              |                                           |            | Residents living in homeless shelters                       |                                                                                  |  |  |
|                                       | Ontario          |              |                                           |            |                                                             | Shelter residents + individuals living in encampments                            |  |  |
|                                       | Quebec           |              |                                           |            |                                                             | Rank 4: Residents of homeless shelters (added in revised plan released in March) |  |  |

|                               |                  | January 2021 | February 2021                           | March 2021 | April 2021                                                                                                                    | May 2021                                    |  |  |
|-------------------------------|------------------|--------------|-----------------------------------------|------------|-------------------------------------------------------------------------------------------------------------------------------|---------------------------------------------|--|--|
| Individuals with disabilities | Alberta          |              |                                         |            | Those aged 12-64 with profound learning disabilities or severe developmental delays                                           |                                             |  |  |
|                               | British Columbia |              | Severely disabled and institutionalized |            | Clinically vulnerable with dev. disabilities; significant high-risk disabilities (16-74 yrs)                                  |                                             |  |  |
|                               | Manitoba         |              |                                         |            | High-risk individuals aged 55-64 with severe dev. disabilities; adults of CLdS living in congregate care settings (mid-March) |                                             |  |  |
|                               | Nova Scotia      |              |                                         |            |                                                                                                                               |                                             |  |  |
|                               | Ontario          |              |                                         |            |                                                                                                                               | High-risk with dev./intellect. disabilities |  |  |
|                               | Quebec           |              |                                         |            | Rank 8: Those < 60 yrs and institutionalized; homebound residents (incl. in March revised plan)                               |                                             |  |  |

Figure 1
